# Supplementary material for: Adoption of Digital Vaccination Services: It Is the Click Flow, Not the Value—An Empirical Analysis of the Vaccination Management of the COVID-19 Pandemic in Germany
Source: MDPI journal article supplement (doi:10.3390/vaccines11040750), 2023-03-28
Supplement: s1 [file s1]

| lfdn | dispcode | lastpage | duration | Federal | Vaccinat. | Role | Health | Age | Gender | Education | Vaccin. | Priorisati | Type of | Vacc. | Healt | Work | Campaign | Personal_ | Personal_ | Personal_ | Commun | Commun | Commun | Data_Res | Data_Res | Data_Res | Integ_Pro | Integ_Pro | Integ_Pro | Satis_1 | Satis_2 | Satis_3 | Satis_4 | Intent_Ad | Intent_Ad | Consum_ | Consum_ | Consum_ | Usability_ | Usability_ | Perc_Valu | Perc_Valu | Sec_Risk_ | Sec_Risk_ | Image_ba | Image_ba | Perc_Dep | Perc_Dep | Techn_An | Techn_An | Ideol_Bar | Ideol_Bar | Trad_Barr | Trad_Barr | Ind_Inerti | Ind_Inerti |   |   |   |   |
|------|----------|----------|----------|---------|-----------|------|--------|-----|--------|-----------|---------|------------|---------|-------|-------|------|----------|-----------|-----------|-----------|--------|--------|--------|----------|----------|----------|-----------|-----------|-----------|---------|---------|---------|---------|-----------|-----------|---------|---------|---------|------------|------------|-----------|-----------|-----------|-----------|----------|----------|----------|----------|----------|----------|-----------|-----------|-----------|-----------|------------|------------|---|---|---|---|
| 1    | 31       | 5941582  | 253      |         |           | 1    | 2      |     | 1      | 6         | 1       | 6          | 3       |       |       |      |          | 5         | 3         | 3         | 6      | 6      | 6      | 7        | 7        | 7        | 4         | 4         | 4         | 6       | 7       | 7       | 5       | 7         | 7         | 1       | 7       | 1       | 1          | 1          | 1         | 1         | 7         | 4         | 4        | 1        | 1        | 1        | 1        | 1        | 1         | 1         | 1         | 4         | 2          | 2          | 1 |   |   |   |
| 2    | 31       | 5941582  | 1483     |         |           | 1    | 1      |     | 5      | 2         | 2       | 5          | 2       |       | 1     | 5    | 4        | 1         | 1         | 1         | 1      | 1      | 1      |          |          |          | 1         | 1         | 1         | 1       | 1       | 1       | 1       | 7         | 1         | 1       | 1       | 1       | 7          | 7          | 7         | 7         | 1         | 1         | 7        | 7        | 1        | 1        | 1        | 1        | 1         | 1         | 2         | 4         | 6          | 3          | 3 |   |   |   |
| 3    | 31       | 5941582  | 1515     |         |           | 1    | 1      |     | 5      | 1         | 1       | 1          | 1       |       | 1     | 8    | 8        | 1         | 1         | 1         | 1      | 1      | 1      | 1        | 1        | 1        | 1         | 1         | 1         | 1       | 1       | 1       | 1       | 1         | 1         | 1       | 7       | 7       | 7          | 7          | 7         | 1         | 1         | 7         | 7        | 1        | 1        | 1        | 1        | 1        | 1         | 1         | 1         | 1         | 1          |            |   |   |   |   |
| 4    | 31       | 5941582  | 695      |         |           | 1    | 2      |     | 2      | 2         | 1       | 1          | 3       |       |       |      |          | 7         | 7         | 7         | 7      | 7      | 7      | 7        | 7        | 7        | 7         | 7         |           | 1       | 1       | 1       | 1       | 1         | 1         | 1       | 1       | 7       | 7          | 7          | 7         | 7         | 1         | 1         | 7        | 7        | 1        | 1        | 1        | 1        | 1         | 1         | 1         | 1         | 1          | 1          |   |   |   |   |
| 5    | 31       | 5941582  | 1458     |         |           | 3    | 1      |     | 1      | 6         | 1       | 6          | 4       |       | 1     | 16   | 5        | 4         | 4         | 4         | 4      | 4      | 4      | 4        | 4        | 4        | 4         | 4         | 4         | 4       | 4       | 4       | 4       | 4         | 4         | 4       | 4       | 4       | 4          | 4          | 4         | 4         | 4         | 4         | 4        | 4        | 4        | 4        | 4        | 4        | 4         | 4         | 4         | 4         | 4          | 4          |   |   |   |   |
| 6    | 31       | 5941582  | 54       |         |           | 1    | 1      |     | 1      | 6         | 1       | 6          | 1       |       | 1     | 3    | 6        | 4         | 4         | 4         | 4      | 4      | 4      | 4        | 4        | 4        | 4         | 4         | 4         | 4       | 4       | 4       | 4       | 4         | 4         | 4       | 4       | 4       | 4          | 4          | 4         | 4         | 4         | 4         | 4        | 4        | 4        | 4        | 4        | 4        | 4         | 4         | 4         | 4         | 4          | 4          |   |   |   |   |
| 7    | 31       | 5941582  | 214      |         |           | 1    | 1      |     | 5      | 3         | 2       | 4          | 1       |       | 1     | 78   | 12       | 6         | 5         | 3         | 5      | 4      | 4      | 4        | 4        | 4        | 6         | 4         | 5         | 5       | 5       | 5       | 5       | 5         | 5         | 5       | 5       | 5       | 3          | 3          | 3         | 3         | 5         | 5         | 2        | 2        | 4        | 4        | 4        | 4        | 4         | 4         | 4         | 4         | 4          | 4          | 4 | 4 | 4 |   |
| 8    | 31       | 5941582  | 246      | 12      | 1         | 1    | 2      | 5   | 5      | 6         | 1       | 4          | 3       | 1     |       |      |          | 7         | 7         | 7         | 7      | 7      | 7      | 5        | 4        | 4        | 4         | 5         | 5         | 7       | 7       | 7       | 7       | 7         | 7         | 1       | 1       | 1       | 1          | 1          | 1         | 7         | 1         | 1         | 1        | 1        | 1        | 1        | 1        | 1        | 1         | 1         | 5         | 2         | 1          | 1          |   |   |   |   |
| 9    | 31       | 5941582  | 358      | 12      | 1         | 1    | 2      | 2   | 1      | 5         | 1       | 6          | 6       | 1     |       |      |          | 7         | 5         | 4         | 7      | 7      | 4      | 5        | 5        | 5        | 5         | 7         | 3         | 3       | 3       | 7       | 5       | 4         | 7         | 2       | 1       | 1       | 1          | 3          | 5         | 7         | 1         | 1         | 1        | 1        | 1        | 1        | 1        | 1        | 1         | 1         | 1         | 1         | 2          | 1          | 4 | 3 | 2 | 4 |
| 1    | 31       | 5941582  | 458      | 12      | 1         | 1    | 2      | 5   | 5      | 6         | 1       | 6          | 1       | 1     |       |      |          | 7         | 6         | 6         | 7      | 7      | 7      | 7        | 7        | 7        | 4         | 4         | 7         | 7       | 7       | 7       | 7       | 7         | 1         | 1       | 1       | 1       | 1          | 1          | 1         | 7         | 1         | 1         | 1        | 1        | 1        | 1        | 1        | 1        | 1         | 1         | 1         | 1         | 1          | 1          | 1 | 1 | 1 |   |
| 11   | 31       | 5941582  | 623      | 12      | 3         | 1    | 2      | 5   | 5      | 3         | 1       | 5          | 1       | 1     |       |      |          | 5         | 5         | 4         | 4      | 4      | 4      | 4        | 4        | 4        | 4         | 3         | 4         | 4       | 4       | 4       | 4       | 4         | 3         | 3       | 2       | 2       | 2          | 3          | 3         | 4         | 5         | 4         | 3        | 4        | 5        | 4        | 3        | 2        | 2         | 4         | 4         | 6         | 5          | 2          | 3 |   |   |   |
| 12   | 31       | 5941582  | 351      | 12      | 1         | 1    | 2      | 3   | 5      | 3         | 1       | 4          | 3       | 1     |       |      |          | 7         | 5         | 6         | 7      | 4      | 4      |          | 5        | 5        | 4         | 4         | 4         | 7       | 7       | 4       | 5       | 4         | 7         | 1       | 1       | 1       | 1          | 1          | 1         | 7         | 4         | 4         | 1        | 1        | 1        | 1        | 1        | 1        | 1         | 1         | 1         | 4         | 4          | 1          | 1 |   |   |   |
| 13   | 31       | 5941582  | 752      | 12      | 1         | 1    | 2      | 5   | 5      | 6         | 1       | 5          | 3       | 1     |       |      |          | 7         | 7         | 7         | 7      | 7      | 7      | 5        | 5        | 5        | 6         | 5         | 6         | 7       | 5       | 5       | 5       | 5         | 3         | 1       | 1       | 1       | 1          | 1          | 1         | 7         | 4         | 4         | 5        | 6        | 2        | 3        | 2        | 2        | 3         | 3         | 6         | 5         | 3          | 5          |   |   |   |   |
| 14   | 31       | 5941582  | 37       | 12      | 1         | 1    | 2      | 3   | 5      | 6         | 1       | 6          | 6       | 1     |       |      |          | 6         | 5         | 5         | 4      | 6      | 5      | 2        | 2        | 2        | 5         | 6         | 6         | 6       | 6       | 6       | 6       | 6         | 4         | 4       | 2       | 5       | 2          | 1          | 4         | 2         | 6         | 3         | 3        | 3        | 3        | 2        | 2        | 2        | 2         | 2         | 2         | 3         | 3          | 2          | 5 |   |   |   |
| 15   | 31       | 5941582  | 47       | 12      | 1         | 1    | 1      | 4   | 5      | 4         | 1       | 6          | 1       | 1     | 3     | 26   | 7        | 7         | 7         | 7         | 7      | 7      | 7      | 6        | 6        | 6        | 7         | 7         | 6         | 7       | 7       | 7       | 7       | 3         | 7         | 1       | 1       | 1       | 1          | 1          | 1         | 7         | 1         | 1         | 1        | 3        | 1        | 1        | 1        | 1        | 1         | 1         | 1         | 3         | 2          | 2          | 4 |   |   |   |
| 16   | 31       | 5941582  | 412      | 12      | 1         | 1    | 2      | 7   | 5      | 6         | 1       | 2          | 3       | 1     |       |      |          | 7         | 7         | 7         | 7      | 7      | 7      | 5        | 6        | 6        | 4         | 6         | 4         | 7       | 7       | 7       | 7       | 3         | 6         | 1       | 1       | 1       | 1          | 1          | 2         | 6         | 2         | 2         | 1        | 1        | 1        | 1        | 1        | 1        | 4         | 3         | 1         | 4         |            |            |   |   |   |   |
| 17   | 31       | 5941582  | 366      | 12      | 1         | 1    | 2      | 2   | 1      | 5         | 1       | 6          | 3       | 1     |       |      |          | 5         | 4         | 4         | 6      | 6      | 4      | 6        | 6        | 7        | 4         | 4         | 3         | 7       | 7       | 7       | 7       | 5         | 6         | 1       | 1       | 1       | 1          | 2          | 1         | 7         | 1         | 1         | 2        | 2        | 1        | 1        | 1        | 1        | 4         | 2         | 3         | 4         |            |            |   |   |   |   |
| 18   | 31       | 5941582  | 329      | 12      | 1         | 1    | 2      | 8   | 1      | 4         | 2       | 1          | 1       | 1     |       |      |          | 7         |           |           |        |        |        |          |          |          |           |           | 7         | 7       | 7       | 7       | 7       | 7         | 1         | 1       | 1       | 1       | 1          | 1          | 7         | 4         | 4         | 7         | 7        | 1        | 1        | 3        | 2        | 5        | 7         | 7         | 4         | 1         | 7          |            |   |   |   |   |
| 19   | 31       | 5941582  | 474      | 12      | 1         | 1    | 2      | 3   | 2      | 5         | 1       | 5          | 1       | 2     |       |      |          | 2         | 2         | 3         | 5      | 2      | 1      | 1        | 1        | 1        | 2         | 6         | 2         | 5       | 2       | 1       | 1       | 2         | 1         | 7       | 7       | 4       | 3          | 6          | 6         | 2         | 4         | 4         | 2        | 3        | 7        | 7        | 3        | 2        | 5         | 7         | 7         | 4         | 3          | 5          |   |   |   |   |
| 2    | 31       | 5941582  | 246      | 12      | 1         | 1    | 2      | 6   | 5      | 6         | 1       | 7          | 1       | 2     |       |      |          | 1         | 1         | 1         | 1      | 1      | 1      | 2        | 2        | 1        | 1         | 1         | 2         | 1       | 1       | 5       | 1       | 1         | 1         | 1       | 1       | 2       | 7          | 7          | 7         | 7         | 4         | 4         | 1        | 1        | 1        | 1        | 1        | 1        | 1         | 1         | 1         | 1         | 1          | 1          | 1 | 1 |   |   |
| 21   | 31       | 5941582  | 354      | 12      | 1         | 1    | 2      | 5   | 5      | 6         | 1       | 4          | 3       | 1     |       |      |          | 3         | 2         | 2         | 5      | 5      | 6      | 1        | 2        | 2        | 6         | 6         | 5         | 4       | 4       | 5       | 5       | 2         | 2         | 5       | 5       | 5       | 3          | 7          | 2         | 5         | 4         | 4         | 6        | 5        | 2        | 2        | 2        | 2        | 4         | 4         | 6         | 6         | 1          | 3          |   |   |   |   |
| 22   | 31       | 5941582  | 378      | 12      | 3         | 1    | 2      | 3   | 1      | 4         | 6       | 7          | 3       | 1     |       |      |          | 7         | 7         | 7         | 7      | 7      | 7      | 7        | 7        | 7        | 7         | 7         | 7         | 7       | 7       | 7       | 7       | 7         | 1         | 1       | 1       | 1       | 1          | 1          | 7         | 4         | 4         | 1         | 1        | 1        | 1        | 1        | 1        | 1        | 1         | 1         | 4         | 1         | 5          |            |   |   |   |   |
| 23   | 31       | 5941582  | 492      | 12      | 4         | 1    | 2      | 6   | 5      | 6         | 1       | 3          | 2       | 1     |       |      |          | 5         | 3         | 3         | 5      | 4      | 3      | 3        | 3        | 3        | 5         | 5         | 5         | 4       | 4       | 5       | 5       | 4         | 4         | 2       | 2       | 2       | 2          | 3          | 2         | 6         | 2         | 2         | 3        | 3        | 2        | 2        | 2        | 2        | 2         | 2         | 6         | 5         | 2          | 2          |   |   |   |   |
| 24   | 31       | 5941582  | 252      | 12      | 1         | 1    | 2      | 4   | 1      | 3         | 1       | 5          | 1       | 1     |       |      |          | 7         | 6         | 6         | 7      | 7      | 4      | 2        | 3        | 2        | 3         | 3         | 3         | 7       | 7       | 7       | 7       | 7         | 7         | 1       | 1       | 1       | 1          | 1          | 1         | 7         | 3         | 3         | 1        | 1        | 1        | 1        | 1        | 1        | 1         | 1         | 6         | 6         | 1          | 7          |   |   |   |   |
| 25   | 31       | 5941582  | 41       | 12      | 1         | 1    | 2      | 4   | 5      | 4         | 1       | 5          | 3       | 1     |       |      |          | 6         | 2         | 2         | 4      | 4      | 4      | 2        | 2        | 2        | 5         | 3         | 4         | 2       | 2       | 5       | 4       | 6         | 6         | 4       | 2       | 2       | 2          | 4          | 6         | 6         | 4         | 4         | 1        | 1        | 1        | 1        | 1        | 1        | 1         | 1         | 4         | 4         | 2          | 2          |   |   |   |   |
| 26   | 31       | 5941582  | 381      | 12      | 1         | 1    | 2      | 5   | 5      | 6         | 1       | 4          | 3       | 1     |       |      |          | 7         | 5         | 6         | 6      | 6      | 6      | 6        | 6        | 6        | 7         | 6         | 6         | 6       | 6       | 6       | 6       | 6         | 6         | 1       | 2       | 1       | 2          | 2          | 2         | 7         | 2         | 2         | 3        | 3        | 5        | 3        | 2        | 1        | 3         | 2         | 5         | 4         | 3          | 5          |   |   |   |   |

|    |    |         |      |    |   |   |   |   |   |   |   |   |   |   |   |    |   |   |   |   |   |   |   |   |   |   |   |   |   |   |   |   |   |   |   |   |   |   |   |   |   |   |   |   |   |   |   |   |   |   |   |   |   |   |   |   |   |   |
|----|----|---------|------|----|---|---|---|---|---|---|---|---|---|---|---|----|---|---|---|---|---|---|---|---|---|---|---|---|---|---|---|---|---|---|---|---|---|---|---|---|---|---|---|---|---|---|---|---|---|---|---|---|---|---|---|---|---|---|
| 27 | 31 | 5941582 | 321  | 11 | 3 | 1 | 2 | 3 | 5 | 6 | 1 | 6 | 3 | 1 |   |    |   | 2 | 2 | 2 | 1 | 4 | 4 | 3 | 2 | 1 | 3 | 2 | 4 | 3 | 1 | 1 | 2 | 2 | 2 | 6 | 2 | 2 | 2 | 2 | 2 | 2 | 3 | 3 | 1 | 1 | 2 | 2 | 2 | 1 | 1 | 2 | 3 | 2 | 1 | 2 |   |   |
| 28 | 31 | 5941582 | 476  | 12 | 1 | 1 | 2 |   | 5 | 5 | 1 | 6 | 5 | 1 |   |    |   | 7 | 5 | 4 | 6 | 7 | 5 | 4 | 4 | 4 | 5 | 5 | 4 | 5 | 5 | 6 | 5 | 3 | 6 | 3 | 3 | 3 | 1 | 2 | 2 | 5 | 4 | 4 | 2 | 2 | 2 | 2 | 2 | 2 | 2 | 4 | 4 | 3 | 5 |   |   |   |
| 29 | 31 | 5941582 | 48   | 12 | 1 | 1 | 1 | 4 | 5 | 4 | 1 | 6 | 1 | 1 | 1 | 2  | 3 | 6 | 4 | 5 | 7 | 7 | 4 | 2 | 2 | 2 | 4 | 5 | 4 | 6 | 5 | 7 | 7 | 7 | 7 | 5 | 5 | 5 | 2 | 7 | 6 | 3 | 6 | 6 | 3 | 3 | 5 | 6 | 4 | 5 | 6 | 5 | 5 | 5 | 3 | 3 |   |   |
| 3  | 31 | 5941582 | 34   | 12 | 1 | 1 | 2 | 4 | 5 | 4 | 1 | 2 | 1 | 1 |   |    |   | 6 | 6 | 6 | 6 | 5 | 5 | 7 | 7 | 7 | 5 | 5 | 4 | 6 | 6 | 7 | 7 | 5 | 7 | 3 | 3 | 1 | 1 | 2 | 2 | 6 | 3 | 2 | 1 | 1 | 1 | 1 | 1 | 1 | 1 | 1 | 2 | 2 | 2 | 4 |   |   |
| 31 | 31 | 5941582 | 393  | 12 | 1 | 1 | 2 | 4 | 5 | 3 | 1 | 5 | 5 | 1 |   |    |   | 7 | 6 | 7 | 7 | 6 | 5 | 6 | 6 | 6 | 7 | 7 | 7 | 7 | 7 | 7 | 7 | 1 | 2 | 1 | 1 | 1 | 1 | 7 | 2 | 2 | 1 | 1 | 1 | 1 | 1 | 1 | 1 | 1 | 6 | 6 | 2 | 4 |   |   |   |   |
| 32 | 31 | 5941582 | 412  | 12 | 1 | 1 | 2 | 4 | 5 | 4 | 1 | 6 | 3 | 1 |   |    |   | 7 | 7 | 7 | 7 | 7 | 6 | 4 | 6 | 6 | 5 | 7 | 6 | 7 | 7 | 7 | 7 | 5 | 7 | 1 | 1 | 1 | 1 | 1 | 7 | 2 | 3 | 1 | 1 | 1 | 1 | 1 | 1 | 1 | 1 | 7 | 4 | 2 | 7 |   |   |   |
| 33 | 31 | 5941582 | 646  | 12 | 1 | 1 | 2 | 6 | 5 | 3 | 2 | 6 | 1 | 1 |   |    |   | 6 | 5 |   | 7 | 7 |   | 5 | 5 | 5 |   | 6 | 7 | 5 | 6 | 7 | 6 | 7 | 7 | 6 | 1 | 1 | 3 | 3 | 2 | 7 | 2 | 2 | 2 | 2 | 2 | 2 | 1 | 1 | 2 | 2 | 3 | 3 | 1 | 4 |   |   |
| 34 | 31 | 5941582 | 499  | 12 | 1 | 1 | 2 | 5 | 1 | 6 | 1 | 4 | 3 | 1 |   |    |   | 6 | 5 | 6 | 7 | 7 | 7 | 6 | 6 | 6 | 7 | 7 | 7 | 6 | 6 | 6 | 5 | 7 | 7 | 1 | 1 | 1 | 3 | 2 | 2 | 2 | 4 | 4 | 5 | 4 | 5 | 2 | 2 | 2 | 2 | 2 | 2 | 2 | 2 | 1 |   |   |
| 35 | 31 | 5941582 | 573  | 12 | 1 | 1 | 2 | 6 | 5 | 3 | 1 | 6 | 1 | 1 |   |    |   | 6 | 6 | 6 | 7 | 6 | 6 | 6 | 6 | 6 | 6 | 5 | 6 | 6 | 6 | 6 | 5 | 5 | 6 | 2 | 1 | 1 | 1 | 2 | 2 | 7 | 5 | 2 | 2 | 2 | 3 | 3 | 1 | 4 | 3 | 3 | 6 | 5 | 3 | 4 |   |   |
| 36 | 31 | 5941582 | 896  | 12 | 1 | 1 | 2 | 3 | 1 | 4 | 1 | 6 | 1 | 1 |   |    |   | 7 | 5 | 5 | 7 | 7 | 7 | 5 | 5 | 5 | 6 | 6 | 6 | 6 | 6 | 6 | 6 | 6 | 6 | 2 | 1 | 1 | 2 | 3 | 2 | 7 | 2 | 2 | 2 | 2 | 2 | 1 | 1 | 1 | 1 | 1 | 1 | 4 | 4 | 2 | 3 |   |
| 37 | 31 | 5941582 | 777  | 12 | 1 | 1 | 2 | 6 | 1 | 6 | 1 | 4 | 3 | 2 |   |    |   | 6 | 4 | 6 | 7 | 5 | 7 | 6 | 7 | 6 | 6 | 7 | 6 | 7 | 6 | 7 | 7 | 6 | 7 | 2 | 1 | 1 | 2 | 1 | 2 | 7 | 3 | 3 | 2 | 1 | 2 | 3 | 1 | 2 | 3 | 2 | 4 | 1 | 2 | 4 |   |   |
| 38 | 31 | 5941582 | 781  | 12 | 1 | 1 | 2 | 6 | 5 | 4 | 1 | 6 | 3 | 1 |   |    |   | 7 | 6 | 6 | 6 | 7 | 5 | 7 | 6 | 6 | 6 | 6 | 6 | 6 | 6 | 6 | 7 | 7 | 5 | 6 | 2 | 2 | 2 | 2 | 1 | 1 | 1 | 7 | 2 | 2 | 6 | 7 | 6 | 4 | 5 | 4 | 7 | 4 | 7 | 7 | 1 | 6 |
| 39 | 31 | 5941582 | 623  | 12 | 1 | 1 | 2 | 4 | 5 | 3 | 1 | 6 | 3 | 1 |   |    |   | 7 | 4 | 4 | 7 | 7 | 7 | 6 | 6 | 6 | 4 | 6 | 5 | 7 | 7 | 7 | 7 | 7 | 7 | 1 | 1 | 1 | 1 | 2 | 1 | 7 | 6 | 6 | 3 | 3 | 2 | 1 | 1 | 2 | 2 | 2 | 3 | 3 | 2 | 6 |   |   |
| 4  | 31 | 5941582 | 523  | 12 | 1 | 1 | 2 | 7 | 1 | 6 | 2 | 2 | 3 | 1 |   |    |   | 3 | 1 | 1 | 1 | 1 | 1 | 1 | 3 | 1 | 1 | 1 | 1 | 1 | 1 | 1 | 1 | 4 | 1 | 7 | 3 | 7 | 4 | 7 | 5 | 4 | 3 | 4 | 7 | 5 | 7 | 6 | 7 | 5 | 7 | 6 | 7 | 7 | 4 | 3 |   |   |
| 41 | 31 | 5941582 | 823  | 12 | 1 | 1 | 2 | 3 | 5 | 6 | 1 | 7 | 5 | 1 |   |    |   | 3 | 4 | 3 | 7 | 6 | 6 | 5 | 5 | 5 | 6 | 6 | 6 | 4 | 4 | 5 | 5 | 6 | 7 | 4 | 3 | 1 | 2 | 5 | 6 | 6 | 4 | 4 | 2 | 3 | 2 | 2 | 2 | 2 | 2 | 2 | 4 | 3 | 3 | 1 |   |   |
| 42 | 31 | 5941582 | 422  | 12 | 1 | 1 | 2 | 5 | 5 | 4 | 1 | 5 | 1 | 1 |   |    |   | 7 | 5 | 6 | 7 | 7 | 6 | 5 | 6 | 6 | 6 | 6 | 5 | 5 | 6 | 7 | 6 | 1 | 6 | 1 | 4 | 4 | 1 | 3 | 2 | 5 | 1 | 1 | 5 | 5 | 3 | 3 | 1 | 1 | 3 | 3 | 5 | 6 | 1 | 5 |   |   |
| 43 | 31 | 5941582 | 5    | 12 | 1 | 1 | 1 | 6 | 5 | 7 | 1 | 3 | 3 | 1 | 4 | 4  | 8 | 7 | 7 | 7 | 7 | 7 | 7 | 7 | 7 | 7 | 7 | 7 | 7 | 7 | 7 | 7 | 7 | 7 | 1 | 1 | 1 | 1 | 1 | 1 | 7 | 1 | 1 | 3 | 3 | 1 | 1 | 1 | 1 | 1 | 1 | 7 | 7 | 1 | 4 |   |   |   |
| 44 | 31 | 5941582 | 614  | 12 | 1 | 1 | 2 | 6 | 5 | 3 | 1 | 6 | 3 | 1 |   |    |   | 5 | 2 | 5 | 7 | 2 | 4 | 4 | 5 | 5 | 6 | 5 | 5 | 4 | 4 | 5 | 3 | 6 | 6 | 2 | 1 | 1 | 1 | 1 | 1 | 7 | 5 | 5 | 2 | 3 | 2 | 1 | 1 | 1 | 2 | 1 | 2 | 1 | 4 | 4 |   |   |
| 45 | 31 | 5941582 | 659  | 12 | 1 | 1 | 2 | 6 | 1 | 6 | 1 | 3 | 3 | 1 |   |    |   | 7 | 7 | 7 | 5 | 7 | 6 | 6 | 6 | 6 | 4 | 4 | 4 | 4 | 4 | 4 | 4 | 2 | 2 | 3 | 5 | 4 | 2 | 2 | 2 | 2 | 2 | 2 | 4 | 4 | 2 | 2 | 1 | 1 | 1 | 1 | 1 | 1 | 1 | 3 |   |   |
| 46 | 31 | 5941582 | 68   | 12 | 1 | 1 | 2 | 5 | 1 | 4 | 1 | 7 | 3 | 1 |   |    |   | 7 | 7 | 7 | 4 | 5 | 2 | 6 | 6 | 7 | 4 | 4 | 4 | 4 | 7 | 7 | 7 | 6 | 1 | 7 | 1 | 2 | 2 | 1 | 1 | 7 | 7 | 1 | 1 | 7 | 7 | 6 | 4 | 1 | 2 | 2 | 2 | 7 | 7 | 4 | 6 |   |
| 47 | 31 | 5941582 | 1164 | 12 | 1 | 1 | 2 | 6 | 5 | 4 | 1 | 6 | 1 | 1 |   |    |   | 7 | 7 | 1 | 7 | 7 | 7 | 1 | 1 | 1 | 1 | 4 | 6 | 1 | 1 | 7 | 4 | 4 | 4 | 1 | 1 | 1 | 1 | 1 | 7 | 7 | 4 | 4 | 4 | 1 | 1 | 1 | 1 | 1 | 1 | 1 | 1 | 1 | 1 | 1 |   |   |
| 48 | 31 | 5941582 | 495  | 12 | 1 | 1 | 2 | 4 | 5 | 6 | 1 | 4 | 3 | 1 |   |    |   | 7 | 7 | 7 | 7 | 7 | 7 | 7 | 7 | 7 | 7 | 7 | 7 | 7 | 7 | 7 | 1 | 7 | 1 | 1 | 1 | 1 | 1 | 1 | 7 | 1 | 1 | 5 | 5 | 1 | 1 | 1 | 1 | 2 | 2 | 7 | 7 | 1 | 4 |   |   |   |
| 49 | 31 | 5941582 | 542  | 12 | 1 | 1 | 2 | 5 | 1 | 5 | 1 | 6 | 1 | 1 |   |    |   | 1 | 1 | 1 | 4 | 1 | 1 | 1 | 1 | 1 | 4 | 4 | 3 | 1 | 1 | 5 | 5 | 1 | 7 | 1 | 1 | 1 | 1 | 1 | 7 | 7 | 7 | 1 | 5 | 1 | 4 | 1 | 1 | 1 | 1 | 1 | 4 | 1 | 1 | 1 | 1 |   |
| 5  | 31 | 5941582 | 88   | 12 | 1 | 1 | 1 | 5 | 5 | 4 | 1 | 6 | 3 | 2 | 1 | 29 |   | 4 | 3 | 3 | 6 | 6 | 6 | 5 | 4 | 5 | 7 | 6 | 7 | 7 | 7 | 7 | 7 | 7 | 2 | 2 | 1 | 1 | 2 | 1 | 7 | 2 | 2 | 6 | 5 | 3 | 3 | 2 | 2 | 3 | 3 | 5 | 3 | 3 | 3 |   |   |   |
| 51 | 31 | 5941582 | 345  | 12 | 1 | 1 | 2 | 3 | 2 | 7 | 1 | 5 | 3 | 1 |   |    |   | 1 | 1 | 1 | 1 | 1 | 1 | 1 | 4 | 4 | 4 | 4 | 4 | 1 | 1 | 1 | 1 | 1 | 1 | 4 | 1 | 3 | 7 | 4 | 4 | 4 | 4 | 4 | 4 | 4 | 4 | 4 | 4 | 4 | 4 | 4 | 4 | 5 | 4 | 4 | 4 |   |
| 52 | 31 | 5941582 | 36   | 12 | 3 | 1 | 2 | 5 | 5 | 4 | 1 | 5 | 3 | 1 |   |    |   | 6 | 1 | 1 | 1 | 1 | 1 | 1 | 1 | 1 | 1 | 1 | 1 | 1 | 1 | 1 | 1 | 1 | 1 | 1 | 5 | 6 | 7 | 7 | 1 | 7 | 7 | 4 | 4 | 7 | 5 | 2 | 7 | 4 | 7 | 7 | 7 | 1 | 1 |   |   |   |
| 53 | 31 | 5941582 | 618  | 12 | 1 | 1 | 1 | 5 | 5 | 4 | 3 | 6 | 3 | 1 | 1 | 33 |   | 4 | 3 | 3 | 6 | 5 | 5 | 6 | 6 | 5 | 3 | 4 | 5 | 4 | 4 | 4 | 5 | 7 | 7 | 3 | 2 | 1 | 5 | 4 | 4 | 5 | 4 | 4 | 1 | 2 | 3 | 4 | 1 | 2 | 1 | 3 | 4 | 3 | 4 | 5 |   |   |
| 54 | 31 | 5941582 | 333  | 12 | 1 | 1 | 2 | 4 | 5 | 3 | 1 | 6 | 3 | 1 |   |    |   | 7 | 6 | 7 | 7 | 7 | 7 | 7 | 7 | 7 | 7 | 7 | 7 | 7 | 7 | 7 | 6 | 6 | 1 | 1 | 1 | 1 | 1 | 1 | 7 | 2 | 2 | 1 | 1 | 1 | 1 | 1 | 1 | 1 | 1 | 7 | 4 | 1 | 7 |   |   |   |
| 55 | 31 | 5941582 | 818  | 12 |   |   |   |   |   |   |   |   |   |   |   |    |   |   |   |   |   |   |   |   |   |   |   |   |   |   |   |   |   |   |   |   |   |   |   |   |   |   |   |   |   |   |   |   |   |   |   |   |   |   |   |   |   |   |

|    |    |         |      |    |   |   |   |   |   |   |   |   |   |   |   |    |    |   |   |   |   |   |   |   |   |   |   |   |   |   |   |   |   |   |   |   |   |   |   |   |   |   |   |   |   |   |   |   |   |   |   |   |   |   |   |   |
|----|----|---------|------|----|---|---|---|---|---|---|---|---|---|---|---|----|----|---|---|---|---|---|---|---|---|---|---|---|---|---|---|---|---|---|---|---|---|---|---|---|---|---|---|---|---|---|---|---|---|---|---|---|---|---|---|---|
| 57 | 31 | 5941582 | 318  | 12 | 1 | 1 | 2 | 5 | 5 | 6 | 1 | 6 | 5 | 1 |   |    |    | 7 | 7 | 7 | 7 | 5 | 5 | 4 | 4 | 4 | 7 | 4 | 7 | 5 | 5 | 7 | 7 | 4 | 4 | 1 | 1 | 1 | 1 | 1 | 6 | 1 | 1 | 1 | 1 | 1 | 1 | 1 | 1 | 1 | 1 | 3 | 1 | 5 |   |   |
| 58 | 31 | 5941582 | 1754 | 12 | 1 | 1 | 2 | 7 | 5 | 4 | 1 | 3 | 3 | 1 |   |    |    | 5 | 5 | 4 | 4 | 5 | 5 | 4 | 3 | 4 | 5 | 4 | 4 | 5 | 5 | 2 | 2 | 4 | 2 | 5 | 4 | 5 | 3 | 4 | 2 | 5 | 5 | 4 | 7 | 7 | 2 | 2 | 3 | 5 | 6 | 6 | 6 | 7 | 6 | 2 |
| 59 | 31 | 5941582 | 498  | 12 | 1 | 1 | 2 | 5 | 1 | 6 | 1 | 7 | 1 | 1 |   |    |    | 5 | 4 | 4 | 7 | 4 | 4 | 4 | 3 | 4 | 4 | 4 | 4 | 5 | 5 | 5 | 5 | 2 | 5 | 2 | 5 | 4 | 2 | 4 | 3 | 6 | 4 | 4 | 6 | 6 | 5 | 3 | 4 | 6 | 4 | 3 | 5 | 6 | 2 | 5 |
| 6  | 31 | 5941582 | 546  | 12 | 1 | 1 | 2 | 5 | 5 | 7 | 1 | 7 | 1 | 1 |   |    |    | 3 | 1 | 1 | 5 | 6 | 2 | 3 | 3 | 3 | 5 | 7 | 3 | 2 | 2 | 3 | 2 | 1 | 3 | 2 | 2 | 2 | 6 | 7 | 4 | 6 | 4 | 4 | 1 | 2 | 2 | 2 | 1 | 2 | 4 | 2 | 5 | 3 | 6 | 3 |
| 61 | 31 | 5941582 | 285  | 12 | 1 | 1 | 2 | 3 | 1 | 6 | 1 | 5 | 3 | 1 |   |    |    | 6 | 5 | 6 | 7 | 7 | 7 | 4 | 4 | 4 | 7 | 7 | 7 | 6 | 6 | 6 | 6 | 7 | 7 | 2 | 2 | 1 | 2 | 3 | 3 | 6 | 3 | 2 | 1 | 1 | 2 | 4 | 1 | 1 | 1 | 1 | 4 | 4 | 3 | 5 |
| 62 | 31 | 5941582 | 592  | 12 | 1 | 1 | 2 | 7 | 5 | 3 | 1 | 3 | 3 | 1 |   |    |    | 7 | 7 | 7 | 7 | 7 | 7 | 7 | 7 | 7 | 7 | 7 | 7 | 7 | 7 | 7 | 7 | 7 | 1 | 1 | 1 | 1 | 1 | 1 | 7 | 1 | 1 | 3 | 3 | 1 | 1 | 1 | 1 | 1 | 3 | 5 | 5 | 2 | 3 |   |
| 63 | 31 | 5941582 | 475  | 12 | 1 | 2 | 1 | 7 | 1 | 7 | 1 | 2 | 1 | 2 | 4 | 35 | 8  | 7 | 6 | 7 | 7 | 7 | 7 | 6 | 5 | 5 | 4 | 4 | 4 | 7 | 7 | 7 | 7 | 2 | 7 | 1 | 1 | 1 | 1 | 2 | 1 | 7 | 2 | 2 | 2 | 2 | 1 | 1 | 1 | 2 | 2 | 2 | 7 | 6 | 2 | 7 |
| 64 | 31 | 5941582 | 776  | 12 | 1 | 1 | 1 | 3 | 5 | 6 | 1 | 6 | 3 | 1 | 1 | 4  |    | 3 | 3 | 3 | 7 | 7 | 5 | 7 | 7 | 7 | 7 | 7 | 4 | 7 | 7 | 7 | 7 | 6 | 6 | 2 | 1 | 1 | 1 | 1 | 1 | 7 | 1 | 5 | 1 | 1 | 1 | 1 | 1 | 1 | 6 | 5 | 2 | 6 |   |   |
| 65 | 31 | 5941582 | 384  | 12 | 1 | 1 | 2 | 2 | 5 | 3 | 1 | 6 | 5 | 1 |   |    |    | 6 | 7 | 7 | 7 | 6 | 6 | 6 | 7 | 6 | 6 | 6 | 5 | 7 | 7 | 7 | 7 | 7 | 7 | 1 | 1 | 1 | 1 | 4 | 2 | 6 | 5 | 5 | 1 | 2 | 2 | 1 | 1 | 1 | 1 | 3 | 2 | 1 | 6 |   |
| 66 | 31 | 5941582 | 565  | 12 | 1 | 1 | 2 | 4 | 5 | 6 | 1 | 6 | 5 | 1 |   |    |    | 7 | 6 | 6 | 7 | 5 | 5 | 7 | 7 | 7 | 6 | 6 | 6 | 6 | 7 | 7 | 6 | 6 | 1 | 1 | 1 | 1 | 2 | 2 | 7 | 2 | 2 | 2 | 2 | 2 | 2 | 1 | 1 | 1 | 1 | 4 | 4 | 2 | 3 |   |
| 67 | 32 | 5941582 | -1   | 12 | 1 | 1 | 2 | 4 | 1 | 6 | 1 | 6 | 3 | 1 |   |    |    | 7 | 6 | 6 | 7 | 5 | 5 | 6 | 6 | 6 | 4 | 6 | 5 | 6 | 6 | 7 | 7 | 5 | 7 | 2 | 2 | 2 | 2 | 2 | 1 | 6 | 2 | 2 | 2 | 3 | 2 | 2 | 1 | 2 | 1 | 2 | 5 | 5 | 3 | 5 |
| 68 | 31 | 5941582 | 67   | 12 | 4 | 1 | 2 | 4 | 1 | 6 | 1 | 6 | 3 | 1 |   |    |    | 2 | 1 | 2 | 2 | 1 | 1 | 3 | 3 | 3 | 2 | 2 | 2 | 1 | 1 | 4 | 1 | 7 | 4 | 6 | 1 | 1 | 1 | 7 | 7 | 7 | 1 | 1 | 4 | 4 | 1 | 1 | 1 | 1 | 1 | 1 | 1 | 1 | 1 | 2 |
| 69 | 31 | 5941582 | 433  | 12 | 1 | 1 | 2 | 3 | 5 | 6 | 1 | 6 | 3 | 1 |   |    |    | 7 | 6 | 6 | 7 | 6 | 6 | 3 | 3 | 3 | 6 | 6 | 6 | 7 | 6 | 6 | 5 | 4 | 4 | 6 | 5 | 5 | 2 | 3 | 4 | 3 | 4 | 4 | 1 | 1 | 5 | 4 | 2 | 1 | 1 | 4 | 5 | 5 | 2 | 2 |
| 7  | 31 | 5941582 | 59   | 12 | 1 | 1 | 1 | 6 | 1 | 6 | 1 | 6 | 3 | 1 | 3 | 15 | 9  | 6 | 6 | 7 | 7 | 7 | 6 | 6 | 6 | 6 | 7 | 7 | 7 | 7 | 7 | 6 | 6 | 5 | 6 | 1 | 1 | 1 | 2 | 2 | 7 | 7 | 2 | 2 | 3 | 3 | 1 | 1 | 1 | 1 | 1 | 4 | 3 | 1 | 6 |   |
| 71 | 31 | 5941582 | 162  | 12 | 3 | 1 | 2 | 5 | 5 | 8 | 1 | 6 | 1 | 1 |   |    |    | 1 | 4 | 1 | 4 | 4 | 4 | 4 | 4 | 4 | 2 | 3 | 1 | 1 | 1 | 4 | 4 | 1 | 1 | 7 | 7 | 7 | 1 | 7 | 3 | 1 | 3 | 3 | 5 | 4 | 3 | 3 | 3 | 4 | 4 | 3 | 7 | 7 | 3 | 3 |
| 72 | 31 | 5941582 | 392  | 12 | 1 | 1 | 1 | 6 | 5 | 4 | 2 | 6 | 1 | 1 | 1 | 18 | 18 | 6 | 6 | 6 | 6 | 6 | 7 | 2 | 1 | 2 | 3 | 3 | 3 | 5 | 5 | 6 | 6 | 7 | 4 | 1 | 5 | 1 | 2 | 2 | 5 | 5 | 3 | 2 | 3 | 4 | 2 | 2 | 4 | 6 | 4 | 4 | 4 | 4 | 2 | 4 |
| 73 | 31 | 5941582 | 8    | 12 | 1 | 1 | 2 | 6 | 1 | 3 | 1 | 3 | 3 | 1 |   |    |    | 3 | 3 | 2 | 3 | 5 | 2 | 3 | 3 | 3 | 4 | 3 | 3 | 1 | 1 | 4 | 3 | 7 | 7 | 3 | 3 | 1 | 2 | 2 | 2 | 6 | 3 | 3 | 1 | 1 | 1 | 1 | 1 |   | 1 | 2 | 2 |   | 2 |   |
| 74 | 31 | 5941582 | 654  | 12 | 1 | 1 | 1 | 5 | 5 | 4 | 2 | 6 | 3 | 1 | 1 | 6  | 17 | 7 | 7 | 7 | 7 | 7 | 7 | 5 | 5 | 4 | 7 | 6 | 7 | 7 | 7 | 7 | 7 | 5 | 7 | 2 | 1 | 1 | 1 | 2 | 2 | 7 | 1 | 1 | 1 | 1 | 1 | 1 | 1 | 1 | 4 | 2 | 1 | 7 |   |   |
| 75 | 31 | 5941582 | 477  | 12 | 1 | 2 | 2 | 7 | 1 | 6 | 1 | 3 | 3 | 1 |   |    |    | 7 | 7 | 6 | 7 | 7 | 7 | 5 | 5 | 5 | 7 | 6 | 7 | 7 | 7 | 6 | 6 | 7 | 7 | 5 | 7 | 1 | 1 | 1 | 1 | 7 | 1 | 1 | 3 | 1 | 1 | 1 | 1 | 1 | 1 | 6 | 7 | 1 | 7 |   |
| 76 | 31 | 5941582 | 613  | 12 | 1 | 1 | 2 | 6 | 1 | 6 | 1 | 3 | 1 | 2 |   |    |    | 7 | 4 | 4 | 7 | 7 | 7 | 7 |   | 7 |   |   |   | 7 | 7 | 7 | 7 | 7 | 7 | 1 | 1 | 1 | 1 | 1 | 2 | 6 | 2 | 3 | 1 | 5 | 1 | 1 | 1 | 1 | 1 | 1 | 3 | 1 | 1 | 6 |
| 77 | 31 | 5941582 | 577  | 12 | 1 | 1 | 2 | 4 | 1 | 6 | 1 | 6 | 3 | 1 |   |    |    | 6 | 6 | 7 | 7 | 4 | 4 | 6 | 6 | 6 | 6 | 7 | 5 | 6 | 5 | 6 | 6 | 3 | 4 | 1 | 3 | 1 | 1 | 1 | 2 | 6 | 3 | 3 | 1 | 1 | 5 | 4 | 1 | 2 | 3 | 1 | 5 | 3 | 1 | 2 |
| 78 | 31 | 5941582 | 551  | 12 | 1 | 1 | 2 | 6 | 5 | 4 | 1 | 4 | 3 | 1 |   |    |    | 7 | 7 | 7 | 7 | 7 | 7 | 7 | 7 | 7 | 7 | 7 | 7 | 7 | 7 | 7 | 7 | 7 | 1 | 7 | 1 | 1 | 1 | 1 | 7 | 1 | 1 | 4 | 5 | 2 | 2 | 1 | 1 | 1 | 1 | 7 | 7 | 2 | 2 |   |
| 79 | 31 | 5941582 | 791  | 12 | 1 | 1 | 2 | 6 | 5 | 4 | 1 | 3 | 3 | 2 |   |    |    | 7 | 7 | 7 | 7 | 7 | 6 | 6 | 7 | 7 | 6 | 6 | 6 | 7 | 7 | 7 | 6 | 7 | 7 | 6 | 2 | 1 | 1 | 1 | 1 | 7 | 1 | 1 | 6 | 5 | 6 | 4 | 4 | 4 | 4 | 4 | 5 | 4 | 4 |   |
| 8  | 31 | 5941582 | 358  | 12 | 1 | 1 | 1 | 6 | 1 | 4 | 1 | 3 | 3 | 2 | 3 | 45 |    | 7 | 6 | 5 | 6 | 6 | 6 | 7 | 6 | 6 | 6 | 6 | 6 | 6 | 6 | 5 | 6 | 6 | 6 | 1 | 1 | 1 | 1 | 1 | 1 | 7 | 2 | 2 | 2 | 2 | 1 | 1 | 1 | 1 | 2 | 2 | 4 | 3 | 3 | 2 |
| 81 | 31 | 5941582 | 1147 | 12 | 4 | 1 | 2 | 7 | 1 | 8 | 3 | 5 | 3 | 1 |   |    |    | 1 | 2 | 1 | 1 | 4 | 3 | 1 | 1 | 1 | 1 | 1 | 1 | 1 | 1 | 3 | 1 | 1 | 7 | 7 | 7 | 7 | 7 | 7 | 1 | 6 | 6 | 1 | 1 | 2 | 1 | 1 | 1 | 2 | 1 | 4 | 2 | 3 | 1 |   |
| 82 | 31 | 5941582 | 567  | 11 | 3 | 1 | 2 | 3 | 1 | 7 | 6 | 5 | 1 | 2 |   |    |    | 3 | 4 | 4 | 1 |   | 2 | 6 | 5 | 6 | 4 | 5 | 4 | 1 | 1 | 4 | 4 | 7 | 7 | 6 | 1 | 1 | 1 | 7 | 1 | 5 | 3 | 3 | 1 | 1 | 4 | 1 | 1 | 1 | 1 | 1 | 4 | 5 | 1 | 5 |
| 83 | 31 | 5941582 | 1288 | 12 | 1 | 1 | 2 | 6 | 1 | 6 | 1 | 5 | 1 | 1 |   |    |    | 6 | 6 | 6 | 5 | 6 | 5 | 1 | 1 | 2 | 5 | 5 | 5 | 6 | 6 | 7 | 5 | 7 | 7 | 1 | 1 | 1 | 1 | 3 | 2 | 7 | 1 | 2 | 1 | 1 | 1 | 1 | 1 | 1 | 1 | 4 | 2 | 1 | 2 |   |
| 84 | 31 | 5941582 | 452  | 12 | 1 | 1 | 2 | 6 | 1 | 6 | 1 | 3 | 3 | 1 |   |    |    | 2 | 2 | 2 | 2 | 6 | 6 | 6 | 6 | 6 | 3 | 3 | 3 | 5 | 5 | 5 | 6 | 6 | 6 | 2 | 2 | 2 | 2 | 6 | 2 | 6 | 1 | 1 | 1 | 1 | 1 | 1 | 1 | 1 | 6 | 6 | 1 | 1 |   |   |
| 85 | 31 | 5941582 | 8    | 12 | 1 | 1 | 1 | 5 | 5 | 6 | 1 | 6 | 1 | 1 | 3 | 36 |    | 7 | 7 | 7 | 6 | 7 | 6 | 6 | 6 | 6 |   |   |   | 7 | 7 | 6 | 4 | 5 | 6 | 1 | 1 | 1 | 1 | 1 | 2 | 7 | 3 | 4 | 3 | 3 | 1 | 1 | 1 | 1 | 2 | 1 | 4 | 4 | 2 |   |
| 86 | 31 | 5941582 | 1181 | 12 | 1 | 1 | 2 | 7 | 5 | 3 | 1 | 3 | 3 | 2 |   |    |    | 7 | 7 | 7 | 7 | 5 | 5 | 7 | 7 | 7 | 7 | 7 | 7 | 7 | 7 | 7 | 7 | 3 | 7 | 1 | 1 | 1 | 1 | 1 | 1 | 7 | 5 | 2 | 3 | 5 | 1 | 1 | 1 | 1 | 1 | 1 | 1 | 1 | 1 | 1 |

|     |    |         |      |    |   |   |   |   |   |   |   |   |   |   |   |    |   |   |   |   |   |   |   |   |   |   |   |   |   |   |   |   |   |   |   |   |   |   |   |   |   |   |   |   |   |   |   |   |   |   |   |   |   |   |   |   |   |
|-----|----|---------|------|----|---|---|---|---|---|---|---|---|---|---|---|----|---|---|---|---|---|---|---|---|---|---|---|---|---|---|---|---|---|---|---|---|---|---|---|---|---|---|---|---|---|---|---|---|---|---|---|---|---|---|---|---|---|
| 87  | 31 | 5941582 | 514  | 12 | 1 | 1 | 2 | 2 | 5 | 3 | 1 | 6 | 3 | 1 |   |    |   | 5 | 5 | 3 | 6 | 6 | 2 | 4 | 3 | 4 | 2 | 2 | 2 | 5 | 5 | 5 | 2 | 6 | 6 | 3 | 1 | 1 | 2 | 2 | 3 | 6 | 7 | 7 | 2 | 2 | 2 | 2 | 2 | 2 | 6 | 2 | 3 | 5 | 4 | 3 | 5 |
| 88  | 31 | 5941582 | 584  | 12 | 1 | 1 | 2 | 3 | 5 | 6 | 1 | 6 | 5 | 1 |   |    |   | 6 | 5 | 5 | 6 | 6 | 6 | 6 | 6 | 6 | 7 | 7 | 4 | 6 | 6 | 5 | 5 | 5 | 5 | 1 | 1 | 1 | 1 | 7 | 5 | 7 | 2 | 2 | 1 | 1 | 1 | 1 | 1 | 1 | 1 | 3 | 2 | 3 | 5 |   |   |
| 89  | 32 | 5941582 | -1   | 12 | 1 | 1 | 2 | 6 | 5 | 6 | 1 | 3 | 3 | 1 |   |    |   | 5 | 2 | 4 | 5 | 7 | 7 | 7 | 7 | 7 | 1 | 1 | 1 | 4 | 4 | 3 | 2 | 5 | 7 | 1 | 1 | 1 | 1 | 5 | 1 | 7 | 2 | 2 | 2 | 2 | 1 | 2 | 1 | 1 | 2 | 1 | 3 | 3 | 4 | 2 |   |
| 9   | 31 | 5941582 | 5    | 12 | 1 | 1 | 2 | 6 | 5 | 6 | 1 | 4 | 3 | 1 |   |    |   | 5 | 4 | 4 | 6 | 5 | 4 | 3 | 4 | 4 | 6 | 4 | 6 | 5 | 5 | 4 | 4 | 7 | 5 | 5 | 2 | 2 | 3 | 4 | 4 | 6 | 2 | 2 | 2 | 2 | 2 | 2 | 2 | 4 | 2 | 3 | 1 | 1 | 4 |   |   |
| 91  | 31 | 5941582 | 1742 | 12 | 5 | 1 | 1 | 6 | 1 | 4 | 5 | 6 | 4 | 2 | 3 | 44 | 8 | 7 | 6 | 7 | 7 | 6 | 6 | 7 | 6 | 6 | 6 | 6 | 5 | 7 | 6 | 7 | 7 | 7 | 7 | 1 | 2 | 1 | 2 | 2 | 2 | 7 | 3 | 4 | 5 | 6 | 5 | 6 | 4 | 6 | 5 | 2 | 6 | 7 | 4 | 3 |   |
| 92  | 31 | 5941582 | 457  | 12 | 1 | 1 | 2 | 6 | 1 | 6 | 1 | 3 | 3 | 1 |   |    |   | 7 | 7 | 7 | 6 | 7 | 7 | 6 | 7 | 7 | 4 | 4 | 3 | 7 | 7 | 7 | 6 | 7 | 7 | 1 | 1 | 1 | 1 | 1 | 1 | 7 | 2 | 2 | 1 | 1 | 1 | 1 | 1 | 1 | 1 | 6 | 6 | 2 | 6 |   |   |
| 93  | 31 | 5941582 | 145  | 12 | 1 | 1 | 2 | 6 | 1 | 9 | 3 | 5 | 2 | 1 |   |    |   | 7 | 7 | 7 | 7 | 7 | 7 |   |   |   |   |   | 7 |   | 7 | 7 | 4 | 4 |   |   | 4 |   |   |   |   |   | 4 | 4 | 4 | 1 | 4 | 1 | 1 | 4 | 4 | 7 | 7 | 1 | 1 |   |   |
| 94  | 32 | 5941582 | -1   | 12 | 1 | 1 | 2 | 6 | 5 | 4 | 1 | 3 | 1 | 1 |   |    |   | 7 | 6 | 7 | 7 | 7 | 7 | 6 | 6 | 6 | 6 | 6 | 6 | 7 | 7 | 7 | 7 | 6 | 6 | 2 | 6 | 2 | 1 | 1 | 2 | 6 | 2 | 2 | 2 | 2 | 2 | 2 | 2 | 2 | 2 | 6 | 4 | 2 | 2 |   |   |
| 95  | 31 | 5941582 | 614  | 12 | 1 | 1 | 2 | 7 | 5 | 6 | 1 | 2 | 3 | 1 |   |    |   | 7 | 7 | 7 | 7 | 7 | 7 | 7 | 7 | 7 | 7 | 7 | 7 | 7 | 7 | 7 | 7 | 7 | 1 | 1 | 1 | 1 | 1 | 1 | 7 | 2 | 2 | 3 | 5 | 1 | 1 | 1 | 1 | 2 | 1 | 3 | 4 | 2 | 3 |   |   |
| 96  | 31 | 5941582 | 524  | 12 | 1 | 1 | 1 | 4 | 5 | 8 | 1 | 6 | 3 | 1 | 1 | 1  |   | 7 | 6 | 7 | 6 | 4 | 3 | 5 | 5 | 5 | 7 | 7 | 6 | 7 | 7 | 5 | 4 | 4 | 6 | 2 | 1 | 1 | 1 | 2 | 1 | 7 | 4 | 4 | 3 | 3 | 1 | 1 | 1 | 2 | 2 | 2 | 6 | 2 | 2 | 1 |   |
| 97  | 31 | 5941582 | 147  | 12 | 1 | 1 | 2 | 6 | 1 | 8 | 1 | 2 | 3 | 1 |   |    |   | 7 | 1 | 1 | 1 | 1 | 1 | 7 | 7 | 6 | 1 | 4 | 2 | 1 | 1 | 1 | 1 | 7 | 6 | 2 | 1 | 1 | 2 | 7 | 2 | 2 |   | 4 | 3 | 2 | 1 | 4 | 1 | 4 | 6 | 7 | 7 | 7 | 4 | 6 |   |
| 98  | 31 | 5941582 | 1573 | 12 | 1 | 1 | 2 | 6 | 5 | 9 | 1 | 3 | 3 | 1 |   |    |   | 3 | 3 | 3 | 2 | 4 | 3 | 1 | 1 | 1 | 3 | 3 | 3 | 3 | 3 | 3 | 3 | 3 | 3 |   |   |   |   |   |   |   |   |   |   |   |   |   |   |   |   |   |   |   |   |   |   |
| 99  | 31 | 5941582 | 165  | 12 | 1 | 1 | 2 | 5 | 1 | 4 | 1 | 5 | 3 | 2 |   |    |   | 6 | 6 | 6 | 4 | 5 | 5 | 4 | 4 | 5 | 4 | 4 | 4 | 6 | 6 | 7 | 6 | 3 | 4 | 4 | 5 | 3 | 1 | 1 | 1 | 7 | 4 | 4 | 5 | 5 | 5 | 6 | 2 | 2 | 6 | 2 | 6 | 5 | 2 | 5 |   |
| 1   | 31 | 5941582 | 3294 | 12 | 1 | 1 | 2 | 5 | 5 | 4 | 1 | 5 | 3 | 1 |   |    |   | 7 | 7 | 7 | 7 | 7 | 7 | 7 | 7 | 7 | 4 | 7 | 4 | 7 | 7 | 7 | 7 | 1 | 7 | 1 | 1 | 1 | 1 | 1 | 7 | 4 | 4 | 6 | 6 | 6 | 6 | 4 | 4 | 7 | 5 | 7 | 7 | 1 | 6 |   |   |
| 11  | 31 | 5941582 | 844  | 12 | 1 | 1 | 2 | 3 | 5 | 6 | 1 | 6 | 5 | 1 |   |    |   | 6 | 4 | 5 | 6 | 6 | 6 | 6 | 5 | 6 | 7 | 6 | 7 | 6 | 6 | 6 | 6 | 5 | 4 | 1 | 1 | 1 | 2 | 3 | 2 | 7 | 1 | 1 | 1 | 1 | 1 | 1 | 1 | 1 | 1 | 5 | 5 | 1 | 4 |   |   |
| 12  | 31 | 5941582 | 566  | 12 | 1 | 1 | 1 | 7 | 5 | 4 | 1 | 4 | 1 | 1 | 3 | 4  |   | 7 | 6 | 6 | 7 | 7 | 7 | 5 | 6 | 6 | 7 | 7 | 7 | 7 | 7 | 7 |   | 7 | 7 | 1 | 1 | 1 | 1 | 1 | 7 | 7 | 7 | 1 | 1 | 1 | 1 | 1 | 1 | 1 | 7 | 7 | 1 | 1 |   |   |   |
| 13  | 31 | 5941582 | 581  | 12 | 1 | 1 | 2 |   | 1 | 6 | 1 | 3 | 5 | 1 |   |    |   | 2 | 2 | 2 | 6 | 4 | 4 | 1 | 2 | 1 | 2 | 2 | 2 | 2 | 6 | 6 | 6 | 7 | 7 | 3 | 2 | 1 | 5 | 7 | 7 | 5 | 2 | 2 | 2 | 1 | 1 | 1 | 1 | 1 | 2 | 2 | 2 | 3 | 2 | 1 |   |
| 14  | 31 | 5941582 | 524  | 12 | 3 | 1 | 2 | 3 | 5 | 6 | 1 | 6 | 7 | 1 |   |    |   | 1 | 5 | 5 | 3 | 4 | 4 | 3 | 3 | 3 | 3 | 3 | 3 | 3 | 3 | 1 | 2 | 1 | 3 | 5 | 3 | 5 | 2 | 6 | 5 | 2 | 1 | 1 | 1 | 1 | 1 | 1 | 1 | 1 | 1 | 1 | 1 | 1 |   |   |   |
| 15  | 31 | 5941582 | 1483 | 12 | 1 | 1 | 2 | 5 | 5 | 6 | 1 | 4 | 3 | 1 |   |    |   | 7 | 7 | 7 | 7 | 7 | 7 | 7 | 7 | 7 | 7 | 7 | 7 | 7 | 7 | 7 | 7 | 7 | 1 | 1 | 1 | 1 | 1 | 1 | 7 | 1 | 1 | 1 | 1 | 1 | 1 | 1 | 2 | 1 | 1 | 2 | 2 | 1 | 1 |   |   |
| 16  | 31 | 5941582 | 123  | 12 | 1 | 1 | 2 | 7 | 1 | 7 | 5 | 2 | 3 | 1 |   |    |   | 7 | 7 | 7 | 7 | 7 | 7 | 7 | 7 |   | 7 | 7 | 7 | 7 | 7 | 7 | 7 | 5 | 4 | 1 | 7 | 1 |   |   |   |   |   |   |   | 1 | 1 | 1 | 1 | 2 | 2 | 7 | 7 | 1 | 7 |   |   |
| 17  | 31 | 5941582 | 311  | 12 | 1 | 1 | 2 | 3 | 5 | 6 | 1 | 7 | 3 | 1 |   |    |   | 7 | 5 | 6 | 6 | 4 | 5 | 6 | 6 | 6 | 5 | 5 | 4 | 7 | 7 | 7 | 6 | 5 | 5 | 3 | 3 | 2 | 2 | 1 | 1 | 6 | 4 | 4 | 2 | 2 | 7 | 5 | 2 | 5 | 4 | 6 | 7 | 7 | 4 | 2 |   |
| 18  | 31 | 5941582 | 1329 | 12 | 1 | 1 | 2 | 7 | 1 | 6 | 1 | 2 | 3 | 1 |   |    |   | 6 | 1 | 1 | 7 | 7 | 6 | 5 | 5 | 5 |   |   |   | 1 | 1 | 3 | 3 | 1 | 1 | 1 | 4 | 5 | 1 | 7 | 2 | 4 | 1 | 1 | 3 | 3 | 1 | 1 | 1 | 1 | 6 | 5 | 5 | 1 | 1 |   |   |
| 19  | 31 | 5941582 | 169  | 12 | 1 | 6 | 2 | 6 | 5 | 3 | 5 | 4 | 3 | 1 |   |    |   | 7 | 1 | 1 | 7 | 1 | 7 | 1 | 1 | 1 | 4 | 4 | 4 | 1 | 1 | 2 | 2 | 1 | 1 | 7 | 2 | 4 | 7 | 7 | 7 | 4 | 1 | 1 | 4 | 7 | 1 | 1 | 3 | 4 | 4 | 4 | 7 | 7 | 2 | 4 |   |
| 11  | 31 | 5941582 | 1342 | 12 | 1 | 1 | 2 | 7 | 1 | 4 | 4 | 2 | 3 | 1 |   |    |   | 7 | 7 | 7 | 7 | 5 | 7 | 4 | 5 | 5 | 4 | 4 | 3 | 7 | 5 | 6 | 5 | 5 | 5 | 3 | 4 | 4 | 5 | 7 | 5 | 4 | 4 | 4 | 5 | 6 | 2 | 2 | 5 | 2 | 3 | 3 | 7 | 7 | 4 | 3 |   |
| 111 | 31 | 5941582 | 518  | 12 | 1 | 1 | 2 | 4 | 5 | 7 | 1 | 7 | 1 | 1 |   |    |   | 7 | 6 | 7 | 7 | 7 | 6 | 7 | 7 | 7 | 7 | 7 | 7 | 7 | 5 | 4 | 4 | 6 | 1 | 1 | 1 | 1 | 1 | 1 | 7 | 2 | 2 | 2 | 2 | 2 | 3 | 1 | 1 | 2 | 1 | 5 | 5 | 2 | 2 |   |   |
| 112 | 31 | 5941582 | 455  | 12 | 1 | 1 | 2 | 2 | 5 | 5 | 1 | 5 | 3 | 1 |   |    |   | 2 | 2 | 3 | 1 | 2 | 3 | 6 | 5 | 6 | 5 | 5 | 5 | 5 | 6 | 5 | 4 | 7 | 7 | 2 | 2 | 1 | 2 | 4 | 3 | 7 | 1 | 1 | 2 | 1 | 1 | 1 | 1 | 1 | 2 | 3 | 4 | 2 | 5 |   |   |
| 113 | 31 | 5941582 | 48   | 12 | 1 | 1 | 2 | 3 | 5 | 6 | 1 | 4 | 5 | 1 |   |    |   | 7 | 4 | 6 | 4 | 5 | 5 | 3 | 3 | 3 | 5 | 5 | 5 | 4 | 4 | 4 | 3 | 7 | 7 | 1 | 2 | 1 | 2 | 2 | 5 | 6 | 3 | 3 | 2 | 2 | 2 | 2 | 1 | 1 | 2 | 2 | 3 | 3 | 3 | 3 |   |
| 114 | 31 | 5941582 | 842  | 12 | 1 | 1 | 2 | 5 | 5 | 6 | 1 | 6 | 1 | 3 |   |    |   | 5 | 4 | 7 | 7 | 6 | 6 | 7 | 7 | 7 |   |   |   | 7 | 7 | 7 | 7 | 3 | 4 | 2 | 3 | 1 | 1 | 1 | 1 | 7 |   |   | 3 | 4 | 4 | 4 | 2 | 3 | 2 | 2 | 6 | 5 | 1 | 5 |   |
| 115 | 31 | 5941582 | 39   | 12 | 1 | 1 | 2 | 5 | 5 | 6 | 1 | 6 | 6 | 1 |   |    |   | 4 | 2 | 2 | 5 | 4 | 4 | 3 | 1 | 3 | 5 | 5 | 4 | 2 | 3 | 7 | 5 | 2 | 3 | 4 | 6 | 3 | 2 | 3 | 3 | 5 | 4 | 4 | 5 | 5 | 2 | 2 | 2 | 2 | 2 | 4 | 3 | 2 | 2 |   |   |
| 116 | 31 | 5941582 | 141  | 12 | 1 | 1 | 2 | 6 | 5 | 4 | 1 | 5 | 3 | 1 |   |    |   | 7 | 4 | 4 | 7 | 7 | 7 | 3 |   |   |   |   |   |   |   |   |   |   |   |   |   |   |   |   |   |   |   |   |   |   |   |   |   |   |   |   |   |   |   |   |   |

|     |    |         |      |    |   |   |   |   |   |   |   |   |   |   |   |    |   |   |   |   |   |   |   |   |   |   |   |   |   |   |   |   |   |   |   |   |   |   |   |   |   |   |   |   |   |   |   |   |   |   |   |   |   |   |   |   |   |   |
|-----|----|---------|------|----|---|---|---|---|---|---|---|---|---|---|---|----|---|---|---|---|---|---|---|---|---|---|---|---|---|---|---|---|---|---|---|---|---|---|---|---|---|---|---|---|---|---|---|---|---|---|---|---|---|---|---|---|---|---|
| 117 | 31 | 5941582 | 712  | 12 | 1 | 1 | 2 | 6 | 5 | 6 | 1 | 4 | 3 | 1 |   |    |   | 7 |   |   |   | 7 | 7 | 5 | 5 | 5 | 6 | 6 | 6 | 7 | 6 | 5 | 4 | 7 | 7 | 2 | 2 | 1 | 1 | 1 | 2 | 6 | 4 | 4 | 1 | 1 | 1 | 1 | 1 | 1 | 1 | 6 | 2 | 4 | 4 | 2 | 2 |   |
| 118 | 31 | 5941582 | 466  | 12 | 1 | 1 | 2 | 5 | 5 | 6 | 1 | 6 | 3 | 1 |   |    |   | 5 | 3 | 6 | 7 | 4 | 7 | 6 | 6 | 6 | 6 | 6 | 6 | 6 | 6 | 4 | 4 | 4 | 1 | 2 | 1 | 1 | 1 | 1 | 7 | 4 | 4 | 3 | 3 | 4 | 2 | 2 | 2 | 2 | 2 | 6 | 4 | 3 | 3 |   |   |   |
| 119 | 31 | 5941582 | 449  | 12 | 1 | 1 | 2 | 5 | 5 | 4 | 1 | 4 | 3 | 1 |   |    |   | 5 | 3 | 5 | 7 | 5 | 5 | 1 | 1 | 1 | 3 | 3 | 1 | 5 | 3 | 7 | 7 | 7 | 7 | 1 | 1 | 1 | 1 | 7 | 1 | 7 | 1 | 1 | 1 | 7 | 1 | 1 | 1 | 1 | 1 | 7 | 1 | 3 |   |   |   |   |
| 12  | 31 | 5941582 | 493  | 12 | 1 | 1 | 2 | 2 | 5 | 3 | 3 | 7 | 2 | 1 |   |    |   | 3 | 6 | 5 | 4 | 2 | 1 | 7 | 7 | 7 | 4 | 5 | 6 | 6 | 7 | 7 | 5 | 5 | 7 | 1 | 1 | 1 | 2 | 2 | 2 | 6 | 4 | 3 | 1 | 1 | 2 | 2 | 1 | 1 | 1 | 1 | 5 | 2 | 3 | 6 |   |   |
| 121 | 31 | 5941582 | 747  | 12 | 1 | 1 | 2 | 6 | 5 | 3 | 1 | 3 | 3 | 1 |   |    |   | 7 | 7 | 7 | 7 | 7 | 7 | 5 | 5 | 5 | 6 | 6 | 7 | 7 | 7 | 7 | 7 | 7 | 7 | 1 | 1 | 1 | 1 | 1 | 1 | 7 | 1 | 1 | 1 | 1 | 1 | 1 | 1 | 1 | 3 | 3 | 1 | 1 |   |   |   |   |
| 122 | 31 | 5941582 | 341  | 12 | 1 | 1 | 2 | 4 | 5 | 6 | 1 | 6 | 3 | 1 |   |    |   | 5 | 5 | 5 | 7 | 6 | 5 | 6 | 6 | 4 | 7 | 7 | 7 | 7 | 7 | 7 | 5 | 6 | 6 | 1 | 1 | 1 | 1 | 1 | 1 | 7 | 6 | 6 | 3 | 4 | 3 | 1 | 1 | 1 | 3 | 2 | 5 | 5 | 3 | 1 |   |   |
| 123 | 31 | 5941582 | 229  | 12 | 1 | 1 | 2 | 6 | 5 | 8 | 1 | 5 | 1 | 1 |   |    |   | 7 | 7 | 7 | 2 | 7 | 2 | 4 | 7 | 6 | 5 | 5 | 4 | 4 | 4 | 5 | 7 | 1 | 1 | 7 | 7 | 7 | 4 | 1 | 7 | 5 | 1 | 1 | 7 | 7 | 7 | 7 | 4 | 7 | 7 | 7 | 3 | 4 |   |   |   |   |
| 124 | 31 | 5941582 | 969  | 12 | 1 | 1 | 2 | 5 | 5 | 3 | 1 | 7 | 1 | 1 |   |    |   | 1 | 3 | 4 | 7 | 7 | 6 | 7 | 7 | 7 | 7 | 4 | 2 | 3 | 3 | 6 | 3 | 3 | 3 | 4 | 4 | 3 | 7 | 7 | 4 | 5 | 5 | 5 | 2 | 4 | 4 | 3 | 1 | 2 | 2 | 4 | 5 | 4 | 3 | 5 |   |   |
| 125 | 31 | 5941582 | 416  | 12 | 1 | 1 | 2 | 6 | 5 | 3 | 1 | 6 | 1 | 1 |   |    |   | 7 | 5 | 3 | 7 | 3 | 3 | 2 | 3 | 2 | 4 | 3 | 3 | 3 | 5 | 5 | 3 | 5 | 5 | 1 | 2 | 1 | 3 | 5 | 5 | 6 | 2 | 2 | 5 | 6 | 2 | 2 | 2 | 1 | 3 | 3 | 7 | 3 | 2 | 3 |   |   |
| 126 | 31 | 5941582 | 1898 | 12 | 1 | 1 | 2 | 6 | 5 | 3 | 1 | 3 | 3 | 2 |   |    |   | 7 | 4 | 4 | 7 | 4 | 4 | 6 | 6 | 6 | 7 | 7 | 7 | 7 | 7 | 7 | 7 | 7 | 1 | 1 | 1 | 1 | 1 | 1 | 7 | 7 | 1 | 2 | 4 | 1 | 1 | 1 | 1 | 3 | 3 | 4 | 4 | 1 | 4 |   |   |   |
| 127 | 31 | 5941582 | 656  | 12 | 1 | 1 | 2 | 6 | 5 | 4 | 1 | 6 | 6 | 1 |   |    |   | 7 | 2 | 6 | 7 | 6 | 6 | 7 |   | 6 | 7 |   |   | 6 | 6 | 5 | 5 | 6 | 6 | 1 | 1 | 1 | 2 | 3 | 2 |   | 4 | 4 | 5 | 7 | 1 | 1 | 1 | 4 | 5 | 5 | 5 | 6 | 1 | 1 |   |   |
| 128 | 31 | 5941582 | 526  | 12 | 4 | 1 | 2 | 2 | 5 | 3 | 1 | 6 | 6 | 2 |   |    |   | 4 | 1 | 4 | 1 | 1 | 1 | 1 | 1 | 1 | 1 | 1 | 1 | 1 | 1 | 1 | 1 | 7 | 6 | 1 | 1 | 1 | 1 | 4 | 7 | 7 | 4 | 2 | 1 | 1 | 1 | 1 | 1 | 1 | 2 | 1 | 1 | 1 | 1 | 1 |   |   |
| 129 | 31 | 5941582 | 651  | 12 | 1 | 1 | 1 | 3 | 5 | 5 | 1 | 6 | 3 | 1 | 1 | 4  |   | 7 | 3 | 6 | 3 | 7 | 5 | 7 | 3 | 7 | 3 | 3 | 3 | 7 | 7 | 7 | 4 | 7 | 5 | 1 | 2 | 1 | 1 | 1 | 1 | 6 | 1 | 1 | 1 | 1 | 1 | 1 | 1 | 1 | 1 | 2 | 6 | 6 | 1 | 7 |   |   |
| 13  | 31 | 5941582 | 1413 | 12 | 1 | 1 | 2 | 6 | 5 | 4 | 1 | 3 | 3 | 1 |   |    |   | 7 | 7 | 7 | 7 | 7 | 7 | 7 | 7 | 7 | 7 | 7 | 7 | 7 | 7 | 7 | 5 | 4 | 7 | 1 | 1 | 1 | 1 | 1 | 1 | 7 | 5 | 5 | 7 | 7 | 2 | 2 | 1 | 1 | 2 | 1 | 7 | 4 | 1 | 3 |   |   |
| 131 | 31 | 5941582 | 412  | 11 | 1 | 1 | 2 | 5 | 5 | 6 | 1 | 5 | 1 | 1 |   |    |   | 4 | 1 | 3 | 2 | 5 | 4 | 7 | 7 | 7 | 1 | 1 | 1 | 2 | 2 | 1 | 5 | 6 | 4 | 1 | 2 | 1 | 1 | 4 | 1 | 7 | 1 | 1 | 1 | 2 | 1 | 1 | 1 | 1 | 1 | 1 | 2 | 4 | 1 | 1 |   |   |
| 132 | 31 | 5941582 | 466  | 12 | 1 | 1 | 2 | 6 | 5 | 3 | 1 | 3 | 3 | 1 |   |    |   | 7 | 6 | 6 | 7 | 6 | 6 | 5 | 5 | 5 | 6 | 6 | 7 | 7 | 7 | 7 | 7 | 7 | 7 | 4 | 2 | 1 | 4 | 1 | 1 | 1 | 7 | 4 | 6 | 6 | 6 | 6 | 7 | 7 | 2 | 6 | 7 | 5 | 7 | 7 | 5 | 6 |
| 133 | 31 | 5941582 | 157  | 12 | 1 | 1 | 2 | 6 | 5 | 6 | 1 | 4 | 3 | 1 |   |    |   | 3 | 3 | 3 | 2 | 2 | 2 | 3 | 3 | 3 | 4 | 4 | 4 | 3 | 4 | 2 | 3 | 5 | 2 | 6 | 5 | 4 | 5 | 7 | 4 | 5 | 3 | 4 | 2 | 2 | 1 | 1 | 1 | 1 | 1 | 2 | 6 | 3 | 1 | 1 |   |   |
| 134 | 31 | 5941582 | 595  | 12 | 1 | 1 | 1 | 6 | 5 | 6 | 1 | 6 | 3 | 1 | 3 | 35 | 1 | 7 | 7 | 7 | 7 | 7 | 7 | 7 | 7 | 7 | 7 | 7 | 7 | 7 | 7 | 7 |   | 7 | 1 | 1 | 1 | 1 | 1 | 1 | 7 | 1 | 1 | 4 | 4 | 1 | 1 | 1 | 1 | 1 | 1 | 1 | 5 | 5 | 1 | 7 |   |   |
| 135 | 31 | 5941582 | 869  | 12 | 1 | 1 | 2 | 6 | 5 | 3 | 1 | 3 | 1 | 1 |   |    |   | 5 | 5 | 5 | 7 | 7 | 6 | 5 | 2 | 4 | 4 | 2 | 4 | 5 | 6 | 7 | 7 | 5 | 5 | 1 | 1 | 1 | 1 | 1 | 6 | 7 | 6 | 7 | 5 | 7 | 1 | 1 | 1 | 1 | 1 | 1 | 3 | 2 | 1 | 3 |   |   |
| 136 | 31 | 5941582 | 46   | 12 | 1 | 1 | 2 |   | 5 | 3 | 1 | 5 | 3 | 1 |   |    |   | 7 | 6 | 7 | 7 | 7 | 3 | 4 | 4 | 5 | 7 | 5 | 5 | 7 | 7 | 7 | 6 | 7 | 7 | 6 | 1 | 1 | 1 | 1 | 2 | 7 | 3 | 3 | 1 | 7 | 1 | 1 | 1 | 1 | 1 | 1 | 7 | 7 | 1 | 4 |   |   |
| 137 | 31 | 5941582 | 645  | 12 | 3 | 1 | 2 | 6 | 5 | 5 | 6 | 4 | 3 | 2 |   |    |   | 2 | 1 | 1 | 1 | 1 | 1 | 4 | 4 | 5 | 2 | 2 | 3 | 1 | 1 | 2 | 3 | 1 | 1 | 7 | 6 | 2 | 1 | 7 | 2 | 6 | 4 | 4 | 2 | 2 | 2 | 2 | 2 | 4 | 2 | 2 | 4 | 4 | 3 | 2 |   |   |
| 138 | 32 | 5941582 | -1   | 12 | 3 | 1 | 2 | 4 | 5 | 6 | 1 | 5 | 3 | 1 |   |    |   | 7 | 5 | 5 | 5 | 6 | 6 | 6 | 5 | 6 | 7 | 7 | 7 | 7 | 7 | 7 | 6 | 6 | 6 | 1 | 1 | 1 | 1 | 1 | 7 | 2 | 2 | 1 | 1 | 1 | 1 | 1 | 1 | 1 | 1 | 2 | 1 | 1 | 1 |   |   |   |
| 139 | 31 | 5941582 | 216  | 12 | 1 | 1 | 2 | 2 | 1 | 3 | 1 | 4 | 3 | 1 |   |    |   | 6 | 6 | 5 | 6 | 4 | 4 | 6 | 5 | 5 | 4 | 5 | 4 | 5 | 5 | 6 | 4 | 4 | 4 | 2 | 1 | 3 | 2 | 2 | 2 | 6 | 2 | 2 | 2 | 3 | 1 | 2 | 1 | 2 | 2 | 1 | 2 | 2 | 2 | 4 |   |   |
| 14  | 31 | 5941582 | 327  | 12 | 1 | 1 | 2 | 7 | 1 | 4 | 1 | 3 | 3 | 2 |   |    |   | 6 | 5 | 6 | 6 | 6 | 6 | 5 | 3 | 5 | 6 | 5 | 5 | 6 | 6 | 5 | 5 | 5 | 5 | 1 | 1 | 1 | 2 |   | 2 | 7 | 4 | 4 | 5 | 5 | 1 | 1 | 3 | 3 | 3 | 2 | 4 | 3 | 4 | 4 |   |   |
| 141 | 31 | 5941582 | 943  | 12 | 1 | 1 | 2 | 6 | 1 | 4 | 1 | 4 | 1 | 1 |   |    |   | 7 | 6 | 7 | 7 | 7 | 7 | 7 |   | 7 | 6 | 6 |   | 7 | 7 | 7 | 7 | 7 | 7 | 1 | 7 | 1 | 1 | 1 | 1 | 7 | 5 | 5 | 5 | 6 | 7 | 3 | 4 | 5 | 5 | 5 | 7 | 7 | 4 | 3 |   |   |
| 142 | 31 | 5941582 | 765  | 12 | 1 | 1 | 2 | 3 | 5 | 6 | 1 | 5 | 3 | 1 |   |    |   | 6 | 5 | 5 | 7 | 7 | 7 | 7 | 7 | 7 | 1 | 1 | 1 | 6 | 6 | 7 |   | 6 | 7 | 1 | 1 | 1 | 1 | 1 | 2 | 7 | 4 | 5 | 3 | 2 | 1 | 1 | 1 | 1 | 2 | 1 | 6 | 3 | 3 | 5 |   |   |
| 143 | 31 | 5941582 | 716  | 12 | 1 | 1 | 2 | 5 | 5 | 7 | 1 | 6 | 3 | 1 |   |    |   | 7 | 7 | 7 | 7 | 7 | 5 | 6 | 6 | 7 | 7 | 7 | 7 | 7 | 7 | 7 | 7 | 7 | 7 | 1 | 1 | 1 | 2 | 2 | 1 | 7 | 4 | 4 | 3 | 3 | 2 | 1 | 1 | 1 | 1 | 1 | 1 | 1 | 1 | 1 | 1 |   |
| 144 | 31 | 5941582 | 726  | 12 | 1 | 4 | 2 | 4 | 1 | 4 | 6 | 1 | 7 | 1 |   |    |   | 7 | 5 | 5 | 4 | 5 | 5 | 5 | 5 | 5 | 5 | 3 | 3 | 5 | 5 | 5 | 4 | 5 | 5 | 1 | 1 | 1 | 1 | 3 | 2 | 6 | 2 | 2 | 2 | 2 | 2 | 2 | 1 | 1 | 2 | 2 | 6 | 5 | 2 | 2 |   |   |
| 145 | 31 | 5941582 | 57   | 12 | 1 | 1 | 2 | 1 | 5 | 2 | 6 | 8 | 7 | 3 |   |    |   | 7 | 4 | 1 | 7 | 7 | 6 | 5 | 7 |   |   |   |   |   |   |   |   |   |   |   |   |   |   |   |   |   |   |   |   |   |   |   |   |   |   |   |   |   |   |   |   |   |

|     |    |         |      |    |   |   |   |   |   |   |   |   |   |   |   |   |   |   |   |   |   |   |   |   |   |   |   |   |   |   |   |   |   |   |   |   |   |   |   |   |   |   |   |   |   |   |   |   |   |   |   |   |   |   |   |   |   |   |
|-----|----|---------|------|----|---|---|---|---|---|---|---|---|---|---|---|---|---|---|---|---|---|---|---|---|---|---|---|---|---|---|---|---|---|---|---|---|---|---|---|---|---|---|---|---|---|---|---|---|---|---|---|---|---|---|---|---|---|---|
| 147 | 31 | 5941582 | 141  | 12 | 1 | 1 | 2 | 2 | 5 | 3 | 1 | 7 | 1 | 2 |   |   |   | 7 | 6 | 7 | 6 | 6 | 6 | 7 | 7 | 7 | 4 | 4 | 4 | 6 | 7 | 7 | 7 | 4 | 7 | 1 | 1 | 1 | 1 | 1 | 1 | 7 | 1 | 1 | 1 | 2 | 1 | 1 | 1 | 1 | 1 | 1 | 1 | 4 | 1 | 7 |   |   |
| 148 | 31 | 5941582 | 928  | 12 | 1 | 1 | 2 | 5 | 5 | 6 | 1 | 4 | 3 | 1 |   |   |   | 7 | 1 | 7 | 7 | 4 | 6 | 7 | 7 | 7 | 7 |   |   | 7 | 7 | 7 | 7 | 5 | 5 | 1 | 5 | 1 | 1 | 1 | 1 | 7 | 2 | 2 | 4 | 4 | 4 | 3 | 3 | 4 | 4 | 3 | 5 | 3 | 5 | 6 |   |   |
| 149 | 31 | 5941582 | 64   | 12 | 1 | 1 | 2 | 4 | 5 | 4 | 1 | 6 | 3 | 1 |   |   |   | 6 | 3 | 3 | 3 | 5 | 5 | 5 | 5 | 5 | 5 | 6 | 6 | 6 | 5 | 6 | 6 | 4 | 4 | 2 | 2 | 2 | 3 | 3 | 2 | 6 | 5 | 5 | 5 | 5 | 4 | 2 | 3 | 5 | 5 | 3 | 6 | 6 | 2 | 4 |   |   |
| 15  | 31 | 5941582 | 37   | 12 | 1 | 1 | 2 | 4 | 5 | 7 | 1 | 5 | 3 | 1 |   |   |   | 5 | 5 | 5 | 6 | 4 | 3 | 5 | 5 | 5 | 1 | 1 | 1 | 5 | 6 | 5 | 3 | 6 | 6 | 2 | 4 | 2 | 3 | 5 | 3 | 6 | 5 | 5 | 3 | 3 | 2 | 2 | 1 | 1 | 4 | 4 | 2 | 2 | 2 | 1 |   |   |
| 151 | 31 | 5941582 | 67   | 12 | 1 | 1 | 2 | 3 | 1 | 4 | 1 | 7 | 3 | 1 |   |   |   | 7 | 7 | 7 | 7 | 7 | 7 | 7 | 7 | 7 | 3 | 3 | 3 | 7 | 7 | 7 | 7 | 4 | 4 | 1 | 1 | 1 | 1 | 1 | 1 | 7 | 4 | 4 | 4 | 4 | 7 | 4 | 1 | 1 | 1 | 1 | 4 | 5 | 1 | 4 |   |   |
| 152 | 31 | 5941582 | 584  | 12 | 1 | 1 | 2 | 3 | 5 | 6 | 1 | 6 | 5 | 1 |   |   |   | 6 | 6 | 6 | 6 | 6 | 7 | 6 | 6 | 6 | 6 | 6 | 6 | 5 | 5 | 7 | 7 | 6 | 6 | 1 | 1 | 1 | 1 | 2 | 1 | 7 | 2 | 2 | 4 | 4 | 1 | 1 | 2 | 2 | 2 | 3 | 4 | 4 | 2 | 2 |   |   |
| 153 | 31 | 5941582 | 396  | 12 | 1 | 1 | 1 | 3 | 1 | 4 | 1 | 6 | 1 | 1 | 2 | 1 | 6 | 7 | 5 | 6 | 7 | 6 | 6 | 6 | 4 | 5 | 5 | 5 | 6 | 6 | 4 | 4 | 4 | 5 | 5 | 3 | 6 | 5 | 5 | 3 | 3 | 3 | 3 |   |   |   |   |   |   |   |   |   |   |   |   |   |   |   |
| 154 | 31 | 5941582 | 34   | 12 | 1 | 1 | 2 | 1 | 1 | 3 | 1 | 8 | 1 | 1 |   |   |   | 7 | 6 | 2 | 7 | 2 | 2 | 6 | 6 | 7 | 5 | 1 | 1 | 6 | 7 | 7 | 5 | 2 | 7 | 1 | 1 | 1 | 2 | 1 | 2 | 2 | 1 | 1 | 1 | 1 | 1 | 1 | 1 | 1 | 1 | 4 | 5 | 2 | 1 |   |   |   |
| 155 | 31 | 5941582 | 518  | 12 | 1 | 1 | 2 | 4 | 1 | 5 | 1 | 5 | 3 | 1 |   |   |   | 6 | 7 | 6 | 7 | 7 | 7 | 7 | 7 | 7 | 4 | 4 | 4 | 7 | 7 | 7 | 7 | 7 | 7 | 1 | 1 | 1 | 1 | 1 | 2 | 7 | 1 | 1 | 2 | 2 | 1 | 1 | 1 | 1 | 1 | 2 | 4 | 3 | 2 | 1 |   |   |
| 156 | 31 | 5941582 | 596  | 12 | 1 | 1 | 2 | 6 | 1 | 4 | 1 | 5 | 3 | 1 |   |   |   | 2 | 2 | 4 | 7 | 4 | 2 | 4 | 3 | 4 | 1 | 2 | 4 | 6 | 4 | 1 | 1 | 4 | 4 | 1 | 4 | 4 | 4 | 3 | 4 | 4 | 1 | 1 | 3 | 3 | 1 | 5 | 1 | 1 | 1 | 4 | 2 | 2 | 1 | 4 |   |   |
| 157 | 31 | 5941582 | 785  | 12 | 1 | 1 | 1 | 5 | 1 | 6 | 1 | 6 | 5 | 1 | 1 | 7 |   | 2 | 1 | 7 | 1 | 1 | 1 | 1 | 1 | 1 | 1 | 5 | 5 | 1 | 1 | 1 | 1 | 2 | 2 | 7 | 7 | 7 | 7 | 7 | 3 | 2 | 5 | 5 | 7 | 7 | 1 | 7 | 7 | 7 | 7 | 7 | 7 | 2 | 7 | 7 |   |   |
| 158 | 31 | 5941582 | 1333 | 12 | 1 | 1 | 2 | 2 | 5 | 3 | 1 | 7 | 1 | 1 |   |   |   | 6 | 7 | 7 | 7 | 7 | 7 | 6 | 5 | 6 | 6 | 7 | 4 | 7 | 7 | 7 | 6 | 7 | 7 |   | 2 | 4 | 1 | 2 | 1 | 7 | 4 | 4 | 5 | 4 | 5 | 7 | 7 | 7 | 7 | 3 | 6 | 2 | 3 | 6 |   |   |
| 159 | 32 | 5941582 | -1   | 12 | 1 | 1 | 2 | 5 | 5 | 6 | 1 | 5 | 1 | 1 |   |   |   | 6 | 6 | 5 | 5 | 7 | 6 | 5 | 5 | 5 | 7 | 7 | 7 | 6 | 6 | 7 | 7 | 7 | 7 | 1 | 1 | 1 | 1 | 2 | 1 | 7 | 2 | 2 | 1 | 1 | 1 | 1 | 1 | 1 | 1 | 1 | 6 | 3 | 1 | 7 |   |   |
| 16  | 31 | 5941582 | 41   | 12 | 1 | 1 | 2 | 2 | 1 | 3 | 1 | 5 | 3 | 1 |   |   |   | 7 | 5 | 3 | 7 | 6 | 7 | 7 | 5 | 6 | 4 | 6 | 5 | 6 | 6 | 7 | 7 | 4 | 4 | 2 | 2 | 1 | 2 | 2 | 2 | 7 | 6 | 3 | 1 | 2 | 5 | 1 | 1 | 1 | 2 | 5 | 7 | 6 | 2 | 6 |   |   |
| 161 | 31 | 5941582 | 125  | 12 | 1 | 1 | 1 | 2 | 5 | 3 | 1 | 1 | 3 | 2 | 1 | 2 |   | 7 | 7 | 7 | 7 | 6 | 5 | 4 | 3 | 3 | 6 | 6 | 6 | 7 | 7 | 7 | 5 | 7 | 6 | 1 | 1 | 1 | 1 | 1 | 1 | 7 | 3 | 4 | 1 | 2 | 1 | 1 | 1 | 1 | 1 | 1 | 1 | 1 | 1 |   |   |   |
| 162 | 31 | 5941582 | 54   | 12 | 1 | 1 | 2 | 6 | 5 | 3 | 2 | 2 | 3 | 1 |   |   |   | 4 | 4 | 4 | 4 | 6 | 4 | 4 | 4 | 4 | 4 | 4 | 4 | 6 | 5 | 6 | 4 | 3 | 2 | 4 | 4 | 7 | 4 | 4 | 4 | 4 | 4 | 4 | 5 | 6 | 4 | 3 | 2 | 3 | 4 | 3 | 4 | 5 | 4 | 4 |   |   |
| 163 | 31 | 5941582 | 6    | 12 | 1 | 1 | 2 | 2 | 5 | 3 | 1 | 7 | 3 | 1 |   |   |   | 7 | 3 | 5 | 6 | 3 | 6 | 3 | 2 | 2 | 6 | 5 | 4 | 7 | 7 | 7 | 4 | 7 | 7 | 1 | 2 | 2 | 1 | 5 | 2 | 7 | 3 | 3 | 1 | 1 | 1 | 1 | 1 | 1 | 1 | 2 | 1 | 3 | 1 | 1 |   |   |
| 164 | 31 | 5941582 | 279  | 12 | 1 | 1 | 2 | 2 | 5 | 3 | 1 | 6 | 1 | 1 |   |   |   | 7 | 7 | 7 | 7 | 6 | 7 | 7 | 6 | 5 | 4 | 4 | 6 | 7 | 7 | 7 | 7 | 1 | 7 | 1 | 1 | 1 | 1 | 1 | 7 | 4 | 4 | 2 | 2 | 4 | 4 | 1 | 1 | 2 | 1 | 6 | 5 | 4 | 4 |   |   |   |
| 165 | 31 | 5941582 | 543  | 12 | 1 | 1 | 2 | 2 | 1 | 3 | 1 | 6 | 3 | 1 |   |   |   | 7 | 5 | 4 | 3 | 2 | 2 | 6 | 6 | 6 | 5 | 5 | 6 | 5 | 5 | 5 | 5 | 7 | 7 | 1 | 1 | 1 | 1 | 3 | 1 | 7 | 5 | 5 | 1 | 1 | 1 | 3 | 1 | 1 | 1 | 1 | 4 | 3 | 1 | 1 |   |   |
| 166 | 31 | 5941582 | 588  | 12 | 1 | 1 | 1 | 3 | 5 | 4 | 1 | 6 | 3 | 1 | 1 | 1 | 5 | 6 | 7 | 7 | 7 | 7 | 5 | 7 | 7 | 7 | 7 | 7 | 7 | 7 | 7 | 7 | 5 | 7 | 7 | 1 | 1 | 1 | 2 | 1 | 1 | 7 | 6 | 2 | 1 | 1 | 1 | 1 | 2 | 2 | 2 | 2 | 7 | 1 | 1 | 7 |   |   |
| 167 | 31 | 5941582 | 636  | 12 | 1 | 6 | 2 | 3 | 5 | 3 | 2 | 7 | 1 | 2 |   |   |   | 7 | 7 | 7 | 7 | 7 | 7 | 7 | 7 | 7 | 7 | 5 | 7 | 7 | 7 | 7 | 7 | 7 | 1 | 1 | 1 | 1 | 1 | 5 | 7 | 3 | 2 | 1 | 1 | 1 | 1 | 1 | 1 | 1 | 1 | 7 | 7 | 4 | 5 |   |   |   |
| 168 | 31 | 5941582 | 178  | 12 | 1 | 1 | 2 | 6 | 5 | 6 | 1 | 4 | 3 | 1 |   |   |   | 4 | 2 | 2 | 6 | 3 | 5 | 6 | 6 | 6 | 6 | 4 | 5 | 6 | 5 | 6 | 6 | 6 | 6 | 2 | 2 | 2 |   |   | 6 | 6 | 5 | 5 | 4 | 3 | 3 | 3 | 2 | 2 | 2 | 2 | 5 | 6 | 3 | 3 |   |   |
| 169 | 32 | 5941582 | -1   | 12 | 1 | 1 | 2 | 7 | 5 | 4 | 1 | 3 | 1 | 1 |   |   |   | 7 | 7 | 7 | 7 | 7 | 7 | 7 | 7 | 7 | 7 | 7 | 7 | 7 | 7 | 7 | 7 | 7 | 7 | 7 | 7 | 7 | 7 | 7 | 1 | 1 | 1 | 1 | 4 | 4 | 6 | 6 | 1 | 1 | 1 | 4 | 1 | 1 | 7 | 4 | 1 | 7 |
| 17  | 31 | 5941582 | 859  | 12 | 1 | 1 | 2 | 4 | 5 | 5 | 1 | 5 | 1 | 1 |   |   |   | 7 | 7 | 7 | 7 | 7 | 7 | 7 | 6 | 6 | 7 | 7 | 7 | 7 | 7 | 7 | 7 | 7 | 4 | 5 | 1 | 1 | 2 | 1 | 1 | 1 | 7 | 3 | 3 | 4 | 5 | 3 | 3 | 5 | 7 | 6 | 6 | 7 | 7 | 5 | 7 |   |
| 171 | 31 | 5941582 | 1354 | 12 | 1 | 1 | 2 | 5 | 1 | 6 | 1 | 6 | 5 | 1 |   |   |   | 2 | 2 | 1 | 6 | 5 | 6 | 3 | 3 | 3 | 1 | 1 | 1 | 1 | 1 | 2 | 1 | 6 | 6 | 6 | 4 | 4 | 2 | 6 | 7 | 5 | 4 | 4 | 2 | 2 | 2 | 2 | 2 | 2 | 3 | 2 | 4 | 4 | 2 | 2 |   |   |
| 172 | 31 | 5941582 | 392  | 12 | 1 | 1 | 2 | 3 | 1 | 6 | 1 | 6 | 3 | 1 |   |   |   | 2 | 6 | 7 | 5 | 4 | 5 | 7 | 7 | 7 | 7 | 1 | 4 | 3 | 2 | 2 | 7 | 7 | 1 | 1 | 1 | 1 | 1 | 1 | 7 | 5 | 6 | 3 | 2 | 2 | 1 | 1 | 1 | 1 | 5 | 5 | 1 | 1 |   |   |   |   |
| 173 | 31 | 5941582 | 58   | 12 | 1 | 1 | 2 | 5 | 1 | 3 | 1 | 7 | 1 | 1 |   |   |   | 6 | 7 | 6 | 7 | 7 | 7 | 6 | 6 | 6 | 6 | 6 | 6 | 6 | 6 | 7 | 7 | 6 | 6 | 1 | 1 | 1 | 2 | 2 | 2 | 7 | 2 | 2 | 2 | 2 | 2 | 2 | 1 | 1 | 2 | 2 | 7 | 7 | 2 | 2 |   |   |
| 174 | 32 | 5941582 | -1   | 12 | 1 | 1 | 2 | 8 | 1 | 2 | 2 | 1 | 3 | 1 |   |   |   | 7 | 6 | 5 | 6 | 7 | 7 | 5 | 6 | 6 | 4 | 7 | 4 | 7 | 7 | 7 | 7 | 6 | 6 | 2 | 1 | 1 | 2 | 1 | 1 | 7 | 4 | 4 | 5 | 5 | 2 | 4 | 3 | 2 | 4 | 2 | 5 | 5 | 3 | 5 |   |   |
| 175 | 31 | 5941582 | 342  | 12 | 1 | 1 | 2 | 5 | 1 | 5 | 1 | 7 | 6 | 1 |   |   |   | 2 | 2 | 2 | 2 | 2 | 3 | 3 | 3 | 3 | 2 | 3 | 2 | 3 | 3 | 3 | 2 | 5 | 6 | 4 | 3 | 4 | 6 | 7 | 5 | 4 | 5 | 5 | 2 | 2 | 3 | 3 | 2 | 4 | 2 | 3 | 4 | 4 | 3 | 3 |   |   |
| 176 | 31 | 5941582 | 546  | 12 | 1 | 1 | 2 | 5 | 1 | 3 | 1 | 5 | 1 | 1 |   |   |   | 7 | 7 | 7 | 7 | 7 | 7 | 5 | 5 | 5 | 6 | 7 | 7 | 7 | 7 | 7 | 7 | 7 | 7 | 1 | 1 | 1 | 1 | 2 | 1 | 7 | 1 | 1 | 1 | 1 | 1 | 1 | 1 | 1 | 1 | 1 | 1 | 1 | 1 | 1 |   |   |

|     |    |         |      |    |   |   |   |   |   |   |   |   |   |   |   |    |    |   |   |   |   |   |   |   |   |   |   |   |   |   |   |   |   |   |   |   |   |   |   |   |   |   |   |   |   |   |   |   |   |   |   |   |   |   |   |   |   |   |
|-----|----|---------|------|----|---|---|---|---|---|---|---|---|---|---|---|----|----|---|---|---|---|---|---|---|---|---|---|---|---|---|---|---|---|---|---|---|---|---|---|---|---|---|---|---|---|---|---|---|---|---|---|---|---|---|---|---|---|---|
| 177 | 31 | 5941582 | 253  |    |   | 1 | 2 |   | 1 | 6 | 1 | 6 | 3 |   |   |    |    | 5 | 3 | 3 | 6 | 6 | 6 | 7 | 7 | 7 | 4 | 4 | 4 | 6 | 7 | 7 | 5 | 7 | 7 | 1 | 7 | 1 | 1 | 1 | 1 | 7 | 4 | 4 | 1 | 1 | 1 | 1 | 1 | 1 | 1 | 1 | 1 | 4 | 2 |   | 1 |   |
| 178 | 31 | 5941582 | 1483 |    |   | 1 | 1 |   | 5 | 2 | 2 | 5 | 2 |   | 1 | 5  | 4  | 1 | 1 | 1 | 1 | 1 |   |   |   | 1 | 1 | 1 | 1 | 1 | 1 | 1 | 1 | 1 | 7 | 1 | 1 | 1 | 1 | 7 | 7 | 7 | 7 | 1 | 1 | 7 | 7 | 1 | 1 | 1 | 1 | 2 | 4 | 6 | 3 | 3 |   |   |
| 179 | 31 | 5941582 | 1515 |    |   | 1 | 1 |   | 5 | 1 | 1 | 1 | 1 |   | 1 | 8  | 8  | 1 | 1 | 1 | 1 | 1 | 1 | 1 | 1 | 1 | 1 | 1 | 1 | 1 | 1 | 1 | 1 | 1 | 1 | 1 | 7 | 7 | 7 | 7 | 7 | 1 | 1 | 7 | 7 | 1 | 1 | 1 | 1 | 1 | 1 | 1 | 1 | 1 | 1 | 1 |   |   |
| 18  | 31 | 5941582 | 695  |    |   | 1 | 2 |   | 2 | 2 | 1 | 1 | 3 |   |   |    |    | 7 | 7 | 7 | 7 | 7 | 7 | 7 | 7 | 7 | 7 | 7 | 7 |   | 1 | 1 | 1 | 1 | 1 | 1 | 1 | 1 | 7 | 7 | 7 | 7 | 7 | 1 | 1 | 7 | 7 | 1 | 1 | 1 | 1 |   |   | 1 | 1 | 1 | 1 |   |
| 181 | 31 | 5941582 | 1458 |    |   | 3 | 1 |   | 1 | 6 | 1 | 6 | 4 |   | 1 | 16 | 5  | 4 | 4 | 4 | 4 | 4 | 4 | 4 | 4 | 4 | 4 | 4 | 4 | 4 | 4 | 4 | 4 | 4 | 4 | 4 | 4 | 4 | 4 | 4 | 4 | 4 | 4 | 4 | 4 | 4 | 4 | 4 | 4 | 4 | 4 | 4 | 4 | 4 | 4 | 4 |   |   |
| 182 | 31 | 5941582 | 54   |    |   | 1 | 1 |   | 1 | 6 | 1 | 6 | 1 |   | 1 | 3  | 6  | 4 | 4 | 4 | 4 | 4 | 4 | 4 | 4 | 4 | 4 | 4 | 4 | 4 | 4 | 4 | 4 | 4 | 4 | 4 | 4 | 4 | 4 | 4 | 4 | 4 | 4 | 4 | 4 | 4 | 4 | 4 | 4 | 4 | 4 | 4 | 4 | 4 | 4 | 4 |   |   |
| 183 | 31 | 5941582 | 214  |    |   | 1 | 1 |   | 5 | 3 | 2 | 4 | 1 |   | 1 | 78 | 12 | 6 | 5 | 3 | 5 | 4 | 4 | 4 | 4 | 4 | 6 | 4 | 5 | 5 | 5 | 5 | 5 | 5 | 5 | 5 | 5 | 5 | 5 | 3 | 3 | 3 | 3 | 5 | 5 | 2 | 2 | 4 | 4 | 4 | 4 | 4 | 4 | 4 | 5 | 5 | 5 | 5 |
| 184 | 31 | 5941582 | 246  | 12 | 1 | 1 | 2 | 5 | 5 | 6 | 1 | 4 | 3 | 1 |   |    |    | 7 | 7 | 7 | 7 | 7 | 7 | 5 | 4 | 4 | 4 | 5 | 5 | 7 | 7 | 7 | 7 | 7 | 7 | 1 | 1 | 1 | 1 | 1 | 1 | 7 | 1 | 1 | 1 | 1 | 1 | 1 | 1 | 1 | 1 | 1 | 5 | 2 | 1 | 1 |   |   |
| 185 | 31 | 5941582 | 358  | 12 | 1 | 1 | 2 | 2 | 1 | 5 | 1 | 6 | 6 | 1 |   |    |    | 7 | 5 | 4 | 7 | 7 | 4 | 5 | 5 | 5 | 5 | 7 | 3 | 3 | 3 | 7 | 5 | 4 | 7 | 2 | 1 | 1 | 1 | 3 | 5 | 7 | 1 | 1 | 1 | 1 | 1 | 1 | 1 | 1 | 2 | 1 | 4 | 3 | 2 | 4 |   |   |
| 186 | 31 | 5941582 | 458  | 12 | 1 | 1 | 2 | 5 | 5 | 6 | 1 | 6 | 1 | 1 |   |    |    | 7 | 6 | 6 | 7 | 7 | 7 | 7 | 7 | 7 | 7 | 4 | 4 | 7 | 7 | 7 | 7 | 7 | 7 | 1 | 1 | 1 | 1 | 1 | 1 | 7 | 1 | 1 | 1 | 1 | 1 | 1 | 1 | 1 | 1 | 1 | 1 | 1 | 1 | 1 | 1 |   |
| 187 | 31 | 5941582 | 623  | 12 | 3 | 1 | 2 | 5 | 5 | 3 | 1 | 5 | 1 | 1 |   |    |    | 5 | 5 | 4 | 4 | 4 | 4 | 4 | 4 | 4 | 3 | 4 | 4 | 4 | 4 | 4 | 3 | 3 | 2 | 2 | 2 | 3 | 3 | 4 | 5 | 4 | 3 | 4 | 5 | 4 | 3 | 2 | 2 | 4 | 4 | 6 | 5 | 2 | 3 |   |   |   |
| 188 | 31 | 5941582 | 351  | 12 | 1 | 1 | 2 | 3 | 5 | 3 | 1 | 4 | 3 | 1 |   |    |    | 7 | 5 | 6 | 7 | 4 | 4 |   | 5 | 5 | 4 | 4 | 4 | 7 | 7 | 4 | 5 | 4 | 7 | 1 | 1 | 1 | 1 | 1 | 1 | 7 | 4 | 4 | 1 | 1 | 1 | 1 | 1 | 1 | 1 | 1 | 4 | 4 | 1 | 1 |   |   |
| 189 | 31 | 5941582 | 752  | 12 | 1 | 1 | 2 | 5 | 5 | 6 | 1 | 5 | 3 | 1 |   |    |    | 7 | 7 | 7 | 7 | 7 | 7 | 5 | 5 | 5 | 6 | 5 | 6 | 7 | 5 | 5 | 5 | 5 | 3 | 1 | 1 | 1 | 1 | 1 | 1 | 7 | 4 | 4 | 5 | 6 | 2 | 3 | 2 | 2 | 3 | 3 | 6 | 5 | 3 | 5 |   |   |
| 19  | 31 | 5941582 | 37   | 12 | 1 | 1 | 2 | 3 | 5 | 6 | 1 | 6 | 6 | 1 |   |    |    | 6 | 5 | 5 | 4 | 6 | 5 | 2 | 2 | 2 | 5 | 6 | 6 | 6 | 6 | 6 | 6 | 4 | 4 | 2 | 5 | 2 | 1 | 4 | 2 | 6 | 3 | 3 | 3 | 3 | 2 | 2 | 2 | 2 | 2 | 2 | 3 | 3 | 2 | 5 |   |   |
| 191 | 31 | 5941582 | 47   | 12 | 1 | 1 | 1 | 4 | 5 | 4 | 1 | 6 | 1 | 1 | 3 | 26 | 7  | 7 | 7 | 7 | 7 | 7 | 7 | 6 | 6 | 6 | 7 | 7 | 6 | 7 | 7 | 7 | 7 | 3 | 7 | 1 | 1 | 1 | 1 | 1 | 1 | 7 | 1 | 1 | 1 | 3 | 1 | 1 | 1 | 1 | 1 | 1 | 3 | 2 | 2 | 4 |   |   |
| 192 | 31 | 5941582 | 412  | 12 | 1 | 1 | 2 | 7 | 5 | 6 | 1 | 2 | 3 | 1 |   |    |    | 7 | 7 | 7 | 7 | 7 | 7 | 5 | 6 | 6 | 4 | 6 | 4 | 7 | 7 | 7 | 7 | 3 | 6 | 1 | 1 | 1 | 1 | 1 | 2 | 6 | 2 | 2 | 1 | 1 | 1 | 1 | 1 | 1 | 1 | 4 | 3 | 1 | 4 |   |   |   |
| 193 | 31 | 5941582 | 366  | 12 | 1 | 1 | 2 | 2 | 1 | 5 | 1 | 6 | 3 | 1 |   |    |    | 5 | 4 | 4 | 6 | 6 | 4 | 6 | 6 | 7 | 4 | 4 | 3 | 7 | 7 | 7 | 7 | 5 | 6 | 1 | 1 | 1 | 1 | 2 | 1 | 7 | 1 | 1 | 2 | 2 | 1 | 1 | 1 | 1 | 1 | 4 | 2 | 3 | 4 |   |   |   |
| 194 | 31 | 5941582 | 329  | 12 | 1 | 1 | 2 | 8 | 1 | 4 | 2 | 1 | 1 | 1 |   |    |    | 7 |   |   |   |   |   |   |   |   |   |   | 7 | 7 | 7 | 7 | 7 | 7 | 7 | 1 | 1 | 1 | 1 | 1 | 1 | 7 | 4 | 4 | 7 | 7 | 1 | 1 |   |   |   |   |   |   | 1 | 7 |   |   |
| 195 | 31 | 5941582 | 474  | 12 | 1 | 1 | 2 | 3 | 2 | 5 | 1 | 5 | 1 | 2 |   |    |    | 2 | 2 | 3 | 5 | 2 | 1 | 1 | 1 | 1 | 2 | 6 | 2 | 5 | 2 | 1 | 1 | 2 | 1 | 7 | 7 | 4 | 3 | 6 | 6 | 2 | 4 | 4 | 2 | 3 | 7 | 7 | 3 | 2 | 5 | 7 | 7 | 4 | 3 | 5 |   |   |
| 196 | 31 | 5941582 | 246  | 12 | 1 | 1 | 2 | 6 | 5 | 6 | 1 | 7 | 1 | 2 |   |    |    | 1 | 1 | 1 | 1 | 1 | 1 | 2 | 2 | 1 | 1 | 1 | 2 | 1 | 1 | 5 | 1 | 1 | 1 | 1 | 1 | 1 | 2 | 7 | 7 | 7 | 7 | 4 | 4 | 1 | 1 | 1 | 1 | 1 | 1 | 1 | 1 | 1 | 1 | 1 |   |   |
| 197 | 31 | 5941582 | 354  | 12 | 1 | 1 | 2 | 5 | 5 | 6 | 1 | 4 | 3 | 1 |   |    |    | 3 | 2 | 2 | 5 | 5 | 6 | 1 | 2 | 2 | 6 | 6 | 5 | 4 | 4 | 5 | 5 | 2 | 2 | 5 | 5 | 5 | 3 | 7 | 2 | 5 | 4 | 4 | 6 | 5 | 2 | 2 | 2 | 2 | 4 | 4 | 6 | 6 | 1 | 3 |   |   |
| 198 | 31 | 5941582 | 378  | 12 | 3 | 1 | 2 | 3 | 1 | 4 | 6 | 7 | 3 | 1 |   |    |    | 7 | 7 | 7 | 7 | 7 | 7 | 7 | 7 | 7 | 7 | 7 | 7 | 7 | 7 | 7 | 7 | 7 | 1 | 1 | 1 | 1 | 1 | 1 | 7 | 4 | 4 | 1 | 1 | 1 | 1 | 1 | 1 | 1 | 1 | 1 | 4 | 1 | 5 |   |   |   |
| 199 | 31 | 5941582 | 492  | 12 | 4 | 1 | 2 | 6 | 5 | 6 | 1 | 3 | 2 | 1 |   |    |    | 5 | 3 | 3 | 5 | 4 | 3 | 3 | 3 | 3 | 5 | 5 | 5 | 4 | 4 | 5 | 5 | 4 | 4 | 2 | 2 | 2 | 2 | 3 | 2 | 6 | 2 | 2 | 3 | 3 | 2 | 2 | 2 | 2 | 2 | 2 | 6 | 5 | 2 | 2 |   |   |
| 2   | 31 | 5941582 | 252  | 12 | 1 | 1 | 2 | 4 | 1 | 3 | 1 | 5 | 1 | 1 |   |    |    | 7 | 6 | 6 | 7 | 7 | 4 | 2 | 3 | 2 | 3 | 3 | 3 | 7 | 7 | 7 | 7 | 7 | 7 | 1 | 1 | 1 | 1 | 1 | 1 | 7 | 3 | 3 | 1 | 1 | 1 | 1 | 1 | 1 | 1 | 1 | 6 | 6 | 1 | 7 |   |   |
| 21  | 31 | 5941582 | 41   | 12 | 1 | 1 | 2 | 4 | 5 | 4 | 1 | 5 | 3 | 1 |   |    |    | 6 | 2 | 2 | 4 | 4 | 4 | 2 | 2 | 2 | 5 | 3 | 4 | 2 | 2 | 5 | 4 | 6 | 6 | 4 | 2 | 2 | 2 | 4 | 6 | 6 | 4 | 4 | 1 | 1 | 1 | 1 | 1 | 1 | 1 | 1 | 4 | 4 | 2 | 2 |   |   |
| 22  | 31 | 5941582 | 381  | 12 | 1 | 1 | 2 | 5 | 5 | 6 | 1 | 4 | 3 | 1 |   |    |    | 7 | 5 | 6 | 6 | 6 | 6 | 6 | 6 | 6 | 7 | 6 | 6 | 6 | 6 | 6 | 6 | 6 | 1 | 2 | 1 | 2 | 2 | 2 | 7 | 2 | 2 | 3 | 3 | 5 | 3 | 2 | 1 | 3 | 2 | 5 | 4 | 3 | 5 |   |   |   |
| 23  | 31 | 5941582 | 321  | 11 | 3 | 1 | 2 | 3 | 5 | 6 | 1 | 6 | 3 | 1 |   |    |    | 2 | 2 | 2 | 1 | 4 | 4 | 3 | 2 | 1 | 3 | 2 | 4 | 3 | 1 | 1 | 2 | 2 | 2 | 6 | 2 | 2 | 2 | 2 | 2 | 2 | 3 | 3 | 1 | 1 | 2 | 2 | 2 | 1 | 1 | 2 | 3 | 2 | 1 | 2 |   |   |
| 24  | 31 | 5941582 | 476  | 12 | 1 | 1 | 2 |   | 5 | 5 | 1 | 6 | 5 | 1 |   |    |    | 7 | 5 | 4 | 6 | 7 | 5 | 4 | 4 | 4 | 5 | 5 | 4 | 5 | 5 | 6 | 5 | 3 | 6 | 3 | 3 | 3 | 1 | 2 | 2 | 5 | 4 | 4 | 2 | 2 | 2 | 2 | 2 | 2 | 2 | 4 | 4 | 3 | 5 |   |   |   |
| 25  | 31 | 5941582 | 48   | 12 | 1 | 1 | 1 | 4 | 5 | 4 | 1 | 6 | 1 | 1 | 1 | 2  | 3  | 6 | 4 | 5 | 7 | 7 | 4 | 2 | 2 | 2 | 4 | 5 | 4 | 6 | 5 | 7 | 7 | 7 | 7 | 5 | 5 | 5 |   |   |   |   |   |   |   |   |   |   |   |   |   |   |   |   |   |   |   |   |

|     |    |         |      |    |   |   |   |   |   |   |   |   |   |   |   |    |   |   |   |   |   |   |   |   |   |   |   |   |   |   |   |   |   |   |   |   |   |   |   |   |   |   |   |   |   |   |   |   |   |   |   |   |   |   |   |   |   |   |
|-----|----|---------|------|----|---|---|---|---|---|---|---|---|---|---|---|----|---|---|---|---|---|---|---|---|---|---|---|---|---|---|---|---|---|---|---|---|---|---|---|---|---|---|---|---|---|---|---|---|---|---|---|---|---|---|---|---|---|---|
| 27  | 31 | 5941582 | 393  | 12 | 1 | 1 | 2 | 4 | 5 | 3 | 1 | 5 | 5 | 1 |   |    |   | 7 | 6 | 7 | 7 | 6 | 5 | 6 | 6 | 6 | 7 | 7 | 7 | 7 | 7 | 7 | 7 | 7 | 7 | 1 | 2 | 1 | 1 | 1 | 1 | 7 | 2 | 2 | 1 | 1 | 1 | 1 | 1 | 1 | 1 | 1 | 6 | 6 | 2 | 4 |   |   |
| 28  | 31 | 5941582 | 412  | 12 | 1 | 1 | 2 | 4 | 5 | 4 | 1 | 6 | 3 | 1 |   |    |   | 7 | 7 | 7 | 7 | 7 | 6 | 4 | 6 | 6 | 5 | 7 | 6 | 7 | 7 | 7 | 7 | 5 | 7 | 1 | 1 | 1 | 1 | 1 | 7 | 2 | 3 | 1 | 1 | 1 | 1 | 1 | 1 | 1 | 7 | 4 | 2 | 7 |   |   |   |   |
| 29  | 31 | 5941582 | 646  | 12 | 1 | 1 | 2 | 6 | 5 | 3 | 2 | 6 | 1 | 1 |   |    |   | 6 | 5 |   | 7 | 7 |   | 5 | 5 | 5 |   | 6 | 7 | 5 | 6 | 7 | 6 | 7 | 7 | 6 | 1 | 1 | 3 | 3 | 2 | 7 | 2 | 2 | 2 | 2 | 2 | 2 | 1 | 1 | 2 | 2 | 3 | 3 | 1 | 4 |   |   |
| 21  | 31 | 5941582 | 499  | 12 | 1 | 1 | 2 | 5 | 1 | 6 | 1 | 4 | 3 | 1 |   |    |   | 6 | 5 | 6 | 7 | 7 | 7 | 6 | 6 | 6 | 7 | 7 | 7 | 6 | 6 | 6 | 5 | 7 | 7 | 1 | 1 | 1 | 3 | 2 | 2 | 2 | 4 | 4 | 5 | 4 | 5 | 2 | 2 | 2 | 2 | 2 | 2 | 2 | 1 |   |   |   |
| 211 | 31 | 5941582 | 573  | 12 | 1 | 1 | 2 | 6 | 5 | 3 | 1 | 6 | 1 | 1 |   |    |   | 6 | 6 | 6 | 7 | 6 | 6 | 6 | 6 | 6 | 6 | 5 | 6 | 6 | 6 | 6 | 5 | 5 | 6 | 2 | 1 | 1 | 1 | 2 | 2 | 7 | 5 | 2 | 2 | 2 | 3 | 3 | 1 | 4 | 3 | 3 | 6 | 5 | 3 | 4 |   |   |
| 212 | 31 | 5941582 | 896  | 12 | 1 | 1 | 2 | 3 | 1 | 4 | 1 | 6 | 1 | 1 |   |    |   | 7 | 5 | 5 | 7 | 7 | 7 | 5 | 5 | 5 | 6 | 6 | 6 | 6 | 6 | 6 | 6 | 6 | 6 | 2 | 1 | 1 | 2 | 3 | 2 | 7 | 2 | 2 | 2 | 2 | 1 | 1 | 1 | 1 | 1 | 1 | 4 | 4 | 2 | 3 |   |   |
| 213 | 31 | 5941582 | 777  | 12 | 1 | 1 | 2 | 6 | 1 | 6 | 1 | 4 | 3 | 2 |   |    |   | 6 | 4 | 6 | 7 | 5 | 7 | 6 | 7 | 6 | 6 | 7 | 6 | 7 | 6 | 7 | 7 | 6 | 7 | 2 | 1 | 1 | 2 | 1 | 2 | 7 | 3 | 3 | 2 | 1 | 2 | 3 | 1 | 2 | 3 | 2 | 4 | 1 | 2 | 4 |   |   |
| 214 | 31 | 5941582 | 781  | 12 | 1 | 1 | 2 | 6 | 5 | 4 | 1 | 6 | 3 | 1 |   |    |   | 7 | 6 | 6 | 6 | 7 | 5 | 7 | 6 | 6 | 6 | 6 | 6 | 6 | 6 | 6 | 7 | 7 | 5 | 6 | 2 | 2 | 2 | 1 | 1 | 1 | 7 | 2 | 2 | 6 | 7 | 6 | 4 | 5 | 4 | 7 | 4 | 7 | 7 | 1 | 6 |   |
| 215 | 31 | 5941582 | 623  | 12 | 1 | 1 | 2 | 4 | 5 | 3 | 1 | 6 | 3 | 1 |   |    |   | 7 | 4 | 4 | 7 | 7 | 7 | 6 | 6 | 6 | 4 | 6 | 5 | 7 | 7 | 7 | 7 | 7 | 7 | 1 | 1 | 1 | 1 | 2 | 1 | 7 | 6 | 6 | 3 | 3 | 2 | 1 | 1 | 2 | 2 | 2 | 3 | 3 | 2 | 6 |   |   |
| 216 | 31 | 5941582 | 523  | 12 | 1 | 1 | 2 | 7 | 1 | 6 | 2 | 2 | 3 | 1 |   |    |   | 3 | 1 | 1 | 1 | 1 | 1 | 1 | 3 | 1 | 1 | 1 | 1 | 1 | 1 | 1 | 1 | 1 | 4 | 1 | 7 | 3 | 7 | 4 | 7 | 5 | 4 | 3 | 4 | 7 | 5 | 7 | 6 | 7 | 5 | 7 | 6 | 7 | 7 | 4 | 3 |   |
| 217 | 31 | 5941582 | 823  | 12 | 1 | 1 | 2 | 3 | 5 | 6 | 1 | 7 | 5 | 1 |   |    |   | 3 | 4 | 3 | 7 | 6 | 6 | 5 | 5 | 5 | 6 | 6 | 6 | 4 | 4 | 5 | 5 | 6 | 7 | 4 | 3 | 1 | 2 | 5 | 6 | 6 | 4 | 4 | 2 | 3 | 2 | 2 | 2 | 2 | 2 | 2 | 4 | 3 | 3 | 1 |   |   |
| 218 | 31 | 5941582 | 422  | 12 | 1 | 1 | 2 | 5 | 5 | 4 | 1 | 5 | 1 | 1 |   |    |   | 7 | 5 | 6 | 7 | 7 | 6 | 5 | 6 | 6 | 6 | 6 | 5 | 5 | 6 | 7 | 6 | 1 | 6 | 1 | 4 | 4 | 1 | 3 | 2 | 5 | 1 | 1 | 5 | 5 | 3 | 3 | 1 | 1 | 3 | 3 | 5 | 6 | 1 | 5 |   |   |
| 219 | 31 | 5941582 | 5    | 12 | 1 | 1 | 1 | 6 | 5 | 7 | 1 | 3 | 3 | 1 | 4 | 4  | 8 | 7 | 7 | 7 | 7 | 7 | 7 | 7 | 7 | 7 | 7 | 7 | 7 | 7 | 7 | 7 | 7 | 7 | 7 | 7 | 1 | 1 | 1 | 1 | 1 | 1 | 7 | 1 | 1 | 3 | 3 | 1 | 1 | 1 | 1 | 1 | 1 | 7 | 7 | 1 | 4 |   |
| 22  | 31 | 5941582 | 614  | 12 | 1 | 1 | 2 | 6 | 5 | 3 | 1 | 6 | 3 | 1 |   |    |   | 5 | 2 | 5 | 7 | 2 | 4 | 4 | 5 | 5 | 6 | 5 | 5 | 4 | 4 | 5 | 3 | 6 | 6 | 2 | 1 | 1 | 1 | 1 | 1 | 7 | 5 | 5 | 2 | 3 | 2 | 1 | 1 | 1 | 2 | 1 | 2 | 1 | 4 | 4 |   |   |
| 221 | 31 | 5941582 | 659  | 12 | 1 | 1 | 2 | 6 | 1 | 6 | 1 | 3 | 3 | 1 |   |    |   | 7 | 7 | 7 | 5 | 7 | 6 | 6 | 6 | 6 | 4 | 4 | 4 | 4 | 4 | 4 | 4 | 4 | 2 | 2 | 3 | 5 | 4 | 2 | 2 | 2 | 2 | 2 | 2 | 4 | 4 | 2 | 2 | 1 | 1 | 1 | 1 | 1 | 1 | 1 | 3 |   |
| 222 | 31 | 5941582 | 68   | 12 | 1 | 1 | 2 | 5 | 1 | 4 | 1 | 7 | 3 | 1 |   |    |   | 7 | 7 | 7 | 4 | 5 | 2 | 6 | 6 | 7 | 4 | 4 | 4 | 7 | 7 | 7 | 6 | 1 | 7 | 1 | 2 | 2 | 1 | 1 | 7 | 7 | 1 | 1 | 7 | 7 | 6 | 4 | 1 | 2 | 2 | 2 | 7 | 7 | 4 | 6 |   |   |
| 223 | 31 | 5941582 | 1164 | 12 | 1 | 1 | 2 | 6 | 5 | 4 | 1 | 6 | 1 | 1 |   |    |   | 7 | 7 | 1 | 7 | 7 | 7 | 1 | 1 | 1 | 1 | 4 | 6 | 1 | 1 | 7 | 4 | 4 | 4 | 1 | 1 | 1 | 1 | 7 | 7 | 4 | 4 | 4 | 1 | 1 | 1 | 1 | 1 | 1 | 1 | 1 | 1 | 1 | 1 | 1 |   |   |
| 224 | 31 | 5941582 | 495  | 12 | 1 | 1 | 2 | 4 | 5 | 6 | 1 | 4 | 3 | 1 |   |    |   | 7 | 7 | 7 | 7 | 7 | 7 | 7 | 7 | 7 | 7 | 7 | 7 | 7 | 7 | 7 | 7 | 1 | 7 | 1 | 1 | 1 | 1 | 1 | 7 | 1 | 1 | 5 | 5 | 1 | 1 | 1 | 1 | 2 | 2 | 7 | 7 | 1 | 4 |   |   |   |
| 225 | 31 | 5941582 | 542  | 12 | 1 | 1 | 2 | 5 | 1 | 5 | 1 | 6 | 1 | 1 |   |    |   | 1 | 1 | 1 | 4 | 1 | 1 | 1 | 1 | 1 | 4 | 4 | 3 | 1 | 1 | 5 | 5 | 1 | 7 | 1 | 1 | 1 | 1 | 7 | 7 | 7 | 1 | 5 | 1 | 4 | 1 | 1 | 1 | 1 | 1 | 4 | 1 | 1 | 1 | 1 |   |   |
| 226 | 31 | 5941582 | 88   | 12 | 1 | 1 | 1 | 5 | 5 | 4 | 1 | 6 | 3 | 2 | 1 | 29 |   | 4 | 3 | 3 | 6 | 6 | 6 | 5 | 4 | 5 | 7 | 6 | 7 | 7 | 7 | 7 | 7 | 7 | 7 | 2 | 2 | 1 | 1 | 2 | 1 | 7 | 2 | 2 | 6 | 5 | 3 | 3 | 2 | 2 | 3 | 3 | 5 | 3 | 3 | 3 |   |   |
| 227 | 31 | 5941582 | 345  | 12 | 1 | 1 | 2 | 3 | 2 | 7 | 1 | 5 | 3 | 1 |   |    |   | 1 | 1 | 1 | 1 | 1 | 1 | 1 | 4 | 4 | 4 | 4 | 4 | 4 | 1 | 1 | 1 | 1 | 1 | 4 | 1 | 3 | 7 | 4 | 4 | 4 | 4 | 4 | 4 | 4 | 4 | 4 | 4 | 4 | 4 | 4 | 5 | 4 | 4 | 4 | 5 | 4 |
| 228 | 31 | 5941582 | 36   | 12 | 3 | 1 | 2 | 5 | 5 | 4 | 1 | 5 | 3 | 1 |   |    |   | 6 | 1 | 1 | 1 | 1 | 1 | 1 | 1 | 1 | 1 | 1 | 1 | 1 | 1 | 1 | 1 | 1 | 1 | 1 | 1 | 5 | 6 | 7 | 7 | 1 | 7 | 7 | 4 | 4 | 7 | 5 | 2 | 7 | 4 | 7 | 7 | 7 | 1 | 1 |   |   |
| 229 | 31 | 5941582 | 618  | 12 | 1 | 1 | 1 | 5 | 5 | 4 | 3 | 6 | 3 | 1 | 1 | 33 |   | 4 | 3 | 3 | 6 | 5 | 5 | 6 | 6 | 5 | 3 | 4 | 5 | 4 | 4 | 4 | 4 | 5 | 7 | 7 | 3 | 2 | 1 | 5 | 4 | 4 | 5 | 4 | 4 | 1 | 2 | 3 | 4 | 1 | 2 | 1 | 3 | 4 | 3 | 4 | 5 |   |
| 23  | 31 | 5941582 | 333  | 12 | 1 | 1 | 2 | 4 | 5 | 3 | 1 | 6 | 3 | 1 |   |    |   | 7 | 6 | 7 | 7 | 7 | 7 | 7 | 7 | 7 | 7 | 7 | 7 | 7 | 7 | 7 | 7 | 6 | 6 | 1 | 1 | 1 | 1 | 1 | 1 | 7 | 2 | 2 | 1 | 1 | 1 | 1 | 1 | 1 | 1 | 1 | 7 | 4 | 1 | 7 |   |   |
| 231 | 31 | 5941582 | 818  | 12 | 1 | 1 | 2 | 6 | 5 | 3 | 1 | 4 | 5 | 1 |   |    |   | 7 | 7 | 7 | 7 | 7 | 7 | 6 | 7 | 7 | 7 | 7 | 7 | 7 | 7 | 7 | 7 | 7 | 7 | 1 | 1 | 1 | 1 | 1 | 1 | 7 | 1 | 1 | 6 | 6 | 1 | 1 | 1 | 1 | 1 | 1 | 1 | 6 | 7 | 1 | 2 |   |
| 232 | 31 | 5941582 | 535  | 12 | 1 | 1 | 2 | 7 | 5 | 7 | 1 | 5 | 3 | 1 |   |    |   | 7 | 7 | 7 | 7 | 7 | 7 | 7 | 6 | 7 | 6 | 6 | 7 | 7 | 7 | 7 | 7 | 5 | 5 | 2 | 7 | 1 | 1 | 1 | 1 | 7 | 2 | 1 | 3 | 3 | 1 | 1 | 1 | 1 | 1 | 3 | 7 | 7 | 3 | 3 |   |   |
| 233 | 31 | 5941582 | 318  | 12 | 1 | 1 | 2 | 5 | 5 | 6 | 1 | 6 | 5 | 1 |   |    |   | 7 | 7 | 7 | 7 | 5 | 5 | 4 | 4 | 4 | 7 | 4 | 7 | 5 | 5 | 7 | 7 | 4 | 4 | 1 | 1 | 1 | 1 | 1 | 6 | 1 | 1 | 1 | 1 | 1 | 1 | 1 | 1 | 1 | 1 | 1 | 1 | 1 | 3 | 1 | 5 |   |
| 234 | 31 | 5941582 | 1754 | 12 | 1 | 1 | 2 | 7 | 5 | 4 | 1 | 3 | 3 | 1 |   |    |   | 5 | 5 | 4 | 4 | 5 | 5 | 4 | 3 | 4 | 5 | 4 | 4 | 5 | 5 | 2 | 2 | 4 | 2 | 5 | 4 | 5 | 3 | 4 | 2 | 5 | 5 | 4 | 7 | 7 | 2 | 2 | 3 | 5 | 6 | 6 | 6 | 7 | 6 | 2 |   |   |
| 235 | 31 | 5941582 |      |    |   |   |   |   |   |   |   |   |   |   |   |    |   |   |   |   |   |   |   |   |   |   |   |   |   |   |   |   |   |   |   |   |   |   |   |   |   |   |   |   |   |   |   |   |   |   |   |   |   |   |   |   |   |   |



|     |    |         |      |    |   |   |   |   |   |   |   |   |   |   |   |    |    |   |   |   |   |   |   |   |   |   |   |   |   |   |   |   |   |   |   |   |   |   |   |   |   |   |   |   |   |   |   |   |   |   |   |   |   |   |   |   |   |
|-----|----|---------|------|----|---|---|---|---|---|---|---|---|---|---|---|----|----|---|---|---|---|---|---|---|---|---|---|---|---|---|---|---|---|---|---|---|---|---|---|---|---|---|---|---|---|---|---|---|---|---|---|---|---|---|---|---|---|
| 237 | 31 | 5941582 | 285  | 12 | 1 | 1 | 2 | 3 | 1 | 6 | 1 | 5 | 3 | 1 |   |    |    | 6 | 5 | 6 | 7 | 7 | 7 | 4 | 4 | 4 | 7 | 7 | 7 | 6 | 6 | 6 | 6 | 7 | 7 | 2 | 2 | 1 | 2 | 3 | 3 | 6 | 3 | 2 | 1 | 1 | 2 | 4 | 1 | 1 | 1 | 1 | 4 | 4 | 3 | 5 |   |
| 238 | 31 | 5941582 | 592  | 12 | 1 | 1 | 2 | 7 | 5 | 3 | 1 | 3 | 3 | 1 |   |    |    | 7 | 7 | 7 | 7 | 7 | 7 | 7 | 7 | 7 | 7 | 7 | 7 | 7 | 7 | 7 | 7 | 1 | 1 | 1 | 1 | 1 | 1 | 7 | 1 | 1 | 3 | 3 | 1 | 1 | 1 | 1 | 1 | 3 | 5 | 5 | 2 | 3 |   |   |   |
| 239 | 31 | 5941582 | 475  | 12 | 1 | 2 | 1 | 7 | 1 | 7 | 1 | 2 | 1 | 2 | 4 | 35 | 8  | 7 | 6 | 7 | 7 | 7 | 7 | 6 | 5 | 5 | 4 | 4 | 4 | 7 | 7 | 7 | 7 | 7 | 2 | 7 | 1 | 1 | 1 | 1 | 2 | 1 | 7 | 2 | 2 | 2 | 2 | 1 | 1 | 1 | 2 | 2 | 2 | 7 | 6 | 2 | 7 |
| 24  | 31 | 5941582 | 776  | 12 | 1 | 1 | 1 | 3 | 5 | 6 | 1 | 6 | 3 | 1 | 1 | 4  |    | 3 | 3 | 3 | 7 | 7 | 5 | 7 | 7 | 7 | 7 | 7 | 4 | 7 | 7 | 7 | 7 | 6 | 6 | 2 | 1 | 1 | 1 | 1 | 1 | 7 | 1 | 5 | 1 | 1 | 1 | 1 | 1 | 1 | 6 | 5 | 2 | 6 |   |   |   |
| 241 | 31 | 5941582 | 384  | 12 | 1 | 1 | 2 | 2 | 5 | 3 | 1 | 6 | 5 | 1 |   |    |    | 6 | 7 | 7 | 7 | 6 | 6 | 6 | 7 | 6 | 6 | 6 | 5 | 7 | 7 | 7 | 7 | 7 | 7 | 1 | 1 | 1 | 1 | 4 | 2 | 6 | 5 | 5 | 1 | 2 | 2 | 1 | 1 | 1 | 1 | 3 | 2 | 1 | 6 |   |   |
| 242 | 31 | 5941582 | 565  | 12 | 1 | 1 | 2 | 4 | 5 | 6 | 1 | 6 | 5 | 1 |   |    |    | 7 | 6 | 6 | 7 | 5 | 5 | 7 | 7 | 7 | 6 | 6 | 6 | 6 | 6 | 6 | 7 | 7 | 6 | 6 | 1 | 1 | 1 | 1 | 2 | 2 | 7 | 2 | 2 | 2 | 2 | 2 | 2 | 1 | 1 | 1 | 1 | 4 | 4 | 2 | 3 |
| 243 | 32 | 5941582 | -1   | 12 | 1 | 1 | 2 | 4 | 1 | 6 | 1 | 6 | 3 | 1 |   |    |    | 7 | 6 | 6 | 7 | 5 | 5 | 6 | 6 | 6 | 4 | 6 | 5 | 6 | 6 | 7 | 7 | 5 | 7 | 2 | 2 | 2 | 2 | 2 | 1 | 6 | 2 | 2 | 2 | 3 | 2 | 2 | 1 | 2 | 1 | 2 | 5 | 5 | 3 | 5 |   |
| 244 | 31 | 5941582 | 67   | 12 | 4 | 1 | 2 | 4 | 1 | 6 | 1 | 6 | 3 | 1 |   |    |    | 2 | 1 | 2 | 2 | 1 | 1 | 3 | 3 | 3 | 2 | 2 | 2 | 1 | 1 | 4 | 1 | 7 | 4 | 6 | 1 | 1 | 1 | 7 | 7 | 7 | 1 | 1 | 4 | 4 | 1 | 1 | 1 | 1 | 1 | 1 | 1 | 1 | 2 |   |   |
| 245 | 31 | 5941582 | 433  | 12 | 1 | 1 | 2 | 3 | 5 | 6 | 1 | 6 | 3 | 1 |   |    |    | 7 | 6 | 6 | 7 | 6 | 6 | 3 | 3 | 3 | 6 | 6 | 6 | 7 | 6 | 6 | 5 | 4 | 4 | 6 | 5 | 5 | 2 | 3 | 4 | 3 | 4 | 4 | 1 | 1 | 5 | 4 | 2 | 1 | 1 | 4 | 5 | 5 | 2 | 2 |   |
| 246 | 31 | 5941582 | 59   | 12 | 1 | 1 | 1 | 6 | 1 | 6 | 1 | 6 | 3 | 1 | 3 | 15 | 9  | 6 | 6 | 7 | 7 | 7 | 6 | 6 | 6 | 6 | 6 | 7 | 7 | 7 | 7 | 7 | 6 | 6 | 5 | 6 | 1 | 1 | 1 | 2 | 2 | 7 | 7 | 2 | 2 | 3 | 3 | 1 | 1 | 1 | 1 | 1 | 1 | 4 | 3 | 1 | 6 |
| 247 | 31 | 5941582 | 162  | 12 | 3 | 1 | 2 | 5 | 5 | 8 | 1 | 6 | 1 | 1 |   |    |    | 1 | 4 | 1 | 4 | 4 | 4 | 4 | 4 | 4 | 4 | 2 | 3 | 1 | 1 | 1 | 4 | 4 | 1 | 1 | 7 | 7 | 7 | 1 | 7 | 3 | 1 | 3 | 3 | 5 | 4 | 3 | 3 | 3 | 4 | 4 | 3 | 7 | 7 | 3 | 3 |
| 248 | 31 | 5941582 | 392  | 12 | 1 | 1 | 1 | 6 | 5 | 4 | 2 | 6 | 1 | 1 | 1 | 18 | 18 | 6 | 6 | 6 | 6 | 6 | 7 | 2 | 1 | 2 | 3 | 3 | 3 | 5 | 5 | 6 | 6 | 7 | 4 | 1 | 5 | 1 | 2 | 2 | 5 | 5 | 3 | 2 | 3 | 4 | 2 | 2 | 4 | 6 | 4 | 4 | 4 | 4 | 2 | 4 |   |
| 249 | 31 | 5941582 | 8    | 12 | 1 | 1 | 2 | 6 | 1 | 3 | 1 | 3 | 3 | 1 |   |    |    | 3 | 3 | 2 | 3 | 5 | 2 | 3 | 3 | 3 | 4 | 3 | 3 | 1 | 1 | 4 | 3 | 7 | 7 | 3 | 3 | 1 | 2 | 2 | 2 | 6 | 3 | 3 | 1 | 1 | 1 | 1 | 1 | 1 |   | 1 | 2 | 2 |   | 2 |   |
| 25  | 31 | 5941582 | 654  | 12 | 1 | 1 | 1 | 5 | 5 | 4 | 2 | 6 | 3 | 1 | 1 | 6  | 17 | 7 | 7 | 7 | 7 | 7 | 7 | 5 | 5 | 4 | 7 | 6 | 7 | 7 | 7 | 7 | 7 | 5 | 7 | 2 | 1 | 1 | 1 | 2 | 2 | 7 | 1 | 1 | 1 | 1 | 1 | 1 | 1 | 1 | 1 | 4 | 2 | 1 | 7 |   |   |
| 251 | 31 | 5941582 | 477  | 12 | 1 | 2 | 2 | 7 | 1 | 6 | 1 | 3 | 3 | 1 |   |    |    | 7 | 7 | 6 | 7 | 7 | 7 | 5 | 5 | 5 | 7 | 6 | 7 | 7 | 7 | 6 | 6 | 7 | 7 | 5 | 7 | 1 | 1 | 1 | 1 | 7 | 1 | 1 | 3 | 1 | 1 | 1 | 1 | 1 | 1 | 6 | 7 | 1 | 7 |   |   |
| 252 | 31 | 5941582 | 613  | 12 | 1 | 1 | 2 | 6 | 1 | 6 | 1 | 3 | 1 | 2 |   |    |    | 7 | 4 | 4 | 7 | 7 | 7 | 7 |   | 7 |   |   |   | 7 | 7 | 7 | 7 | 7 | 7 | 1 | 1 | 1 | 1 | 1 | 2 | 6 | 2 | 3 | 1 | 5 | 1 | 1 | 1 | 1 | 1 | 1 | 3 | 1 | 1 | 6 |   |
| 253 | 31 | 5941582 | 577  | 12 | 1 | 1 | 2 | 4 | 1 | 6 | 1 | 6 | 3 | 1 |   |    |    | 6 | 6 | 7 | 7 | 4 | 4 | 6 | 6 | 6 | 6 | 7 | 5 | 6 | 5 | 6 | 6 | 3 | 4 | 1 | 3 | 1 | 1 | 1 | 2 | 6 | 3 | 3 | 1 | 1 | 5 | 4 | 1 | 2 | 3 | 1 | 5 | 3 | 1 | 2 |   |
| 254 | 31 | 5941582 | 551  | 12 | 1 | 1 | 2 | 6 | 5 | 4 | 1 | 4 | 3 | 1 |   |    |    | 7 | 7 | 7 | 7 | 7 | 7 | 7 | 7 | 7 | 7 | 7 | 7 | 7 | 7 | 7 | 7 | 7 | 1 | 7 | 1 | 1 | 1 | 1 | 7 | 1 | 1 | 4 | 5 | 2 | 2 | 1 | 1 | 1 | 1 | 7 | 7 | 2 | 2 |   |   |
| 255 | 31 | 5941582 | 791  | 12 | 1 | 1 | 2 | 6 | 5 | 4 | 1 | 3 | 3 | 2 |   |    |    | 7 | 7 | 7 | 7 | 7 | 6 | 6 | 7 | 7 | 6 | 6 | 6 | 7 | 7 | 7 | 6 | 7 | 7 | 6 | 2 | 1 | 1 | 1 | 1 | 7 | 1 | 1 | 6 | 5 | 6 | 4 | 4 | 4 | 4 | 4 | 5 | 4 | 4 |   |   |
| 256 | 31 | 5941582 | 358  | 12 | 1 | 1 | 1 | 6 | 1 | 4 | 1 | 3 | 3 | 2 | 3 | 45 |    | 7 | 6 | 5 | 6 | 6 | 6 | 7 | 6 | 6 | 6 | 6 | 6 | 6 | 6 | 5 | 6 | 6 | 6 | 1 | 1 | 1 | 1 | 1 | 1 | 7 | 2 | 2 | 2 | 2 | 1 | 1 | 1 | 1 | 2 | 2 | 4 | 3 | 3 | 2 |   |
| 257 | 31 | 5941582 | 1147 | 12 | 4 | 1 | 2 | 7 | 1 | 8 | 3 | 5 | 3 | 1 |   |    |    | 1 | 2 | 1 | 1 | 4 | 3 | 1 | 1 | 1 | 1 | 1 | 1 | 1 | 1 | 1 | 3 | 1 | 1 | 7 | 7 | 7 | 7 | 7 | 7 | 1 | 6 | 6 | 1 | 1 | 2 | 1 | 1 | 1 | 2 | 1 | 4 | 2 | 3 | 1 |   |
| 258 | 31 | 5941582 | 567  | 11 | 3 | 1 | 2 | 3 | 1 | 7 | 6 | 5 | 1 | 2 |   |    |    | 3 | 4 | 4 | 1 |   | 2 | 6 | 5 | 6 | 4 | 5 | 4 | 1 | 1 | 4 | 4 | 7 | 7 | 6 | 1 | 1 | 1 | 7 | 1 | 5 | 3 | 3 | 1 | 1 | 4 | 1 | 1 | 1 | 1 | 1 | 4 | 5 | 1 | 5 |   |
| 259 | 31 | 5941582 | 1288 | 12 | 1 | 1 | 2 | 6 | 1 | 6 | 1 | 5 | 1 | 1 |   |    |    | 6 | 6 | 6 | 5 | 6 | 5 | 1 | 1 | 2 | 5 | 5 | 5 | 6 | 6 | 7 | 5 | 7 | 7 | 1 | 1 | 1 | 1 | 3 | 2 | 7 | 1 | 2 | 1 | 1 | 1 | 1 | 1 | 1 | 1 | 4 | 2 | 1 | 2 |   |   |
| 26  | 31 | 5941582 | 452  | 12 | 1 | 1 | 2 | 6 | 1 | 6 | 1 | 3 | 3 | 1 |   |    |    | 2 | 2 | 2 | 2 | 6 | 6 | 6 | 6 | 6 | 3 | 3 | 3 | 5 | 5 | 5 | 6 | 6 | 6 | 2 | 2 | 2 | 2 | 6 | 2 | 6 | 1 | 1 | 1 | 1 | 1 | 1 | 1 | 1 | 1 | 6 | 6 | 1 | 1 |   |   |
| 261 | 31 | 5941582 | 8    | 12 | 1 | 1 | 1 | 5 | 5 | 6 | 1 | 6 | 1 | 1 | 3 | 36 |    | 7 | 7 | 7 | 6 | 7 | 6 | 6 | 6 | 6 |   |   |   | 7 | 7 | 6 | 4 | 5 | 6 | 1 | 1 | 1 | 1 | 1 | 2 | 7 | 3 | 4 | 3 | 3 | 1 | 1 | 1 | 1 | 2 | 1 | 4 | 4 | 2 |   |   |
| 262 | 31 | 5941582 | 1181 | 12 | 1 | 1 | 2 | 7 | 5 | 3 | 1 | 3 | 3 | 2 |   |    |    | 7 | 7 | 7 | 7 | 5 | 5 | 7 | 7 | 7 | 7 | 7 | 7 | 7 | 7 | 7 | 7 | 3 | 7 | 1 | 1 | 1 | 1 | 1 | 7 | 5 | 2 | 3 | 5 | 1 | 1 | 1 | 1 | 1 | 1 | 1 | 1 | 1 | 1 | 1 |   |
| 263 | 31 | 5941582 | 514  | 12 | 1 | 1 | 2 | 2 | 5 | 3 | 1 | 6 | 3 | 1 |   |    |    | 5 | 5 | 3 | 6 | 6 | 2 | 4 | 3 | 4 | 2 | 2 | 2 | 5 | 5 | 5 | 2 | 6 | 6 | 3 | 1 | 1 | 2 | 2 | 3 | 6 | 7 | 7 | 2 | 2 | 2 | 2 | 2 | 6 | 2 | 3 | 5 | 4 | 3 | 5 |   |
| 264 | 31 | 5941582 | 584  | 12 | 1 | 1 | 2 | 3 | 5 | 6 | 1 | 6 | 5 | 1 |   |    |    | 6 | 5 | 5 | 6 | 6 | 6 | 6 | 6 | 6 | 7 | 7 | 4 | 6 | 6 | 5 | 5 | 5 | 5 | 1 | 1 | 1 | 1 | 7 | 5 | 7 | 2 | 2 | 1 | 1 | 1 | 1 | 1 | 1 | 1 | 3 | 2 | 3 | 5 |   |   |
| 265 | 32 | 5941582 | -1   | 12 | 1 | 1 | 2 | 6 | 5 | 6 | 1 | 3 | 3 | 1 |   |    |    |   |   |   |   |   |   |   |   |   |   |   |   |   |   |   |   |   |   |   |   |   |   |   |   |   |   |   |   |   |   |   |   |   |   |   |   |   |   |   |   |

|     |    |         |      |    |   |   |   |   |   |   |   |   |   |   |   |    |   |   |   |   |   |   |   |   |   |   |   |   |   |   |   |   |   |   |   |   |   |   |   |   |   |   |   |   |   |   |   |   |   |   |   |   |   |   |   |   |   |
|-----|----|---------|------|----|---|---|---|---|---|---|---|---|---|---|---|----|---|---|---|---|---|---|---|---|---|---|---|---|---|---|---|---|---|---|---|---|---|---|---|---|---|---|---|---|---|---|---|---|---|---|---|---|---|---|---|---|---|
| 267 | 31 | 5941582 | 1742 | 12 | 5 | 1 | 1 | 6 | 1 | 4 | 5 | 6 | 4 | 2 | 3 | 44 | 8 | 7 | 6 | 7 | 7 | 6 | 6 | 7 | 6 | 6 | 6 | 6 | 5 | 7 | 6 | 7 | 7 | 7 | 7 | 7 | 1 | 2 | 1 | 2 | 2 | 2 | 7 | 3 | 4 | 5 | 6 | 5 | 6 | 4 | 6 | 5 | 2 | 6 | 7 | 4 | 3 |
| 268 | 31 | 5941582 | 457  | 12 | 1 | 1 | 2 | 6 | 1 | 6 | 1 | 3 | 3 | 1 |   |    |   | 7 | 7 | 7 | 6 | 7 | 7 | 6 | 7 | 7 | 4 | 4 | 3 | 7 | 7 | 7 | 6 | 7 | 7 | 1 | 1 | 1 | 1 | 1 | 1 | 7 | 2 | 2 | 1 | 1 | 1 | 1 | 1 | 1 | 1 | 6 | 6 | 2 | 6 |   |   |
| 269 | 31 | 5941582 | 145  | 12 | 1 | 1 | 2 | 6 | 1 | 9 | 3 | 5 | 2 | 1 |   |    |   | 7 | 7 | 7 | 7 | 7 | 7 |   |   |   |   |   | 7 |   | 7 | 7 | 4 | 4 |   |   | 4 |   |   |   |   |   | 4 | 4 | 4 | 1 | 4 | 1 | 1 | 4 | 4 | 7 | 7 | 1 | 1 |   |   |
| 27  | 32 | 5941582 | -1   | 12 | 1 | 1 | 2 | 6 | 5 | 4 | 1 | 3 | 1 | 1 |   |    |   | 7 | 6 | 7 | 7 | 7 | 7 | 6 | 6 | 6 | 6 | 6 | 6 | 7 | 7 | 7 | 7 | 6 | 6 | 2 | 6 | 2 | 1 | 1 | 2 | 6 | 2 | 2 | 2 | 2 | 2 | 2 | 2 | 2 | 2 | 6 | 4 | 2 | 2 |   |   |
| 271 | 31 | 5941582 | 614  | 12 | 1 | 1 | 2 | 7 | 5 | 6 | 1 | 2 | 3 | 1 |   |    |   | 7 | 7 | 7 | 7 | 7 | 7 | 7 | 7 | 7 | 7 | 7 | 7 | 7 | 7 | 7 | 7 | 7 | 1 | 1 | 1 | 1 | 1 | 1 | 7 | 2 | 2 | 3 | 5 | 1 | 1 | 1 | 1 | 2 | 1 | 3 | 4 | 2 | 3 |   |   |
| 272 | 31 | 5941582 | 524  | 12 | 1 | 1 | 1 | 4 | 5 | 8 | 1 | 6 | 3 | 1 | 1 | 1  |   | 7 | 6 | 7 | 6 | 4 | 3 | 5 | 5 | 5 | 7 | 7 | 6 | 7 | 7 | 5 | 4 | 4 | 6 | 2 | 1 | 1 | 1 | 2 | 1 | 7 | 4 | 4 | 3 | 3 | 1 | 1 | 1 | 2 | 2 | 2 | 6 | 2 | 2 | 1 |   |
| 273 | 31 | 5941582 | 147  | 12 | 1 | 1 | 2 | 6 | 1 | 8 | 1 | 2 | 3 | 1 |   |    |   | 7 | 1 | 1 | 1 | 1 | 1 | 7 | 7 | 6 | 1 | 4 | 2 | 1 | 1 | 1 | 1 | 7 |   |   |   | 1 | 2 | 7 | 2 | 2 |   | 4 | 3 | 2 | 1 | 4 | 1 | 4 | 6 | 7 | 7 | 7 | 4 | 6 |   |
| 274 | 31 | 5941582 | 1573 | 12 | 1 | 1 | 2 | 6 | 5 | 9 | 1 | 3 | 3 | 1 |   |    |   | 3 | 3 | 3 | 2 | 4 | 3 | 1 | 1 | 1 | 3 | 3 | 3 | 3 | 3 | 3 | 3 | 3 | 3 |   |   |   |   |   |   |   |   |   |   |   |   |   |   |   |   |   |   |   |   |   |   |
| 275 | 31 | 5941582 | 165  | 12 | 1 | 1 | 2 | 5 | 1 | 4 | 1 | 5 | 3 | 2 |   |    |   | 6 | 6 | 6 | 4 | 5 | 5 | 4 | 4 | 5 | 4 | 4 | 4 | 6 | 6 | 7 | 6 | 3 | 4 | 4 | 5 | 3 | 1 | 1 | 1 | 7 | 4 | 4 | 5 | 5 | 5 | 6 | 2 | 2 | 6 | 2 | 6 | 5 | 2 | 5 |   |
| 276 | 31 | 5941582 | 3294 | 12 | 1 | 1 | 2 | 5 | 5 | 4 | 1 | 5 | 3 | 1 |   |    |   | 7 | 7 | 7 | 7 | 7 | 7 | 7 | 7 | 7 | 4 | 7 | 4 | 7 | 7 | 7 | 7 | 1 | 7 | 1 | 1 | 1 | 1 | 1 | 7 | 4 | 4 | 6 | 6 | 6 | 6 | 4 | 4 | 7 | 5 | 7 | 7 | 1 | 6 |   |   |
| 277 | 31 | 5941582 | 844  | 12 | 1 | 1 | 2 | 3 | 5 | 6 | 1 | 6 | 5 | 1 |   |    |   | 6 | 4 | 5 | 6 | 6 | 6 | 6 | 5 | 6 | 7 | 6 | 7 | 6 | 6 | 6 | 6 | 5 | 4 | 1 | 1 | 1 | 2 | 3 | 2 | 7 | 1 | 1 | 1 | 1 | 1 | 1 | 1 | 1 | 1 | 5 | 5 | 1 | 4 |   |   |
| 278 | 31 | 5941582 | 566  | 12 | 1 | 1 | 1 | 7 | 5 | 4 | 1 | 4 | 1 | 1 | 3 | 4  |   | 7 | 6 | 6 | 7 | 7 | 7 | 5 | 6 | 6 | 7 | 7 | 7 | 7 | 7 |   | 7 | 7 | 1 | 1 | 1 | 1 | 1 | 1 | 7 | 7 | 7 | 1 | 1 | 1 | 1 | 1 | 1 | 1 | 1 | 7 | 7 | 1 | 1 |   |   |
| 279 | 31 | 5941582 | 581  | 12 | 1 | 1 | 2 |   | 1 | 6 | 1 | 3 | 5 | 1 |   |    |   | 2 | 2 | 2 | 6 | 4 | 4 | 1 | 2 | 1 | 2 | 2 | 2 | 2 | 6 | 6 | 6 | 7 | 7 | 3 | 2 | 1 | 5 | 7 | 7 | 5 | 2 | 2 | 2 | 1 | 1 | 1 | 1 | 1 | 2 | 2 | 2 | 3 | 2 | 1 |   |
| 28  | 31 | 5941582 | 524  | 12 | 3 | 1 | 2 | 3 | 5 | 6 | 1 | 6 | 7 | 1 |   |    |   | 1 | 5 | 5 | 3 | 4 | 4 | 3 | 3 | 3 | 3 | 3 | 3 | 3 | 1 | 2 | 1 | 3 | 5 | 3 | 5 | 2 | 6 | 5 | 2 | 1 | 1 | 1 | 1 | 1 | 1 | 1 | 1 | 1 | 1 | 1 | 1 | 1 |   |   |   |
| 281 | 31 | 5941582 | 1483 | 12 | 1 | 1 | 2 | 5 | 5 | 6 | 1 | 4 | 3 | 1 |   |    |   | 7 | 7 | 7 | 7 | 7 | 7 | 7 | 7 | 7 | 7 | 7 | 7 | 7 | 7 | 7 | 7 | 7 | 1 | 1 | 1 | 1 | 1 | 1 | 7 | 1 | 1 | 1 | 1 | 1 | 1 | 1 | 2 | 1 | 1 | 2 | 2 | 1 | 1 |   |   |
| 282 | 31 | 5941582 | 123  | 12 | 1 | 1 | 2 | 7 | 1 | 7 | 5 | 2 | 3 | 1 |   |    |   | 7 | 7 | 7 | 7 | 7 | 7 | 7 | 7 | 7 |   | 7 | 7 | 7 | 7 | 7 | 7 | 5 | 4 | 1 | 7 | 1 |   |   |   |   |   | 1 | 1 | 1 | 1 | 2 | 2 | 7 | 7 | 1 | 7 |   |   |   |   |
| 283 | 31 | 5941582 | 311  | 12 | 1 | 1 | 2 | 3 | 5 | 6 | 1 | 7 | 3 | 1 |   |    |   | 7 | 5 | 6 | 6 | 4 | 5 | 6 | 6 | 6 | 5 | 5 | 4 | 7 | 7 | 7 | 6 | 5 | 5 | 3 | 3 | 2 | 2 | 1 | 1 | 6 | 4 | 4 | 2 | 2 | 7 | 5 | 2 | 5 | 4 | 6 | 7 | 7 | 4 | 2 |   |
| 284 | 31 | 5941582 | 1329 | 12 | 1 | 1 | 2 | 7 | 1 | 6 | 1 | 2 | 3 | 1 |   |    |   | 6 | 1 | 1 | 7 | 7 | 6 | 5 | 5 | 5 |   |   |   | 1 | 1 | 3 | 3 | 1 | 1 | 1 | 4 | 5 | 1 | 7 | 2 | 4 | 1 | 1 | 3 | 3 | 1 | 1 | 1 | 1 | 1 | 6 | 5 | 5 | 1 | 1 |   |
| 285 | 31 | 5941582 | 169  | 12 | 1 | 6 | 2 | 6 | 5 | 3 | 5 | 4 | 3 | 1 |   |    |   | 7 | 1 | 1 | 7 | 1 | 7 | 1 | 1 | 1 | 4 | 4 | 4 | 1 | 1 | 2 | 2 | 1 | 1 | 7 | 2 | 4 | 7 | 7 | 7 | 4 | 1 | 1 | 4 | 7 | 1 | 1 | 3 | 4 | 4 | 4 | 7 | 7 | 2 | 4 |   |
| 286 | 31 | 5941582 | 1342 | 12 | 1 | 1 | 2 | 7 | 1 | 4 | 4 | 2 | 3 | 1 |   |    |   | 7 | 7 | 7 | 7 | 5 | 7 | 4 | 5 | 5 | 4 | 4 | 3 | 7 | 5 | 6 | 5 | 5 | 5 | 3 | 4 | 4 | 5 | 7 | 5 | 4 | 4 | 4 | 5 | 6 | 2 | 2 | 5 | 2 | 3 | 3 | 7 | 7 | 4 | 3 |   |
| 287 | 31 | 5941582 | 518  | 12 | 1 | 1 | 2 | 4 | 5 | 7 | 1 | 7 | 1 | 1 |   |    |   | 7 | 6 | 7 | 7 | 7 | 6 | 7 | 7 | 7 | 7 | 7 | 7 | 7 | 5 | 4 | 4 | 6 | 1 | 1 | 1 | 1 | 1 | 1 | 7 | 2 | 2 | 2 | 2 | 2 | 3 | 1 | 1 | 2 | 1 | 5 | 5 | 2 | 2 |   |   |
| 288 | 31 | 5941582 | 455  | 12 | 1 | 1 | 2 | 2 | 5 | 5 | 1 | 5 | 3 | 1 |   |    |   | 2 | 2 | 3 | 1 | 2 | 3 | 6 | 5 | 6 | 5 | 5 | 5 | 5 | 6 | 5 | 4 | 7 | 7 | 2 | 2 | 1 | 2 | 4 | 3 | 7 | 1 | 1 | 2 | 1 | 1 | 1 | 1 | 1 | 1 | 2 | 3 | 4 | 2 | 5 |   |
| 289 | 31 | 5941582 | 48   | 12 | 1 | 1 | 2 | 3 | 5 | 6 | 1 | 4 | 5 | 1 |   |    |   | 7 | 4 | 6 | 4 | 5 | 5 | 3 | 3 | 3 | 5 | 5 | 5 | 4 | 4 | 4 | 3 | 7 | 7 | 1 | 2 | 1 | 2 | 2 | 5 | 6 | 3 | 3 | 2 | 2 | 2 | 2 | 1 | 1 | 2 | 2 | 3 | 3 | 3 | 3 |   |
| 29  | 31 | 5941582 | 842  | 12 | 1 | 1 | 2 | 5 | 5 | 6 | 1 | 6 | 1 | 3 |   |    |   | 5 | 4 | 7 | 7 | 6 | 6 | 7 | 7 | 7 |   |   |   | 7 | 7 | 7 | 7 | 3 | 4 | 2 | 3 | 1 | 1 | 1 | 1 | 7 |   |   | 3 | 4 | 4 | 4 | 2 | 3 | 2 | 2 | 6 | 5 | 1 | 5 |   |
| 291 | 31 | 5941582 | 39   | 12 | 1 | 1 | 2 | 5 | 5 | 6 | 1 | 6 | 6 | 1 |   |    |   | 4 | 2 | 2 | 5 | 4 | 4 | 3 | 1 | 3 | 5 | 5 | 4 | 2 | 3 | 7 | 5 | 2 | 3 | 4 | 6 | 3 | 2 | 3 | 3 | 5 | 4 | 4 | 5 | 5 | 2 | 2 | 2 | 2 | 2 | 2 | 4 | 3 | 2 | 2 |   |
| 292 | 31 | 5941582 | 141  | 12 | 1 | 1 | 2 | 6 | 5 | 4 | 1 | 5 | 3 | 1 |   |    |   | 7 | 4 | 4 | 7 | 7 | 7 | 3 | 3 | 3 | 5 | 5 | 5 | 6 | 6 | 7 | 7 | 5 | 6 | 1 | 1 | 1 | 3 | 3 | 2 | 6 | 2 | 4 | 5 | 3 | 1 | 2 | 2 | 5 | 3 | 2 | 5 | 6 | 2 | 4 |   |
| 293 | 31 | 5941582 | 712  | 12 | 1 | 1 | 2 | 6 | 5 | 6 | 1 | 4 | 3 | 1 |   |    |   | 7 |   |   |   | 7 | 7 | 5 | 5 | 5 | 6 | 6 | 6 | 7 | 6 | 5 | 4 | 7 | 7 | 2 | 2 | 1 | 1 | 1 | 2 | 6 | 4 | 4 | 1 | 1 | 1 | 1 | 1 | 1 | 6 | 2 | 4 | 4 | 2 | 2 |   |
| 294 | 31 | 5941582 | 466  | 12 | 1 | 1 | 2 | 5 | 5 | 6 | 1 | 6 | 3 | 1 |   |    |   | 5 | 3 | 6 | 7 | 4 | 7 | 6 | 6 | 6 | 6 | 6 | 6 | 6 | 6 | 6 | 4 | 4 | 4 | 1 | 2 | 1 | 1 | 1 | 1 | 7 | 4 | 4 | 3 | 3 | 4 | 2 | 2 | 2 | 2 | 2 | 6 | 4 | 3 | 3 |   |
| 295 | 31 | 5941582 | 449  | 12 | 1 | 1 | 2 | 5 | 5 | 4 | 1 | 4 | 3 | 1 |   |    |   | 5 | 3 | 5 | 7 | 5 | 5 | 1 | 1 | 1 | 3 | 3 | 1 | 5 | 3 | 7 | 7 | 7 | 7 | 7 | 1 | 1 | 1 | 1 | 7 | 1 | 1 | 1 | 1 | 7 | 1 | 1 | 1 | 1 | 1 | 1 | 7 | 1 | 3 |   |   |
| 296 | 31 | 5941582 | 493  | 12 | 1 | 1 | 2 | 2 | 5 | 3 | 3 | 7 | 2 | 1 |   |    |   |   |   |   |   |   |   |   |   |   |   |   |   |   |   |   |   |   |   |   |   |   |   |   |   |   |   |   |   |   |   |   |   |   |   |   |   |   |   |   |   |

|     |    |         |      |    |   |   |   |   |   |   |   |   |   |   |   |    |   |   |   |   |   |   |   |   |   |   |   |   |   |   |   |   |   |   |   |   |   |   |   |   |   |   |   |   |   |   |   |   |   |   |   |   |   |   |   |   |   |
|-----|----|---------|------|----|---|---|---|---|---|---|---|---|---|---|---|----|---|---|---|---|---|---|---|---|---|---|---|---|---|---|---|---|---|---|---|---|---|---|---|---|---|---|---|---|---|---|---|---|---|---|---|---|---|---|---|---|---|
| 297 | 31 | 5941582 | 747  | 12 | 1 | 1 | 2 | 6 | 5 | 3 | 1 | 3 | 3 | 1 |   |    |   | 7 | 7 | 7 | 7 | 7 | 7 | 5 | 5 | 5 | 6 | 6 | 7 | 7 | 7 | 7 | 7 | 7 | 7 | 7 | 1 | 1 | 1 | 1 | 1 | 1 | 7 | 1 | 1 | 1 | 1 | 1 | 1 | 1 | 1 | 1 | 3 | 3 | 1 | 1 |   |
| 298 | 31 | 5941582 | 341  | 12 | 1 | 1 | 2 | 4 | 5 | 6 | 1 | 6 | 3 | 1 |   |    |   | 5 | 5 | 5 | 7 | 6 | 5 | 6 | 6 | 4 | 7 | 7 | 7 | 7 | 7 | 7 | 5 | 6 | 6 | 1 | 1 | 1 | 1 | 1 | 1 | 7 | 6 | 6 | 3 | 4 | 3 | 1 | 1 | 1 | 3 | 2 | 5 | 5 | 3 | 1 |   |
| 299 | 31 | 5941582 | 229  | 12 | 1 | 1 | 2 | 6 | 5 | 8 | 1 | 5 | 1 | 1 |   |    |   | 7 | 7 | 7 | 2 | 7 | 2 | 4 | 7 | 6 | 5 | 5 | 4 | 4 | 4 | 5 | 7 | 1 | 1 | 7 | 7 | 7 | 4 | 1 | 7 | 5 | 1 | 1 | 7 | 7 | 7 | 7 | 7 | 7 | 7 | 3 | 4 |   |   |   |   |
| 3   | 31 | 5941582 | 969  | 12 | 1 | 1 | 2 | 5 | 5 | 3 | 1 | 7 | 1 | 1 |   |    |   | 1 | 3 | 4 | 7 | 7 | 6 | 7 | 7 | 7 | 7 | 4 | 2 | 3 | 3 | 6 | 3 | 3 | 3 | 4 | 4 | 3 | 7 | 7 | 4 | 5 | 5 | 5 | 2 | 4 | 4 | 3 | 1 | 2 | 2 | 4 | 5 | 4 | 3 | 5 |   |
| 31  | 31 | 5941582 | 416  | 12 | 1 | 1 | 2 | 6 | 5 | 3 | 1 | 6 | 1 | 1 |   |    |   | 7 | 5 | 3 | 7 | 3 | 3 | 2 | 3 | 2 | 4 | 3 | 3 | 3 | 5 | 5 | 3 | 5 | 5 | 1 | 2 | 1 | 3 | 5 | 5 | 6 | 2 | 2 | 5 | 6 | 2 | 2 | 2 | 1 | 3 | 3 | 7 | 3 | 2 | 3 |   |
| 32  | 31 | 5941582 | 1898 | 12 | 1 | 1 | 2 | 6 | 5 | 3 | 1 | 3 | 3 | 2 |   |    |   | 7 | 4 | 4 | 7 | 4 | 4 | 6 | 6 | 6 | 7 | 7 | 7 | 7 | 7 | 7 | 7 | 7 | 7 | 1 | 1 | 1 | 1 | 1 | 1 | 7 | 7 | 1 | 2 | 4 | 1 | 1 | 1 | 1 | 3 | 3 | 4 | 4 | 1 | 4 |   |
| 33  | 31 | 5941582 | 656  | 12 | 1 | 1 | 2 | 6 | 5 | 4 | 1 | 6 | 6 | 1 |   |    |   | 7 | 2 | 6 | 7 | 6 | 6 | 7 |   | 6 | 7 |   |   | 6 | 6 | 5 | 5 | 6 | 6 | 1 | 1 | 1 | 2 | 3 | 2 |   | 4 | 4 | 5 | 7 | 1 | 1 | 1 | 4 | 5 | 5 | 5 | 6 | 1 | 1 |   |
| 34  | 31 | 5941582 | 526  | 12 | 4 | 1 | 2 | 2 | 5 | 3 | 1 | 6 | 6 | 2 |   |    |   | 4 | 1 | 4 | 1 | 1 | 1 | 1 | 1 | 1 | 1 | 1 | 1 | 1 | 1 | 1 | 7 | 6 | 1 | 1 | 1 | 4 | 7 | 7 | 4 | 2 | 1 | 1 | 1 | 1 | 1 | 1 | 1 | 2 | 1 | 1 | 1 | 1 | 1 |   |   |
| 35  | 31 | 5941582 | 651  | 12 | 1 | 1 | 1 | 3 | 5 | 5 | 1 | 6 | 3 | 1 | 1 | 4  |   | 7 | 3 | 6 | 3 | 7 | 5 | 7 | 3 | 7 | 3 | 3 | 3 | 7 | 7 | 7 | 4 | 7 | 5 | 1 | 2 | 1 | 1 | 1 | 1 | 6 | 1 | 1 | 1 | 1 | 1 | 1 | 1 | 1 | 2 | 6 | 6 | 1 | 7 |   |   |
| 36  | 31 | 5941582 | 1413 | 12 | 1 | 1 | 2 | 6 | 5 | 4 | 1 | 3 | 3 | 1 |   |    |   | 7 | 7 | 7 | 7 | 7 | 7 | 7 | 7 | 7 | 7 | 7 | 7 | 7 | 7 | 5 | 4 | 7 | 1 | 1 | 1 | 1 | 1 | 1 | 7 | 5 | 5 | 7 | 7 | 2 | 2 | 1 | 1 | 2 | 1 | 7 | 4 | 1 | 3 |   |   |
| 37  | 31 | 5941582 | 412  | 11 | 1 | 1 | 2 | 5 | 5 | 6 | 1 | 5 | 1 | 1 |   |    |   | 4 | 1 | 3 | 2 | 5 | 4 | 7 | 7 | 7 | 1 | 1 | 1 | 2 | 2 | 1 | 5 | 6 | 4 | 1 | 2 | 1 | 1 | 4 | 1 | 7 | 1 | 1 | 1 | 2 | 1 | 1 | 1 | 1 | 1 | 1 | 2 | 4 | 1 | 1 |   |
| 38  | 31 | 5941582 | 466  | 12 | 1 | 1 | 2 | 6 | 5 | 3 | 1 | 3 | 3 | 1 |   |    |   | 7 | 6 | 6 | 7 | 6 | 6 | 5 | 5 | 5 | 6 | 6 | 7 | 7 | 7 | 7 | 7 | 7 | 7 | 4 | 2 | 1 | 4 | 1 | 1 | 1 | 7 | 4 | 6 | 6 | 6 | 7 | 7 | 2 | 6 | 7 | 5 | 7 | 7 | 5 | 6 |
| 39  | 31 | 5941582 | 157  | 12 | 1 | 1 | 2 | 6 | 5 | 6 | 1 | 4 | 3 | 1 |   |    |   | 3 | 3 | 3 | 2 | 2 | 2 | 3 | 3 | 3 | 4 | 4 | 4 | 3 | 4 | 2 | 3 | 5 | 2 | 6 | 5 | 4 | 5 | 7 | 4 | 5 | 3 | 4 | 2 | 2 | 1 | 1 | 1 | 1 | 1 | 2 | 6 | 3 | 1 | 1 |   |
| 31  | 31 | 5941582 | 595  | 12 | 1 | 1 | 1 | 6 | 5 | 6 | 1 | 6 | 3 | 1 | 3 | 35 | 1 | 7 | 7 | 7 | 7 | 7 | 7 | 7 | 7 | 7 | 7 | 7 | 7 | 7 | 7 | 7 | 7 | 7 | 1 | 1 | 1 | 1 | 1 | 1 | 7 | 1 | 1 | 4 | 4 | 1 | 1 | 1 | 1 | 1 | 1 | 1 | 5 | 5 | 1 | 7 |   |
| 311 | 31 | 5941582 | 869  | 12 | 1 | 1 | 2 | 6 | 5 | 3 | 1 | 3 | 1 | 1 |   |    |   | 5 | 5 | 5 | 7 | 7 | 6 | 5 | 2 | 4 | 4 | 2 | 4 | 5 | 6 | 7 | 7 | 5 | 5 | 1 | 1 | 1 | 1 | 1 | 6 | 7 | 6 | 7 | 5 | 7 | 1 | 1 | 1 | 1 | 1 | 1 | 3 | 2 | 1 | 3 |   |
| 312 | 31 | 5941582 | 46   | 12 | 1 | 1 | 2 |   | 5 | 3 | 1 | 5 | 3 | 1 |   |    |   | 7 | 6 | 7 | 7 | 7 | 3 | 4 | 4 | 5 | 7 | 5 | 5 | 7 | 7 | 7 | 6 | 7 | 7 | 6 | 1 | 1 | 1 | 1 | 2 | 7 | 3 | 3 | 1 | 7 | 1 | 1 | 1 | 1 | 1 | 1 | 7 | 7 | 1 | 4 |   |
| 313 | 31 | 5941582 | 645  | 12 | 3 | 1 | 2 | 6 | 5 | 5 | 6 | 4 | 3 | 2 |   |    |   | 2 | 1 | 1 | 1 | 1 | 1 | 4 | 4 | 5 | 2 | 2 | 3 | 1 | 1 | 2 | 3 | 1 | 1 | 7 | 6 | 2 | 1 | 7 | 2 | 6 | 4 | 4 | 2 | 2 | 2 | 2 | 2 | 4 | 2 | 2 | 4 | 4 | 3 | 2 |   |
| 314 | 32 | 5941582 | -1   | 12 | 3 | 1 | 2 | 4 | 5 | 6 | 1 | 5 | 3 | 1 |   |    |   | 7 | 5 | 5 | 5 | 6 | 6 | 6 | 5 | 6 | 7 | 7 | 7 | 7 | 7 | 7 | 6 | 6 | 6 | 1 | 1 | 1 | 1 | 1 | 7 | 2 | 2 | 1 | 1 | 1 | 1 | 1 | 1 | 1 | 1 | 2 | 1 | 1 | 1 |   |   |
| 315 | 31 | 5941582 | 216  | 12 | 1 | 1 | 2 | 2 | 1 | 3 | 1 | 4 | 3 | 1 |   |    |   | 6 | 6 | 5 | 6 | 4 | 4 | 6 | 5 | 5 | 4 | 5 | 4 | 5 | 5 | 6 | 4 | 4 | 4 | 2 | 1 | 3 | 2 | 2 | 2 | 6 | 2 | 2 | 2 | 3 | 1 | 2 | 1 | 2 | 2 | 1 | 2 | 2 | 2 | 4 |   |
| 316 | 31 | 5941582 | 327  | 12 | 1 | 1 | 2 | 7 | 1 | 4 | 1 | 3 | 3 | 2 |   |    |   | 6 | 5 | 6 | 6 | 6 | 6 | 5 | 3 | 5 | 6 | 5 | 5 | 6 | 6 | 5 | 5 | 5 | 5 | 1 | 1 | 1 | 2 |   | 2 | 7 | 4 | 4 | 5 | 5 | 1 | 1 | 3 | 3 | 3 | 2 | 4 | 3 | 4 | 4 |   |
| 317 | 31 | 5941582 | 943  | 12 | 1 | 1 | 2 | 6 | 1 | 4 | 1 | 4 | 1 | 1 |   |    |   | 7 | 6 | 7 | 7 | 7 | 7 | 7 |   | 7 | 6 | 6 |   | 7 | 7 | 7 | 7 | 7 | 7 | 1 | 7 | 1 | 1 | 1 | 1 | 7 | 5 | 5 | 5 | 6 | 7 | 3 | 4 | 5 | 5 | 5 | 7 | 7 | 4 | 3 |   |
| 318 | 31 | 5941582 | 765  | 12 | 1 | 1 | 2 | 3 | 5 | 6 | 1 | 5 | 3 | 1 |   |    |   | 6 | 5 | 5 | 7 | 7 | 7 | 7 | 7 | 7 | 1 | 1 | 1 | 6 | 6 | 7 |   | 6 | 7 | 1 | 1 | 1 | 1 | 1 | 2 | 7 | 4 | 5 | 3 | 2 | 1 | 1 | 1 | 1 | 2 | 1 | 6 | 3 | 3 | 5 |   |
| 319 | 31 | 5941582 | 716  | 12 | 1 | 1 | 2 | 5 | 5 | 7 | 1 | 6 | 3 | 1 |   |    |   | 7 | 7 | 7 | 7 | 7 | 5 | 6 | 6 | 7 | 7 | 7 | 7 | 7 | 7 | 7 | 7 | 7 | 1 | 1 | 1 | 2 | 2 | 1 | 7 | 4 | 4 | 3 | 3 | 2 | 1 | 1 | 1 | 1 | 1 | 1 | 1 | 1 | 1 | 1 |   |
| 32  | 31 | 5941582 | 726  | 12 | 1 | 4 | 2 | 4 | 1 | 4 | 6 | 1 | 7 | 1 |   |    |   | 7 | 5 | 5 | 4 | 5 | 5 | 5 | 5 | 5 | 5 | 3 | 3 | 5 | 5 | 5 | 4 | 5 | 5 | 1 | 1 | 1 | 1 | 3 | 2 | 6 | 2 | 2 | 2 | 2 | 2 | 2 | 1 | 1 | 2 | 2 | 6 | 5 | 2 | 2 |   |
| 321 | 31 | 5941582 | 57   | 12 | 1 | 1 | 2 | 1 | 5 | 2 | 6 | 8 | 7 | 3 |   |    |   | 7 | 4 | 1 | 7 | 7 | 6 | 5 | 7 | 7 | 7 | 7 | 7 | 7 | 7 | 4 | 7 | 7 | 1 | 1 | 1 | 1 | 1 | 1 | 7 | 1 | 1 | 1 | 1 | 1 | 1 | 1 | 1 | 1 | 1 | 5 | 2 | 3 | 1 |   |   |
| 322 | 31 | 5941582 | 438  | 12 | 1 | 1 | 2 | 5 | 1 | 6 | 1 | 4 | 1 | 1 |   |    |   | 6 | 4 | 7 | 7 | 7 | 4 | 1 | 1 | 1 | 6 | 4 | 4 | 5 | 5 | 6 | 5 | 6 | 6 | 1 | 1 | 1 | 1 | 1 | 3 | 7 | 4 | 2 | 1 | 4 | 1 | 1 | 1 | 1 | 1 | 1 | 5 | 4 | 1 | 4 |   |
| 323 | 31 | 5941582 | 141  | 12 | 1 | 1 | 2 | 2 | 5 | 3 | 1 | 7 | 1 | 2 |   |    |   | 7 | 6 | 7 | 6 | 6 | 6 | 7 | 7 | 7 | 4 | 4 | 4 | 6 | 7 | 7 | 7 | 4 | 7 | 1 | 1 | 1 | 1 | 1 | 7 | 1 | 1 | 1 | 2 | 1 | 1 | 1 | 1 | 1 | 1 | 1 | 1 | 4 | 1 | 7 |   |
| 324 | 31 | 5941582 | 928  | 12 | 1 | 1 | 2 | 5 | 5 | 6 | 1 | 4 | 3 | 1 |   |    |   | 7 | 1 | 7 | 7 | 4 | 6 | 7 | 7 | 7 | 7 |   |   | 7 | 7 | 7 | 7 | 5 | 5 | 1 | 5 | 1 | 1 | 1 | 1 | 7 | 2 | 2 | 4 | 4 | 4 | 3 | 3 | 4 | 4 | 3 | 5 | 3 | 5 | 6 |   |
| 325 | 31 | 5941582 | 64   | 12 | 1 | 1 | 2 | 4 | 5 | 4 | 1 | 6 | 3 | 1 |   |    |   | 6 | 3 | 3 | 3 | 5 | 5 | 5 | 5 | 5 | 6 | 6 | 6 | 5 | 6 | 6 | 4 | 4 | 2 | 2 | 2 |   |   |   |   |   |   |   |   |   |   |   |   |   |   |   |   |   |   |   |   |

|     |    |         |      |    |   |   |   |   |   |   |   |   |   |   |   |    |   |   |   |   |   |   |   |   |   |   |   |   |   |   |   |   |   |   |   |   |   |   |   |   |   |   |   |   |   |   |   |   |   |   |   |   |   |   |   |   |   |   |   |   |
|-----|----|---------|------|----|---|---|---|---|---|---|---|---|---|---|---|----|---|---|---|---|---|---|---|---|---|---|---|---|---|---|---|---|---|---|---|---|---|---|---|---|---|---|---|---|---|---|---|---|---|---|---|---|---|---|---|---|---|---|---|---|
| 327 | 31 | 5941582 | 67   | 12 | 1 | 1 | 2 | 3 | 1 | 4 | 1 | 7 | 3 | 1 |   |    |   | 7 | 7 | 7 | 7 | 7 | 7 | 7 | 7 | 7 | 3 | 3 | 3 | 7 | 7 | 7 | 7 | 4 | 4 | 1 | 1 | 1 | 1 | 1 | 1 | 7 | 4 | 4 | 4 | 4 | 7 | 4 | 1 | 1 | 1 | 1 | 4 | 5 | 1 | 4 |   |   |   |   |
| 328 | 31 | 5941582 | 584  | 12 | 1 | 1 | 2 | 3 | 5 | 6 | 1 | 6 | 5 | 1 |   |    |   | 6 | 6 | 6 | 6 | 6 | 7 | 6 | 6 | 6 | 6 | 6 | 5 | 5 | 7 | 7 | 6 | 6 | 1 | 1 | 1 | 1 | 2 | 1 | 7 | 2 | 2 | 4 | 4 | 1 | 1 | 2 | 2 | 2 | 3 | 4 | 4 | 2 | 2 |   |   |   |   |   |
| 329 | 31 | 5941582 | 396  | 12 | 1 | 1 | 1 | 3 | 1 | 4 | 1 | 6 | 1 | 1 | 2 | 1  | 6 | 7 | 5 | 6 | 7 | 6 | 6 | 6 | 4 | 5 | 5 | 5 | 6 | 6 | 4 | 4 | 4 | 5 | 5 | 3 | 6 | 5 | 5 | 3 | 3 | 3 | 3 |   |   |   |   |   |   |   |   |   |   |   |   |   |   |   |   |   |
| 33  | 31 | 5941582 | 34   | 12 | 1 | 1 | 2 | 1 | 1 | 3 | 1 | 8 | 1 | 1 |   |    |   | 7 | 6 | 2 | 7 | 2 | 2 | 6 | 6 | 7 | 5 | 1 | 1 | 6 | 7 | 7 | 5 | 2 | 7 | 1 | 1 | 1 | 2 | 1 | 2 | 2 | 1 | 1 | 1 | 1 | 1 | 1 | 1 | 1 | 1 | 4 | 5 | 2 | 1 |   |   |   |   |   |
| 331 | 31 | 5941582 | 518  | 12 | 1 | 1 | 2 | 4 | 1 | 5 | 1 | 5 | 3 | 1 |   |    |   | 6 | 7 | 6 | 7 | 7 | 7 | 7 | 7 | 7 | 7 | 4 | 4 | 4 | 7 | 7 | 7 | 7 | 7 | 7 | 1 | 1 | 1 | 1 | 1 | 2 | 7 | 1 | 1 | 2 | 2 | 1 | 1 | 1 | 1 | 1 | 2 | 4 | 3 | 2 | 1 |   |   |   |
| 332 | 31 | 5941582 | 596  | 12 | 1 | 1 | 2 | 6 | 1 | 4 | 1 | 5 | 3 | 1 |   |    |   | 2 | 2 | 4 | 7 | 4 | 2 | 4 | 3 | 4 | 1 | 2 | 4 | 6 | 4 | 1 | 1 | 4 | 4 | 1 | 4 | 4 | 4 | 3 | 4 | 4 | 1 | 1 | 3 | 3 | 1 | 5 | 1 | 1 | 1 | 4 | 2 | 2 | 1 | 4 |   |   |   |   |
| 333 | 31 | 5941582 | 785  | 12 | 1 | 1 | 1 | 5 | 1 | 6 | 1 | 6 | 5 | 1 | 1 | 7  |   | 2 | 1 | 7 | 1 | 1 | 1 | 1 | 1 | 1 | 1 | 1 | 5 | 5 | 1 | 1 | 1 | 1 | 2 | 2 | 7 | 7 | 7 | 7 | 7 | 3 | 2 | 5 | 5 | 7 | 7 | 1 | 7 | 7 | 7 | 7 | 7 | 7 | 2 | 7 | 7 |   |   |   |
| 334 | 31 | 5941582 | 1333 | 12 | 1 | 1 | 2 | 2 | 5 | 3 | 1 | 7 | 1 | 1 |   |    |   | 6 | 7 | 7 | 7 | 7 | 7 | 6 | 5 | 6 | 6 | 7 | 4 | 7 | 7 | 7 | 6 | 7 | 7 |   | 2 | 4 | 1 | 2 | 1 | 7 | 4 | 4 | 5 | 4 | 5 | 7 | 7 | 7 | 7 | 3 | 6 | 2 | 3 | 6 |   |   |   |   |
| 335 | 32 | 5941582 | -1   | 12 | 1 | 1 | 2 | 5 | 5 | 6 | 1 | 5 | 1 | 1 |   |    |   | 6 | 6 | 5 | 5 | 7 | 6 | 5 | 5 | 5 | 7 | 7 | 7 | 6 | 6 | 7 | 7 | 7 | 7 | 1 | 1 | 1 | 1 | 2 | 1 | 7 | 2 | 2 | 1 | 1 | 1 | 1 | 1 | 1 | 1 | 1 | 6 | 3 | 1 | 7 |   |   |   |   |
| 336 | 31 | 5941582 | 41   | 12 | 1 | 1 | 2 | 2 | 1 | 3 | 1 | 5 | 3 | 1 |   |    |   | 7 | 5 | 3 | 7 | 6 | 7 | 7 | 5 | 6 | 4 | 6 | 5 | 6 | 6 | 7 | 7 | 4 | 4 | 2 | 2 | 1 | 2 | 2 | 2 | 7 | 6 | 3 | 1 | 2 | 5 | 1 | 1 | 1 | 2 | 5 | 7 | 6 | 2 | 6 |   |   |   |   |
| 337 | 31 | 5941582 | 125  | 12 | 1 | 1 | 1 | 2 | 5 | 3 | 1 | 1 | 3 | 2 | 1 | 2  |   | 7 | 7 | 7 | 7 | 6 | 5 | 4 | 3 | 3 | 6 | 6 | 6 | 7 | 7 | 7 | 5 | 7 | 6 | 1 | 1 | 1 | 1 | 1 | 1 | 7 | 3 | 4 | 1 | 2 | 1 | 1 | 1 | 1 | 1 | 1 | 1 | 1 | 1 | 1 |   |   |   |   |
| 338 | 31 | 5941582 | 54   | 12 | 1 | 1 | 2 | 6 | 5 | 3 | 2 | 2 | 3 | 1 |   |    |   | 4 | 4 | 4 | 4 | 6 | 4 | 4 | 4 | 4 | 4 | 4 | 4 | 6 | 5 | 6 | 4 | 3 | 2 | 4 | 4 | 7 | 4 | 4 | 4 | 4 | 4 | 4 | 5 | 6 | 4 | 3 | 2 | 3 | 4 | 3 | 4 | 5 | 4 | 4 |   |   |   |   |
| 339 | 31 | 5941582 | 6    | 12 | 1 | 1 | 2 | 2 | 5 | 3 | 1 | 7 | 3 | 1 |   |    |   | 7 | 3 | 5 | 6 | 3 | 6 | 3 | 2 | 2 | 6 | 5 | 4 | 7 | 7 | 7 | 4 | 7 | 7 | 1 | 2 | 2 | 1 | 5 | 2 | 7 | 3 | 3 | 1 | 1 | 1 | 1 | 1 | 1 | 1 | 1 | 2 | 1 | 3 | 1 | 1 |   |   |   |
| 34  | 31 | 5941582 | 279  | 12 | 1 | 1 | 2 | 2 | 5 | 3 | 1 | 6 | 1 | 1 |   |    |   | 7 | 7 | 7 | 7 | 6 | 7 | 7 | 6 | 5 | 4 | 4 | 6 | 7 | 7 | 7 | 7 | 1 | 7 | 1 | 1 | 1 | 1 | 1 | 7 | 4 | 4 | 2 | 2 | 4 | 4 | 1 | 1 | 2 | 1 | 6 | 5 | 4 | 4 |   |   |   |   |   |
| 341 | 31 | 5941582 | 543  | 12 | 1 | 1 | 2 | 2 | 1 | 3 | 1 | 6 | 3 | 1 |   |    |   | 7 | 5 | 4 | 3 | 2 | 2 | 6 | 6 | 6 | 5 | 5 | 6 | 5 | 5 | 5 | 5 | 7 | 7 | 1 | 1 | 1 | 1 | 3 | 1 | 7 | 5 | 5 | 1 | 1 | 1 | 3 | 1 | 1 | 1 | 1 | 4 | 3 | 1 | 1 |   |   |   |   |
| 342 | 31 | 5941582 | 588  | 12 | 1 | 1 | 1 | 3 | 5 | 4 | 1 | 6 | 3 | 1 | 1 | 1  | 5 | 6 | 7 | 7 | 7 | 7 | 5 | 7 | 7 | 7 | 7 | 7 | 7 | 7 | 7 | 7 | 5 | 7 | 7 | 1 | 1 | 1 | 2 | 1 | 1 | 7 | 6 | 2 | 1 | 1 | 1 | 1 | 2 | 2 | 2 | 2 | 7 | 1 | 1 | 7 |   |   |   |   |
| 343 | 31 | 5941582 | 636  | 12 | 1 | 6 | 2 | 3 | 5 | 3 | 2 | 7 | 1 | 2 |   |    |   | 7 | 7 | 7 | 7 | 7 | 7 | 7 | 7 | 7 | 7 | 7 | 5 | 7 | 7 | 7 | 7 | 7 | 1 | 1 | 1 | 1 | 1 | 5 | 7 | 3 | 2 | 1 | 1 | 1 | 1 | 1 | 1 | 1 | 1 | 1 | 7 | 7 | 4 | 5 |   |   |   |   |
| 344 | 31 | 5941582 | 178  | 12 | 1 | 1 | 2 | 6 | 5 | 6 | 1 | 4 | 3 | 1 |   |    |   | 4 | 2 | 2 | 6 | 3 | 5 | 6 | 6 | 6 | 6 | 4 | 5 | 6 | 5 | 6 | 6 | 6 | 6 | 2 | 2 | 2 |   |   | 6 | 6 | 5 | 5 | 4 | 3 | 3 | 3 | 2 | 2 | 2 | 2 | 5 | 6 | 3 | 3 |   |   |   |   |
| 345 | 32 | 5941582 | -1   | 12 | 1 | 1 | 2 | 7 | 5 | 4 | 1 | 3 | 1 | 1 |   |    |   | 7 | 7 | 7 | 7 | 7 | 7 | 7 | 7 | 7 | 7 | 7 | 7 | 7 | 7 | 7 | 7 | 7 | 7 | 7 | 7 | 7 | 7 | 7 | 7 | 7 | 1 | 1 | 1 | 1 | 4 | 4 | 6 | 6 | 1 | 1 | 1 | 4 | 1 | 1 | 7 | 4 | 1 | 7 |
| 346 | 31 | 5941582 | 859  | 12 | 1 | 1 | 2 | 4 | 5 | 5 | 1 | 5 | 1 | 1 |   |    |   | 7 | 7 | 7 | 7 | 7 | 7 | 7 | 6 | 6 | 7 | 7 | 7 | 7 | 7 | 7 | 7 | 7 | 4 | 5 | 1 | 1 | 2 | 1 | 1 | 1 | 7 | 3 | 3 | 4 | 5 | 3 | 3 | 5 | 7 | 6 | 6 | 7 | 7 | 5 | 7 |   |   |   |
| 347 | 31 | 5941582 | 1354 | 12 | 1 | 1 | 2 | 5 | 1 | 6 | 1 | 6 | 5 | 1 |   |    |   | 2 | 2 | 1 | 6 | 5 | 6 | 3 | 3 | 3 | 1 | 1 | 1 | 1 | 1 | 2 | 1 | 6 | 6 | 6 | 4 | 4 | 2 | 6 | 7 | 5 | 4 | 4 | 2 | 2 | 2 | 2 | 2 | 2 | 3 | 2 | 4 | 4 | 2 | 2 |   |   |   |   |
| 348 | 31 | 5941582 | 392  | 12 | 1 | 1 | 2 | 3 | 1 | 6 | 1 | 6 | 3 | 1 |   |    |   | 2 | 6 | 7 | 5 | 4 | 5 | 7 | 7 | 7 | 7 | 1 | 4 | 3 | 2 | 2 | 7 | 7 | 1 | 1 | 1 | 1 | 1 | 1 | 7 | 5 | 6 | 3 | 2 | 2 | 1 | 1 | 1 | 1 | 1 | 5 | 5 | 1 | 1 |   |   |   |   |   |
| 349 | 31 | 5941582 | 58   | 12 | 1 | 1 | 2 | 5 | 1 | 3 | 1 | 7 | 1 | 1 |   |    |   | 6 | 7 | 6 | 7 | 7 | 7 | 6 | 6 | 6 | 6 | 6 | 6 | 6 | 6 | 7 | 7 | 6 | 6 | 1 | 1 | 1 | 2 | 2 | 2 | 7 | 2 | 2 | 2 | 2 | 2 | 2 | 1 | 1 | 2 | 2 | 7 | 7 | 2 | 2 |   |   |   |   |
| 35  | 32 | 5941582 | -1   | 12 | 1 | 1 | 2 | 8 | 1 | 2 | 2 | 1 | 3 | 1 |   |    |   | 7 | 6 | 5 | 6 | 7 | 7 | 5 | 6 | 6 | 4 | 7 | 4 | 7 | 7 | 7 | 7 | 6 | 6 | 2 | 1 | 1 | 2 | 1 | 1 | 7 | 4 | 4 | 5 | 5 | 2 | 4 | 3 | 2 | 4 | 2 | 5 | 5 | 3 | 5 |   |   |   |   |
| 351 | 31 | 5941582 | 342  | 12 | 1 | 1 | 2 | 5 | 1 | 5 | 1 | 7 | 6 | 1 |   |    |   | 2 | 2 | 2 | 2 | 2 | 3 | 3 | 3 | 3 | 2 | 3 | 2 | 3 | 3 | 3 | 2 | 5 | 6 | 4 | 3 | 4 | 6 | 7 | 5 | 4 | 5 | 5 | 2 | 2 | 3 | 3 | 2 | 4 | 2 | 3 | 4 | 4 | 3 | 3 |   |   |   |   |
| 352 | 31 | 5941582 | 546  | 12 | 1 | 1 | 2 | 5 | 1 | 3 | 1 | 5 | 1 | 1 |   |    |   | 7 | 7 | 7 | 7 | 7 | 7 | 5 | 5 | 5 | 6 | 7 | 7 | 7 | 7 | 7 | 7 | 7 | 1 | 1 | 1 | 1 | 2 | 1 | 7 | 1 | 1 | 1 | 1 | 1 | 1 | 1 | 1 | 1 | 1 | 1 | 1 | 1 | 1 | 1 |   |   |   |   |
| 353 | 31 | 5941582 | 1483 |    |   | 1 | 1 |   | 5 | 2 | 2 | 5 | 2 |   | 1 | 5  | 4 | 1 | 1 | 1 | 1 | 1 | 1 |   |   |   | 1 | 1 | 1 | 1 | 1 | 1 | 1 | 1 | 7 | 1 | 1 | 1 | 1 | 7 | 7 | 7 | 7 | 1 | 1 | 7 | 7 | 1 | 1 | 1 | 1 | 1 | 2 | 4 | 6 | 3 | 3 |   |   |   |
| 354 | 31 | 5941582 | 1515 |    |   | 1 | 1 |   | 5 | 1 | 1 | 1 | 1 |   | 1 | 8  | 8 | 1 | 1 | 1 | 1 | 1 | 1 | 1 | 1 | 1 | 1 | 1 | 1 | 1 | 1 | 1 | 1 | 1 | 1 | 1 | 1 | 7 | 7 | 7 | 7 | 1 | 1 | 7 | 7 | 1 | 1 | 1 | 1 | 1 | 1 | 1 | 1 | 1 | 1 |   |   |   |   |   |
| 355 | 31 | 5941582 | 1458 |    |   | 3 | 1 |   | 1 | 6 | 1 | 6 | 4 |   | 1 | 16 | 5 | 4 | 4 | 4 | 4 | 4 | 4 | 4 | 4 | 4 | 4 | 4 | 4 | 4 | 4 | 4 | 4 | 4 | 4 | 4 | 4 | 4 | 4 | 4 | 4 | 4 | 4 | 4 | 4 | 4 | 4 | 4 | 4 | 4 | 4 | 4 | 4 | 4 | 4 | 4 |   |   |   |   |
| 356 | 31 | 5941582 | 54   |    |   | 1 | 1 |   | 1 | 6 | 1 | 6 | 1 |   | 1 | 3  | 6 | 4 | 4 | 4 | 4 | 4 | 4 | 4 | 4 | 4 | 4 | 4 | 4 | 4 | 4 | 4 | 4 | 4 | 4 | 4 | 4 | 4 | 4 | 4 | 4 | 4 | 4 | 4 | 4 | 4 | 4 | 4 | 4 | 4 | 4 | 4 | 4 | 4 | 4 | 4 |   |   |   |   |

|     |    |         |      |    |   |   |   |   |   |   |   |   |   |   |   |    |    |   |   |   |   |   |   |   |   |   |   |   |   |   |   |   |   |   |   |   |   |   |   |   |   |   |   |   |   |   |   |   |   |   |   |   |   |   |   |   |   |   |
|-----|----|---------|------|----|---|---|---|---|---|---|---|---|---|---|---|----|----|---|---|---|---|---|---|---|---|---|---|---|---|---|---|---|---|---|---|---|---|---|---|---|---|---|---|---|---|---|---|---|---|---|---|---|---|---|---|---|---|---|
| 357 | 31 | 5941582 | 214  |    |   | 1 | 1 |   | 5 | 3 | 2 | 4 | 1 |   | 1 | 78 | 12 | 6 | 5 | 3 | 5 | 4 | 4 | 4 | 4 | 4 | 6 | 4 | 5 | 5 | 5 | 5 | 5 | 5 | 5 | 5 | 5 | 5 | 3 | 3 | 3 | 3 | 5 | 5 | 2 | 2 | 4 | 4 | 4 | 4 | 4 | 4 | 5 | 5 | 5 | 5 |   |   |
| 358 | 31 | 5941582 | 47   | 12 | 1 | 1 | 1 | 4 | 5 | 4 | 1 | 6 | 1 | 1 | 3 | 26 | 7  | 7 | 7 | 7 | 7 | 7 | 7 | 6 | 6 | 6 | 7 | 7 | 6 | 7 | 7 | 7 | 7 | 3 | 7 | 1 | 1 | 1 | 1 | 1 | 1 | 1 | 1 | 1 | 1 | 1 | 1 | 1 | 3 | 2 | 2 | 4 |   |   |   |   |   |   |
| 359 | 31 | 5941582 | 48   | 12 | 1 | 1 | 1 | 4 | 5 | 4 | 1 | 6 | 1 | 1 | 1 | 2  | 3  | 6 | 4 | 5 | 7 | 7 | 4 | 2 | 2 | 2 | 4 | 5 | 4 | 6 | 5 | 7 | 7 | 7 | 7 | 5 | 5 | 5 | 2 | 7 | 6 | 3 | 6 | 6 | 3 | 3 | 5 | 6 | 4 | 5 | 6 | 5 | 5 | 5 | 3 | 3 |   |   |
| 36  | 31 | 5941582 | 5    | 12 | 1 | 1 | 1 | 6 | 5 | 7 | 1 | 3 | 3 | 1 | 4 | 4  | 8  | 7 | 7 | 7 | 7 | 7 | 7 | 7 | 7 | 7 | 7 | 7 | 7 | 7 | 7 | 7 | 7 | 1 | 1 | 1 | 1 | 1 | 1 | 1 | 7 | 1 | 1 | 3 | 3 | 1 | 1 | 1 | 1 | 1 | 1 | 7 | 7 | 1 | 4 |   |   |   |
| 361 | 31 | 5941582 | 88   | 12 | 1 | 1 | 1 | 5 | 5 | 4 | 1 | 6 | 3 | 2 | 1 | 29 |    | 4 | 3 | 3 | 6 | 6 | 6 | 5 | 4 | 5 | 7 | 6 | 7 | 7 | 7 | 7 | 7 | 7 | 2 | 2 | 1 | 1 | 2 | 1 | 7 | 2 | 2 | 6 | 5 | 3 | 3 | 2 | 2 | 3 | 3 | 5 | 3 | 3 | 3 |   |   |   |
| 362 | 31 | 5941582 | 618  | 12 | 1 | 1 | 1 | 5 | 5 | 4 | 3 | 6 | 3 | 1 | 1 | 33 |    | 4 | 3 | 3 | 6 | 5 | 5 | 6 | 6 | 5 | 3 | 4 | 5 | 4 | 4 | 4 | 5 | 7 | 7 | 3 | 2 | 1 | 5 | 4 | 4 | 5 | 4 | 4 | 1 | 2 | 3 | 4 | 1 | 2 | 1 | 3 | 4 | 3 | 4 | 5 |   |   |
| 363 | 31 | 5941582 | 475  | 12 | 1 | 2 | 1 | 7 | 1 | 7 | 1 | 2 | 1 | 2 | 4 | 35 | 8  | 7 | 6 | 7 | 7 | 7 | 7 | 6 | 5 | 5 | 4 | 4 | 4 | 7 | 7 | 7 | 7 | 2 | 7 | 1 | 1 | 1 | 1 | 2 | 1 | 7 | 2 | 2 | 2 | 2 | 1 | 1 | 1 | 2 | 2 | 2 | 7 | 6 | 2 | 7 |   |   |
| 364 | 31 | 5941582 | 776  | 12 | 1 | 1 | 1 | 3 | 5 | 6 | 1 | 6 | 3 | 1 | 1 | 4  |    | 3 | 3 | 3 | 7 | 7 | 5 | 7 | 7 | 7 | 7 | 7 | 4 | 7 | 7 | 7 | 7 | 6 | 6 | 2 | 1 | 1 | 1 | 1 | 1 | 7 | 1 | 5 | 1 | 1 | 1 | 1 | 1 | 1 | 1 | 6 | 5 | 2 | 6 |   |   |   |
| 365 | 31 | 5941582 | 59   | 12 | 1 | 1 | 1 | 6 | 1 | 6 | 1 | 6 | 3 | 1 | 3 | 15 | 9  | 6 | 6 | 7 | 7 | 7 | 6 | 6 | 6 | 6 | 7 | 7 | 7 | 7 | 6 | 6 | 5 | 6 | 1 | 1 | 1 | 2 | 2 | 7 | 7 | 2 | 2 | 3 | 3 | 1 | 1 | 1 | 1 | 1 | 1 | 4 | 3 | 1 | 6 |   |   |   |
| 366 | 31 | 5941582 | 392  | 12 | 1 | 1 | 1 | 6 | 5 | 4 | 2 | 6 | 1 | 1 | 1 | 18 | 18 | 6 | 6 | 6 | 6 | 6 | 7 | 2 | 1 | 2 | 3 | 3 | 3 | 5 | 5 | 6 | 6 | 7 | 4 | 1 | 5 | 1 | 2 | 2 | 5 | 5 | 3 | 2 | 3 | 4 | 2 | 2 | 4 | 6 | 4 | 4 | 4 | 4 | 2 | 4 |   |   |
| 367 | 31 | 5941582 | 654  | 12 | 1 | 1 | 1 | 5 | 5 | 4 | 2 | 6 | 3 | 1 | 1 | 6  | 17 | 7 | 7 | 7 | 7 | 7 | 7 | 5 | 5 | 4 | 7 | 6 | 7 | 7 | 7 | 7 | 7 | 5 | 7 | 2 | 1 | 1 | 1 | 2 | 2 | 7 | 1 | 1 | 1 | 1 | 1 | 1 | 1 | 1 | 1 | 4 | 2 | 1 | 7 |   |   |   |
| 368 | 31 | 5941582 | 358  | 12 | 1 | 1 | 1 | 6 | 1 | 4 | 1 | 3 | 3 | 2 | 3 | 45 |    | 7 | 6 | 5 | 6 | 6 | 6 | 7 | 6 | 6 | 6 | 6 | 6 | 6 | 6 | 5 | 6 | 6 | 6 | 1 | 1 | 1 | 1 | 1 | 1 | 7 | 2 | 2 | 2 | 2 | 1 | 1 | 1 | 1 | 2 | 2 | 4 | 3 | 3 | 2 |   |   |
| 369 | 31 | 5941582 | 8    | 12 | 1 | 1 | 1 | 5 | 5 | 6 | 1 | 6 | 1 | 1 | 3 | 36 |    | 7 | 7 | 7 | 6 | 7 | 6 | 6 | 6 | 6 |   |   |   | 7 | 7 | 6 | 4 | 5 | 6 | 1 | 1 | 1 | 1 | 1 | 2 | 7 | 3 | 4 | 3 | 3 | 1 | 1 | 1 | 1 | 2 | 1 | 4 | 4 | 2 |   |   |   |
| 37  | 31 | 5941582 | 1742 | 12 | 5 | 1 | 1 | 6 | 1 | 4 | 5 | 6 | 4 | 2 | 3 | 44 | 8  | 7 | 6 | 7 | 7 | 6 | 6 | 7 | 6 | 6 | 6 | 6 | 5 | 7 | 6 | 7 | 7 | 7 | 7 | 1 | 2 | 1 | 2 | 2 | 2 | 7 | 3 | 4 | 5 | 6 | 5 | 6 | 4 | 6 | 5 | 2 | 6 | 7 | 4 | 3 |   |   |
| 371 | 31 | 5941582 | 524  | 12 | 1 | 1 | 1 | 4 | 5 | 8 | 1 | 6 | 3 | 1 | 1 | 1  |    | 7 | 6 | 7 | 6 | 4 | 3 | 5 | 5 | 5 | 7 | 7 | 6 | 7 | 7 | 5 | 4 | 4 | 6 | 2 | 1 | 1 | 1 | 2 | 1 | 7 | 4 | 4 | 3 | 3 | 1 | 1 | 1 | 2 | 2 | 2 | 6 | 2 | 2 | 1 |   |   |
| 372 | 31 | 5941582 | 566  | 12 | 1 | 1 | 1 | 7 | 5 | 4 | 1 | 4 | 1 | 1 | 3 | 4  |    | 7 | 6 | 6 | 7 | 7 | 7 | 5 | 6 | 6 | 7 | 7 | 7 | 7 |   | 7 | 7 | 1 | 1 | 1 | 1 | 1 | 1 | 7 | 7 | 7 | 1 | 1 | 1 | 1 | 1 | 1 | 1 | 7 | 7 | 1 | 1 |   |   |   |   |   |
| 373 | 31 | 5941582 | 651  | 12 | 1 | 1 | 1 | 3 | 5 | 5 | 1 | 6 | 3 | 1 | 1 | 4  |    | 7 | 3 | 6 | 3 | 7 | 5 | 7 | 3 | 7 | 3 | 3 | 3 | 7 | 7 | 7 | 4 | 7 | 5 | 1 | 2 | 1 | 1 | 1 | 1 | 6 | 1 | 1 | 1 | 1 | 1 | 1 | 1 | 1 | 2 | 6 | 6 | 1 | 7 |   |   |   |
| 374 | 31 | 5941582 | 595  | 12 | 1 | 1 | 1 | 6 | 5 | 6 | 1 | 6 | 3 | 1 | 3 | 35 | 1  | 7 | 7 | 7 | 7 | 7 | 7 | 7 | 7 | 7 | 7 | 7 | 7 | 7 | 7 |   | 7 | 1 | 1 | 1 | 1 | 1 | 1 | 7 | 1 | 1 | 4 | 4 | 1 | 1 | 1 | 1 | 1 | 1 | 5 | 5 | 1 | 7 |   |   |   |   |
| 375 | 31 | 5941582 | 396  | 12 | 1 | 1 | 1 | 3 | 1 | 4 | 1 | 6 | 1 | 1 | 2 | 1  | 6  | 7 | 5 | 6 | 7 | 6 | 6 | 6 | 4 | 5 | 5 | 5 | 6 | 6 | 4 | 4 | 4 | 5 | 5 | 3 | 6 | 5 | 5 | 3 | 3 | 3 | 3 |   |   |   |   |   |   |   |   |   |   |   |   |   |   |   |
| 376 | 31 | 5941582 | 785  | 12 | 1 | 1 | 1 | 5 | 1 | 6 | 1 | 6 | 5 | 1 | 1 | 7  |    | 2 | 1 | 7 | 1 | 1 | 1 | 1 | 1 | 1 | 1 | 5 | 5 | 1 | 1 | 1 | 1 | 2 | 2 | 7 | 7 | 7 | 7 | 7 | 3 | 2 | 5 | 5 | 7 | 7 | 1 | 7 | 7 | 7 | 7 | 7 | 7 | 2 | 7 | 7 |   |   |
| 377 | 31 | 5941582 | 125  | 12 | 1 | 1 | 1 | 2 | 5 | 3 | 1 | 1 | 3 | 2 | 1 | 2  |    | 7 | 7 | 7 | 7 | 6 | 5 | 4 | 3 | 3 | 6 | 6 | 6 | 7 | 7 | 7 | 5 | 7 | 6 | 1 | 1 | 1 | 1 | 1 | 1 | 7 | 3 | 4 | 1 | 2 | 1 | 1 | 1 | 1 | 1 | 1 | 1 | 1 | 1 | 1 |   |   |
| 378 | 31 | 5941582 | 588  | 12 | 1 | 1 | 1 | 3 | 5 | 4 | 1 | 6 | 3 | 1 | 1 | 1  | 5  | 6 | 7 | 7 | 7 | 7 | 5 | 7 | 7 | 7 | 7 | 7 | 7 | 7 | 7 | 7 | 5 | 7 | 7 | 1 | 1 | 1 | 2 | 1 | 1 | 7 | 6 | 2 | 1 | 1 | 1 | 1 | 2 | 2 | 2 | 2 | 7 | 1 | 1 | 7 |   |   |
| 379 | 31 | 5941582 | 1483 |    |   | 1 | 1 |   | 5 | 2 | 2 | 5 | 2 |   | 1 | 5  | 4  | 1 | 1 | 1 | 1 | 1 | 1 |   |   |   | 1 | 1 | 1 | 1 | 1 | 1 | 1 | 7 | 1 | 1 | 1 | 1 | 1 | 7 | 7 | 7 | 7 | 1 | 1 | 7 | 7 | 1 | 1 | 1 | 1 | 1 | 2 | 4 | 6 | 3 | 3 |   |
| 38  | 31 | 5941582 | 1515 |    |   | 1 | 1 |   | 5 | 1 | 1 | 1 | 1 |   | 1 | 8  | 8  | 1 | 1 | 1 | 1 | 1 | 1 | 1 | 1 | 1 | 1 | 1 | 1 | 1 | 1 | 1 | 1 | 1 | 1 | 1 | 1 | 7 | 7 | 7 | 7 | 1 | 1 | 7 | 7 | 1 | 1 | 1 | 1 | 1 | 1 | 1 | 1 | 1 | 1 | 1 |   |   |
| 381 | 31 | 5941582 | 1458 |    |   | 3 | 1 |   | 1 | 6 | 1 | 6 | 4 |   | 1 | 16 | 5  | 4 | 4 | 4 | 4 | 4 | 4 | 4 | 4 | 4 | 4 | 4 | 4 | 4 | 4 | 4 | 4 | 4 | 4 | 4 | 4 | 4 | 4 | 4 | 4 | 4 | 4 | 4 | 4 | 4 | 4 | 4 | 4 | 4 | 4 | 4 | 4 | 4 | 4 | 4 |   |   |
| 382 | 31 | 5941582 | 54   |    |   | 1 | 1 |   | 1 | 6 | 1 | 6 | 1 |   | 1 | 3  | 6  | 4 | 4 | 4 | 4 | 4 | 4 | 4 | 4 | 4 | 4 | 4 | 4 | 4 | 4 | 4 | 4 | 4 | 4 | 4 | 4 | 4 | 4 | 4 | 4 | 4 | 4 | 4 | 4 | 4 | 4 | 4 | 4 | 4 | 4 | 4 | 4 | 4 | 4 |   |   |   |
| 383 | 31 | 5941582 | 214  |    |   | 1 | 1 |   | 5 | 3 | 2 | 4 | 1 |   | 1 | 78 | 12 | 6 | 5 | 3 | 5 | 4 | 4 | 4 | 4 | 4 | 6 | 4 | 5 | 5 | 5 | 5 | 5 | 5 | 5 | 5 | 5 | 5 | 5 | 3 | 3 | 3 | 3 | 5 | 5 | 2 | 2 | 4 | 4 | 4 | 4 | 4 | 4 | 4 | 5 | 5 | 5 | 5 |
| 384 | 31 | 5941582 | 47   | 12 | 1 | 1 | 1 | 4 | 5 | 4 | 1 | 6 | 1 | 1 | 3 | 26 | 7  | 7 | 7 | 7 | 7 | 7 | 7 | 6 | 6 | 6 | 7 | 7 | 6 | 7 | 7 | 7 | 7 | 3 | 7 | 1 | 1 | 1 | 1 | 1 | 1 | 7 | 1 | 1 | 1 | 3 | 1 | 1 | 1 | 1 | 1 | 3 | 2 | 2 | 4 |   |   |   |
| 385 | 31 | 5941582 | 48   | 12 | 1 | 1 | 1 | 4 | 5 | 4 | 1 | 6 | 1 | 1 |   |    |    |   |   |   |   |   |   |   |   |   |   |   |   |   |   |   |   |   |   |   |   |   |   |   |   |   |   |   |   |   |   |   |   |   |   |   |   |   |   |   |   |   |

|     |    |         |      |    |   |   |   |   |   |   |   |   |   |   |   |    |    |   |   |   |   |   |   |   |   |   |   |   |   |   |   |   |   |   |   |   |   |   |   |   |   |   |   |   |   |   |   |   |   |   |   |   |   |   |   |   |   |
|-----|----|---------|------|----|---|---|---|---|---|---|---|---|---|---|---|----|----|---|---|---|---|---|---|---|---|---|---|---|---|---|---|---|---|---|---|---|---|---|---|---|---|---|---|---|---|---|---|---|---|---|---|---|---|---|---|---|---|
| 387 | 31 | 5941582 | 88   | 12 | 1 | 1 | 1 | 5 | 5 | 4 | 1 | 6 | 3 | 2 | 1 | 29 |    | 4 | 3 | 3 | 6 | 6 | 6 | 5 | 4 | 5 | 7 | 6 | 7 | 7 | 7 | 7 | 7 | 7 | 7 | 2 | 2 | 1 | 1 | 2 | 1 | 7 | 2 | 2 | 6 | 5 | 3 | 3 | 2 | 2 | 3 | 3 | 5 | 3 | 3 | 3 |   |
| 388 | 31 | 5941582 | 618  | 12 | 1 | 1 | 1 | 5 | 5 | 4 | 3 | 6 | 3 | 1 | 1 | 33 |    | 4 | 3 | 3 | 6 | 5 | 5 | 6 | 6 | 5 | 3 | 4 | 5 | 4 | 4 | 4 | 5 | 7 | 7 | 3 | 2 | 1 | 5 | 4 | 4 | 5 | 4 | 4 | 1 | 2 | 3 | 4 | 1 | 2 | 1 | 3 | 4 | 3 | 4 | 5 |   |
| 389 | 31 | 5941582 | 475  | 12 | 1 | 2 | 1 | 7 | 1 | 7 | 1 | 2 | 1 | 2 | 4 | 35 | 8  | 7 | 6 | 7 | 7 | 7 | 7 | 6 | 5 | 5 | 4 | 4 | 4 | 7 | 7 | 7 | 7 | 7 | 2 | 7 | 1 | 1 | 1 | 1 | 2 | 1 | 7 | 2 | 2 | 2 | 2 | 1 | 1 | 1 | 2 | 2 | 2 | 7 | 6 | 2 | 7 |
| 39  | 31 | 5941582 | 776  | 12 | 1 | 1 | 1 | 3 | 5 | 6 | 1 | 6 | 3 | 1 | 1 | 4  |    | 3 | 3 | 3 | 7 | 7 | 5 | 7 | 7 | 7 | 7 | 7 | 4 | 7 | 7 | 7 | 7 | 7 | 6 | 6 | 2 | 1 | 1 | 1 | 1 | 1 | 7 | 1 | 5 | 1 | 1 | 1 | 1 | 1 | 1 | 1 | 6 | 5 | 2 | 6 |   |
| 391 | 31 | 5941582 | 59   | 12 | 1 | 1 | 1 | 6 | 1 | 6 | 1 | 6 | 3 | 1 | 3 | 15 | 9  | 6 | 6 | 7 | 7 | 7 | 6 | 6 | 6 | 6 | 7 | 7 | 7 | 7 | 7 | 6 | 6 | 5 | 6 | 1 | 1 | 1 | 2 | 2 | 7 | 7 | 2 | 2 | 3 | 3 | 1 | 1 | 1 | 1 | 1 | 1 | 4 | 3 | 1 | 6 |   |
| 392 | 31 | 5941582 | 392  | 12 | 1 | 1 | 1 | 6 | 5 | 4 | 2 | 6 | 1 | 1 | 1 | 18 | 18 | 6 | 6 | 6 | 6 | 6 | 7 | 2 | 1 | 2 | 3 | 3 | 3 | 5 | 5 | 6 | 6 | 7 | 4 | 1 | 5 | 1 | 2 | 2 | 5 | 5 | 3 | 2 | 3 | 4 | 2 | 2 | 4 | 6 | 4 | 4 | 4 | 4 | 2 | 4 |   |
| 393 | 31 | 5941582 | 654  | 12 | 1 | 1 | 1 | 5 | 5 | 4 | 2 | 6 | 3 | 1 | 1 | 6  | 17 | 7 | 7 | 7 | 7 | 7 | 7 | 5 | 5 | 4 | 7 | 6 | 7 | 7 | 7 | 7 | 7 | 5 | 7 | 2 | 1 | 1 | 1 | 2 | 2 | 7 | 1 | 1 | 1 | 1 | 1 | 1 | 1 | 1 | 1 | 4 | 2 | 1 | 7 |   |   |
| 394 | 31 | 5941582 | 358  | 12 | 1 | 1 | 1 | 6 | 1 | 4 | 1 | 3 | 3 | 2 | 3 | 45 |    | 7 | 6 | 5 | 6 | 6 | 6 | 7 | 6 | 6 | 6 | 6 | 6 | 6 | 5 | 6 | 6 | 6 | 1 | 1 | 1 | 1 | 1 | 1 | 7 | 2 | 2 | 2 | 2 | 1 | 1 | 1 | 1 | 2 | 2 | 4 | 3 | 3 | 2 |   |   |
| 395 | 31 | 5941582 | 8    | 12 | 1 | 1 | 1 | 5 | 5 | 6 | 1 | 6 | 1 | 1 | 3 | 36 |    | 7 | 7 | 7 | 6 | 7 | 6 | 6 | 6 | 6 |   |   |   | 7 | 7 | 6 | 4 | 5 | 6 | 1 | 1 | 1 | 1 | 1 | 2 | 7 | 3 | 4 | 3 | 3 | 1 | 1 | 1 | 1 | 2 | 1 | 4 | 4 | 2 |   |   |
| 396 | 31 | 5941582 | 1742 | 12 | 5 | 1 | 1 | 6 | 1 | 4 | 5 | 6 | 4 | 2 | 3 | 44 | 8  | 7 | 6 | 7 | 7 | 6 | 6 | 7 | 6 | 6 | 6 | 6 | 5 | 7 | 6 | 7 | 7 | 7 | 7 | 1 | 2 | 1 | 2 | 2 | 2 | 7 | 3 | 4 | 5 | 6 | 5 | 6 | 4 | 6 | 5 | 2 | 6 | 7 | 4 | 3 |   |
| 397 | 31 | 5941582 | 524  | 12 | 1 | 1 | 1 | 4 | 5 | 8 | 1 | 6 | 3 | 1 | 1 | 1  |    | 7 | 6 | 7 | 6 | 4 | 3 | 5 | 5 | 5 | 7 | 7 | 6 | 7 | 7 | 5 | 4 | 4 | 6 | 2 | 1 | 1 | 1 | 2 | 1 | 7 | 4 | 4 | 3 | 3 | 1 | 1 | 1 | 2 | 2 | 2 | 6 | 2 | 2 | 1 |   |
| 398 | 31 | 5941582 | 566  | 12 | 1 | 1 | 1 | 7 | 5 | 4 | 1 | 4 | 1 | 1 | 3 | 4  |    | 7 | 6 | 6 | 7 | 7 | 7 | 5 | 6 | 6 | 7 | 7 | 7 | 7 | 7 |   | 7 | 7 | 1 | 1 | 1 | 1 | 1 | 1 | 7 | 7 | 7 | 1 | 1 | 1 | 1 | 1 | 1 | 1 | 1 | 7 | 7 | 1 | 1 |   |   |
| 399 | 31 | 5941582 | 651  | 12 | 1 | 1 | 1 | 3 | 5 | 5 | 1 | 6 | 3 | 1 | 1 | 4  |    | 7 | 3 | 6 | 3 | 7 | 5 | 7 | 3 | 7 | 3 | 3 | 3 | 7 | 7 | 7 | 4 | 7 | 5 | 1 | 2 | 1 | 1 | 1 | 1 | 6 | 1 | 1 | 1 | 1 | 1 | 1 | 1 | 1 | 1 | 2 | 6 | 6 | 1 | 7 |   |
| 4   | 31 | 5941582 | 595  | 12 | 1 | 1 | 1 | 6 | 5 | 6 | 1 | 6 | 3 | 1 | 3 | 35 | 1  | 7 | 7 | 7 | 7 | 7 | 7 | 7 | 7 | 7 | 7 | 7 | 7 | 7 | 7 | 7 |   | 7 | 1 | 1 | 1 | 1 | 1 | 1 | 7 | 1 | 1 | 4 | 4 | 1 | 1 | 1 | 1 | 1 | 1 | 5 | 5 | 1 | 7 |   |   |
| 41  | 31 | 5941582 | 396  | 12 | 1 | 1 | 1 | 3 | 1 | 4 | 1 | 6 | 1 | 1 | 2 | 1  | 6  | 7 | 5 | 6 | 7 | 6 | 6 | 6 | 4 | 5 | 5 | 5 | 6 | 6 | 4 | 4 | 4 | 5 | 5 | 3 | 6 | 5 | 5 | 3 | 3 | 3 | 3 |   |   |   |   |   |   |   |   |   |   |   |   |   |   |
| 42  | 31 | 5941582 | 785  | 12 | 1 | 1 | 1 | 5 | 1 | 6 | 1 | 6 | 5 | 1 | 1 | 7  |    | 2 | 1 | 7 | 1 | 1 | 1 | 1 | 1 | 1 | 1 | 5 | 5 | 1 | 1 | 1 | 1 | 2 | 2 | 7 | 7 | 7 | 7 | 7 | 3 | 2 | 5 | 5 | 7 | 7 | 1 | 7 | 7 | 7 | 7 | 7 | 7 | 2 | 7 | 7 |   |
| 43  | 31 | 5941582 | 125  | 12 | 1 | 1 | 1 | 2 | 5 | 3 | 1 | 1 | 3 | 2 | 1 | 2  |    | 7 | 7 | 7 | 7 | 6 | 5 | 4 | 3 | 3 | 6 | 6 | 6 | 7 | 7 | 7 | 5 | 7 | 6 | 1 | 1 | 1 | 1 | 1 | 1 | 7 | 3 | 4 | 1 | 2 | 1 | 1 | 1 | 1 | 1 | 1 | 1 | 1 | 1 |   |   |
| 44  | 31 | 5941582 | 588  | 12 | 1 | 1 | 1 | 3 | 5 | 4 | 1 | 6 | 3 | 1 | 1 | 1  | 5  | 6 | 7 | 7 | 7 | 7 | 5 | 7 | 7 | 7 | 7 | 7 | 7 | 7 | 7 | 5 | 7 | 7 | 1 | 1 | 1 | 2 | 1 | 1 | 7 | 6 | 2 | 1 | 1 | 1 | 1 | 2 | 2 | 2 | 2 | 7 | 1 | 1 | 7 |   |   |
| 45  | 31 | 5941582 | 651  | 12 | 1 | 1 | 1 | 3 | 5 | 5 | 1 | 6 | 3 | 1 | 1 | 4  |    | 7 | 3 | 6 | 3 | 7 | 5 | 7 | 3 | 7 | 3 | 3 | 3 | 7 | 7 | 7 | 4 | 7 | 5 | 1 | 2 | 1 | 1 | 1 | 1 | 6 | 1 | 1 | 1 | 1 | 1 | 1 | 1 | 1 | 2 | 6 | 6 | 1 | 7 |   |   |
| 46  | 31 | 5941582 | 595  | 12 | 1 | 1 | 1 | 6 | 5 | 6 | 1 | 6 | 3 | 1 | 3 | 35 | 1  | 7 | 7 | 7 | 7 | 7 | 7 | 7 | 7 | 7 | 7 | 7 | 7 | 7 | 7 |   | 7 | 1 | 1 | 1 | 1 | 1 | 1 | 7 | 1 | 1 | 4 | 4 | 1 | 1 | 1 | 1 | 1 | 1 | 5 | 5 | 1 | 7 |   |   |   |
| 47  | 31 | 5941582 | 392  | 12 | 1 | 1 | 1 | 6 | 5 | 4 | 2 | 6 | 1 | 1 | 1 | 18 | 18 | 6 | 6 | 6 | 6 | 6 | 7 | 2 | 1 | 2 | 3 | 3 | 3 | 5 | 5 | 6 | 6 | 7 | 4 | 1 | 5 | 1 | 2 | 2 | 5 | 5 | 3 | 2 | 3 | 4 | 2 | 2 | 4 | 6 | 4 | 4 | 4 | 4 | 2 | 4 |   |
| 48  | 31 | 5941582 | 654  | 12 | 1 | 1 | 1 | 5 | 5 | 4 | 2 | 6 | 3 | 1 | 1 | 6  | 17 | 7 | 7 | 7 | 7 | 7 | 7 | 5 | 5 | 4 | 7 | 6 | 7 | 7 | 7 | 7 | 7 | 5 | 7 | 2 | 1 | 1 | 1 | 2 | 2 | 7 | 1 | 1 | 1 | 1 | 1 | 1 | 1 | 1 | 1 | 4 | 2 | 1 | 7 |   |   |
| 49  | 31 | 5941582 | 358  | 12 | 1 | 1 | 1 | 6 | 1 | 4 | 1 | 3 | 3 | 2 | 3 | 45 |    | 7 | 6 | 5 | 6 | 6 | 6 | 7 | 6 | 6 | 6 | 6 | 6 | 6 | 5 | 6 | 6 | 6 | 1 | 1 | 1 | 1 | 1 | 1 | 7 | 2 | 2 | 2 | 2 | 1 | 1 | 1 | 1 | 2 | 2 | 4 | 3 | 3 | 2 |   |   |
| 41  | 31 | 5941582 | 8    | 12 | 1 | 1 | 1 | 5 | 5 | 6 | 1 | 6 | 1 | 1 | 3 | 36 |    | 7 | 7 | 7 | 6 | 7 | 6 | 6 | 6 | 6 |   |   |   | 7 | 7 | 6 | 4 | 5 | 6 | 1 | 1 | 1 | 1 | 1 | 2 | 7 | 3 | 4 | 3 | 3 | 1 | 1 | 1 | 1 | 2 | 1 | 4 | 4 | 2 |   |   |
| 411 | 31 | 5941582 | 1742 | 12 | 5 | 1 | 1 | 6 | 1 | 4 | 5 | 6 | 4 | 2 | 3 | 44 | 8  | 7 | 6 | 7 | 7 | 6 | 6 | 7 | 6 | 6 | 6 | 6 | 5 | 7 | 6 | 7 | 7 | 7 | 7 | 1 | 2 | 1 | 2 | 2 | 2 | 7 | 3 | 4 | 5 | 6 | 5 | 6 | 4 | 6 | 5 | 2 | 6 | 7 | 4 | 3 |   |
